# Supplementary material for: Fused ring aziridines as a facile entry into triazole fused tricyclic and bicyclic heterocycles
Source: Royal Society of Chemistry journal article supplement (doi:10.1039/c2ob07042a), 2012-01-01

## Supporting Information

# Fused Ring Aziridines as a Facile Entry into Triazole Fused Tricyclic and Bicyclic Heterocycles

Fang Fang, Megan Vogel, Jennifer V. Hines and Stephen C. Bergmeier\*

Clippinger Laboratory, Department of Chemistry and Biochemistry, Ohio University, Athens, OH, 45701, USA.

Fax: +17405930148; Tel: +17405979649;

Email: bergmeis@ohio.edu

### Table of Contents

|                                                                                                             |    |
|-------------------------------------------------------------------------------------------------------------|----|
| Figure 1. <sup>1</sup> H and <sup>13</sup> C NMR spectra for compound <b>2</b> (CDCl <sub>3</sub> ) .....   | 3  |
| Figure 2. <sup>1</sup> H and <sup>13</sup> C NMR spectra for compound <b>5b</b> (CDCl <sub>3</sub> ) .....  | 4  |
| Figure 3. <sup>1</sup> H and <sup>13</sup> C NMR spectra for compound <b>5h</b> (CDCl <sub>3</sub> ) .....  | 5  |
| Figure 4. <sup>1</sup> H and <sup>13</sup> C NMR spectra for compound <b>6a</b> (CDCl <sub>3</sub> ) .....  | 6  |
| Figure 5. <sup>1</sup> H and <sup>13</sup> C NMR spectra for compound <b>6b</b> (CDCl <sub>3</sub> ) .....  | 7  |
| Figure 6. <sup>1</sup> H and <sup>13</sup> C NMR spectra for compound <b>6c</b> (CDCl <sub>3</sub> ) .....  | 8  |
| Figure 7. <sup>1</sup> H and <sup>13</sup> C NMR spectra for compound <b>6d</b> (CDCl <sub>3</sub> ) .....  | 9  |
| Figure 8. <sup>1</sup> H and <sup>13</sup> C NMR spectra for compound <b>6e</b> (CDCl <sub>3</sub> ) .....  | 10 |
| Figure 9. <sup>1</sup> H and <sup>13</sup> C NMR spectra for compound <b>6f</b> (CDCl <sub>3</sub> ) .....  | 11 |
| Figure 10. <sup>1</sup> H and <sup>13</sup> C NMR spectra for compound <b>6g</b> (CDCl <sub>3</sub> ) ..... | 12 |
| Figure 11. <sup>1</sup> H and <sup>13</sup> C NMR spectra for compound <b>6i</b> (CDCl <sub>3</sub> ) ..... | 13 |
| Figure 12. <sup>1</sup> H and <sup>13</sup> C NMR spectra for compound <b>6j</b> (CDCl <sub>3</sub> ) ..... | 14 |
| Figure 13. <sup>1</sup> H and <sup>13</sup> C NMR spectra for compound <b>6k</b> (CDCl <sub>3</sub> ) ..... | 15 |
| Figure 14. <sup>1</sup> H and <sup>13</sup> C NMR spectra for compound <b>6l</b> (CDCl <sub>3</sub> ) ..... | 16 |
| Figure 15. <sup>1</sup> H and <sup>13</sup> C NMR spectra for compound <b>6m</b> (CDCl <sub>3</sub> ) ..... | 17 |
| Figure 16. <sup>1</sup> H and <sup>13</sup> C NMR spectra for compound <b>6n</b> (CDCl <sub>3</sub> ) ..... | 18 |
| Figure 17. <sup>1</sup> H and <sup>13</sup> C NMR spectra for compound <b>6o</b> (CDCl <sub>3</sub> ) ..... | 19 |
| Figure 18. <sup>1</sup> H and <sup>13</sup> C NMR spectra for compound <b>6p</b> (CDCl <sub>3</sub> ) ..... | 20 |
| Figure 19. <sup>1</sup> H and <sup>13</sup> C NMR spectra for compound <b>6q</b> (CDCl <sub>3</sub> ) ..... | 21 |
| Figure 20. <sup>1</sup> H and <sup>13</sup> C NMR spectra for compound <b>6r</b> (CDCl <sub>3</sub> ) ..... | 22 |
| Figure 21. <sup>1</sup> H and <sup>13</sup> C NMR spectra for compound <b>7a</b> (CDCl <sub>3</sub> ) ..... | 23 |
| Figure 22. <sup>1</sup> H and <sup>13</sup> C NMR spectra for compound <b>7b</b> (CDCl <sub>3</sub> ) ..... | 24 |
| Figure 23. <sup>1</sup> H and <sup>13</sup> C NMR spectra for compound <b>7c</b> (CDCl <sub>3</sub> ) ..... | 25 |
| Figure 24. <sup>1</sup> H and <sup>13</sup> C NMR spectra for compound <b>7d</b> (CDCl <sub>3</sub> ) ..... | 26 |
| Figure 25. <sup>1</sup> H and <sup>13</sup> C NMR spectra for compound <b>7e</b> (CDCl <sub>3</sub> ) ..... | 27 |
| Figure 26. <sup>1</sup> H and <sup>13</sup> C NMR spectra for compound <b>7f</b> (CDCl <sub>3</sub> ) ..... | 28 |
| Figure 27. <sup>1</sup> H and <sup>13</sup> C NMR spectra for compound <b>7g</b> (CDCl <sub>3</sub> ) ..... | 29 |
| Figure 28. <sup>1</sup> H and <sup>13</sup> C NMR spectra for compound <b>7i</b> (CDCl <sub>3</sub> ) ..... | 30 |
| Figure 29. <sup>1</sup> H and <sup>13</sup> C NMR spectra for compound <b>7j</b> (CDCl <sub>3</sub> ) ..... | 31 |
| Figure 30. <sup>1</sup> H and <sup>13</sup> C NMR spectra for compound <b>7k</b> (CDCl <sub>3</sub> ) ..... | 32 |

|                                                                                                           |    |
|-----------------------------------------------------------------------------------------------------------|----|
| Figure 31. $^1\text{H}$ and $^{13}\text{C}$ NMR spectra for compound <b>7l</b> ( $\text{CDCl}_3$ ) .....  | 33 |
| Figure 32. $^1\text{H}$ and $^{13}\text{C}$ NMR spectra for compound <b>7m</b> ( $\text{CDCl}_3$ ) .....  | 34 |
| Figure 33. $^1\text{H}$ and $^{13}\text{C}$ NMR spectra for compound <b>7n</b> ( $\text{CDCl}_3$ ) .....  | 35 |
| Figure 34. $^1\text{H}$ and $^{13}\text{C}$ NMR spectra for compound <b>7o</b> ( $\text{CDCl}_3$ ) .....  | 36 |
| Figure 35. $^1\text{H}$ and $^{13}\text{C}$ NMR spectra for compound <b>7p</b> ( $\text{CDCl}_3$ ) .....  | 37 |
| Figure 36. $^1\text{H}$ and $^{13}\text{C}$ NMR spectra for compound <b>7q</b> ( $\text{CDCl}_3$ ) .....  | 38 |
| Figure 37. $^1\text{H}$ and $^{13}\text{C}$ NMR spectra for compound <b>14q</b> ( $\text{CDCl}_3$ ) ..... | 39 |
| Figure 38. $^1\text{H}$ and $^{13}\text{C}$ NMR spectra for compound <b>15a</b> ( $\text{CDCl}_3$ ) ..... | 40 |
| Figure 39. $^1\text{H}$ and $^{13}\text{C}$ NMR spectra for compound <b>15b</b> ( $\text{CDCl}_3$ ) ..... | 41 |
| Figure 40. $^1\text{H}$ and $^{13}\text{C}$ NMR spectra for compound <b>15c</b> ( $\text{CDCl}_3$ ) ..... | 42 |
| Figure 41. $^1\text{H}$ and $^{13}\text{C}$ NMR spectra for compound <b>15d</b> ( $\text{CDCl}_3$ ) ..... | 43 |
| Figure 42. $^1\text{H}$ and $^{13}\text{C}$ NMR spectra for compound <b>8a</b> ( $\text{CDCl}_3$ ) .....  | 44 |
| Figure 43. $^1\text{H}$ and $^{13}\text{C}$ NMR spectra for compound <b>8c</b> ( $\text{CDCl}_3$ ) .....  | 45 |
| Figure 44. $^1\text{H}$ and $^{13}\text{C}$ NMR spectra for compound <b>8i</b> ( $\text{CDCl}_3$ ) .....  | 46 |
| Figure 45. $^1\text{H}$ and $^{13}\text{C}$ NMR spectra for compound <b>8k</b> ( $\text{CDCl}_3$ ) .....  | 47 |
| Figure 46. $^1\text{H}$ and $^{13}\text{C}$ NMR spectra for compound <b>8l</b> ( $\text{CDCl}_3$ ) .....  | 48 |
| Figure 47. $^1\text{H}$ and $^{13}\text{C}$ NMR spectra for compound <b>8m</b> ( $\text{CDCl}_3$ ) .....  | 49 |
| Figure 48. $^1\text{H}$ and $^{13}\text{C}$ NMR spectra for compound <b>8n</b> ( $\text{CDCl}_3$ ) .....  | 50 |
| Figure 49. $^1\text{H}$ and $^{13}\text{C}$ NMR spectra for compound <b>8o</b> ( $\text{CDCl}_3$ ) .....  | 51 |
| Figure 50. $^1\text{H}$ and $^{13}\text{C}$ NMR spectra for compound <b>8p</b> ( $\text{CDCl}_3$ ) .....  | 52 |
| Figure 51. $^1\text{H}$ and $^{13}\text{C}$ NMR spectra for compound <b>8q</b> ( $\text{CDCl}_3$ ) .....  | 53 |

Figure 1.  $^1\text{H}$  and  $^{13}\text{C}$  NMR spectra for compound **2** ( $\text{CDCl}_3$ )

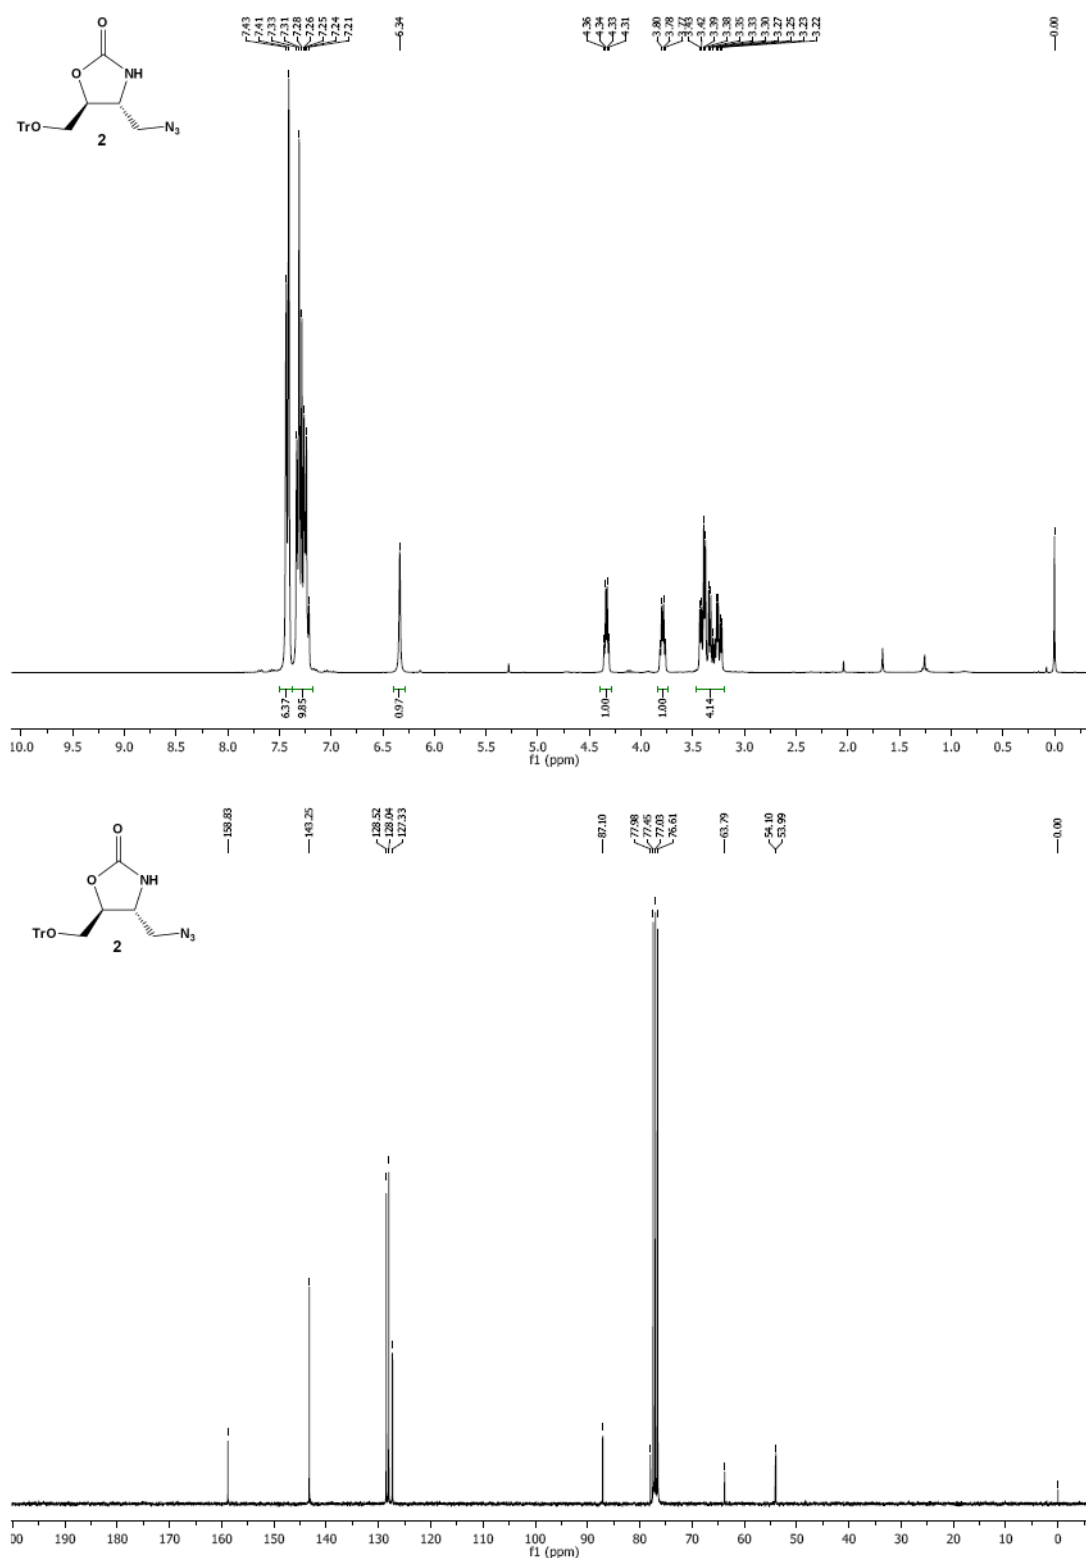

Figure 2.  $^1\text{H}$  and  $^{13}\text{C}$  NMR spectra for compound **5b** ( $\text{CDCl}_3$ )

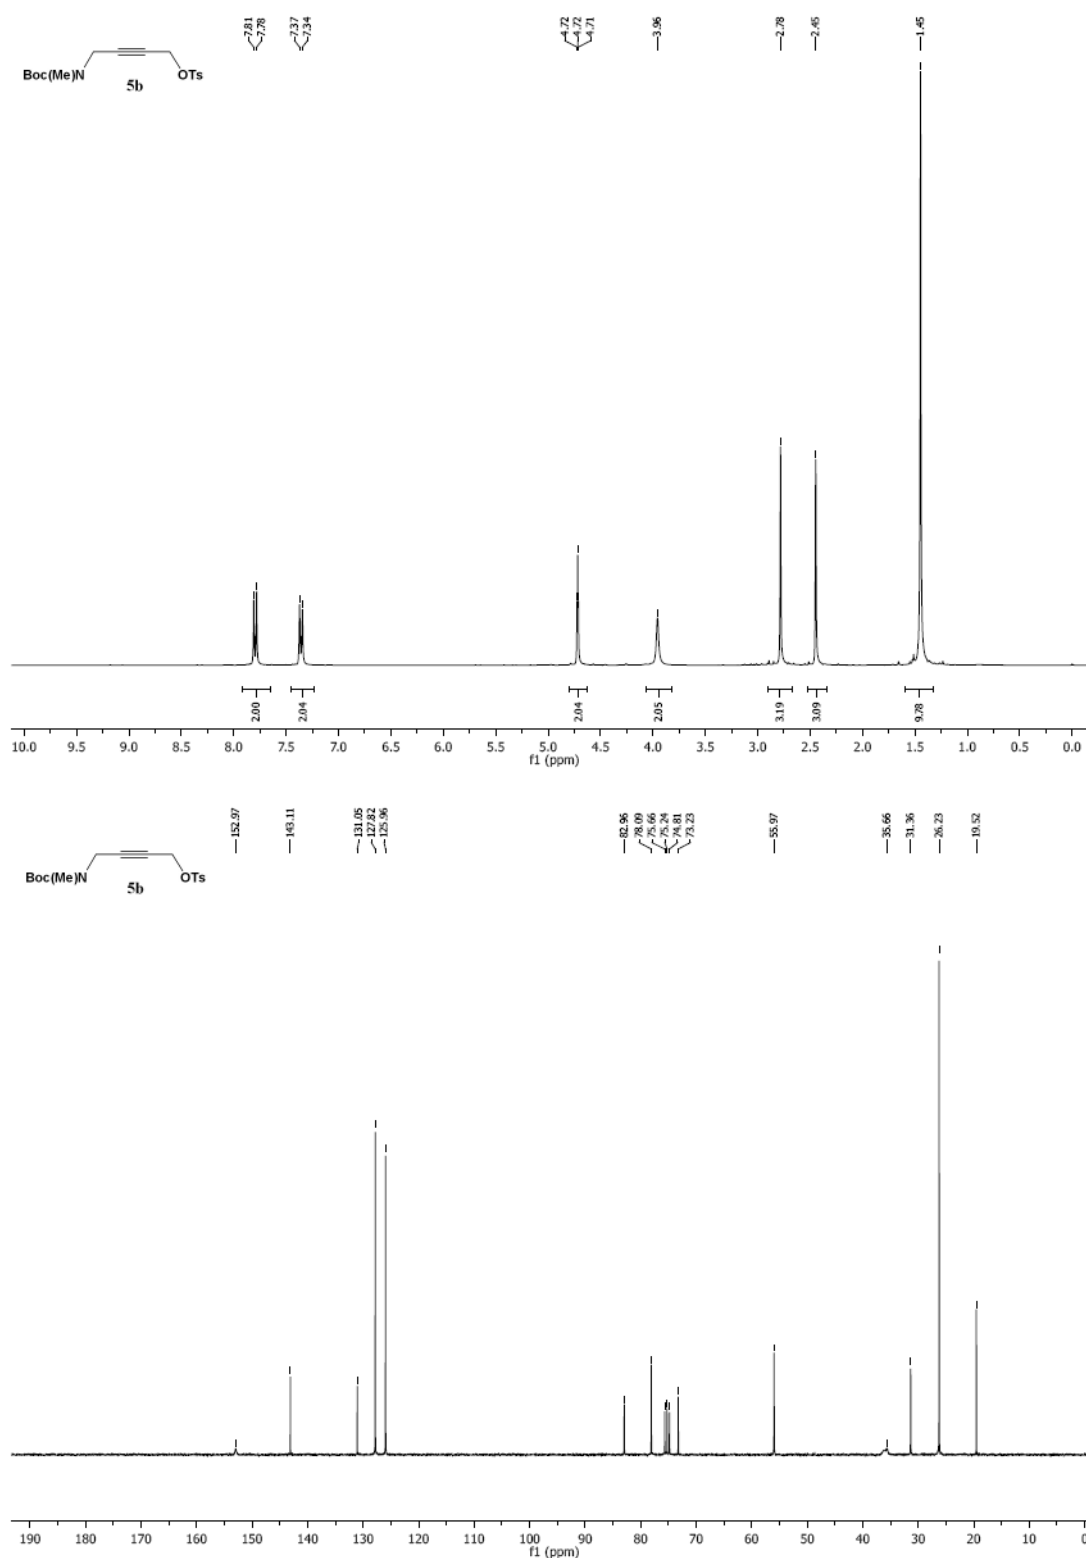

Figure 3.  $^1\text{H}$  and  $^{13}\text{C}$  NMR spectra for compound **5h** ( $\text{CDCl}_3$ )

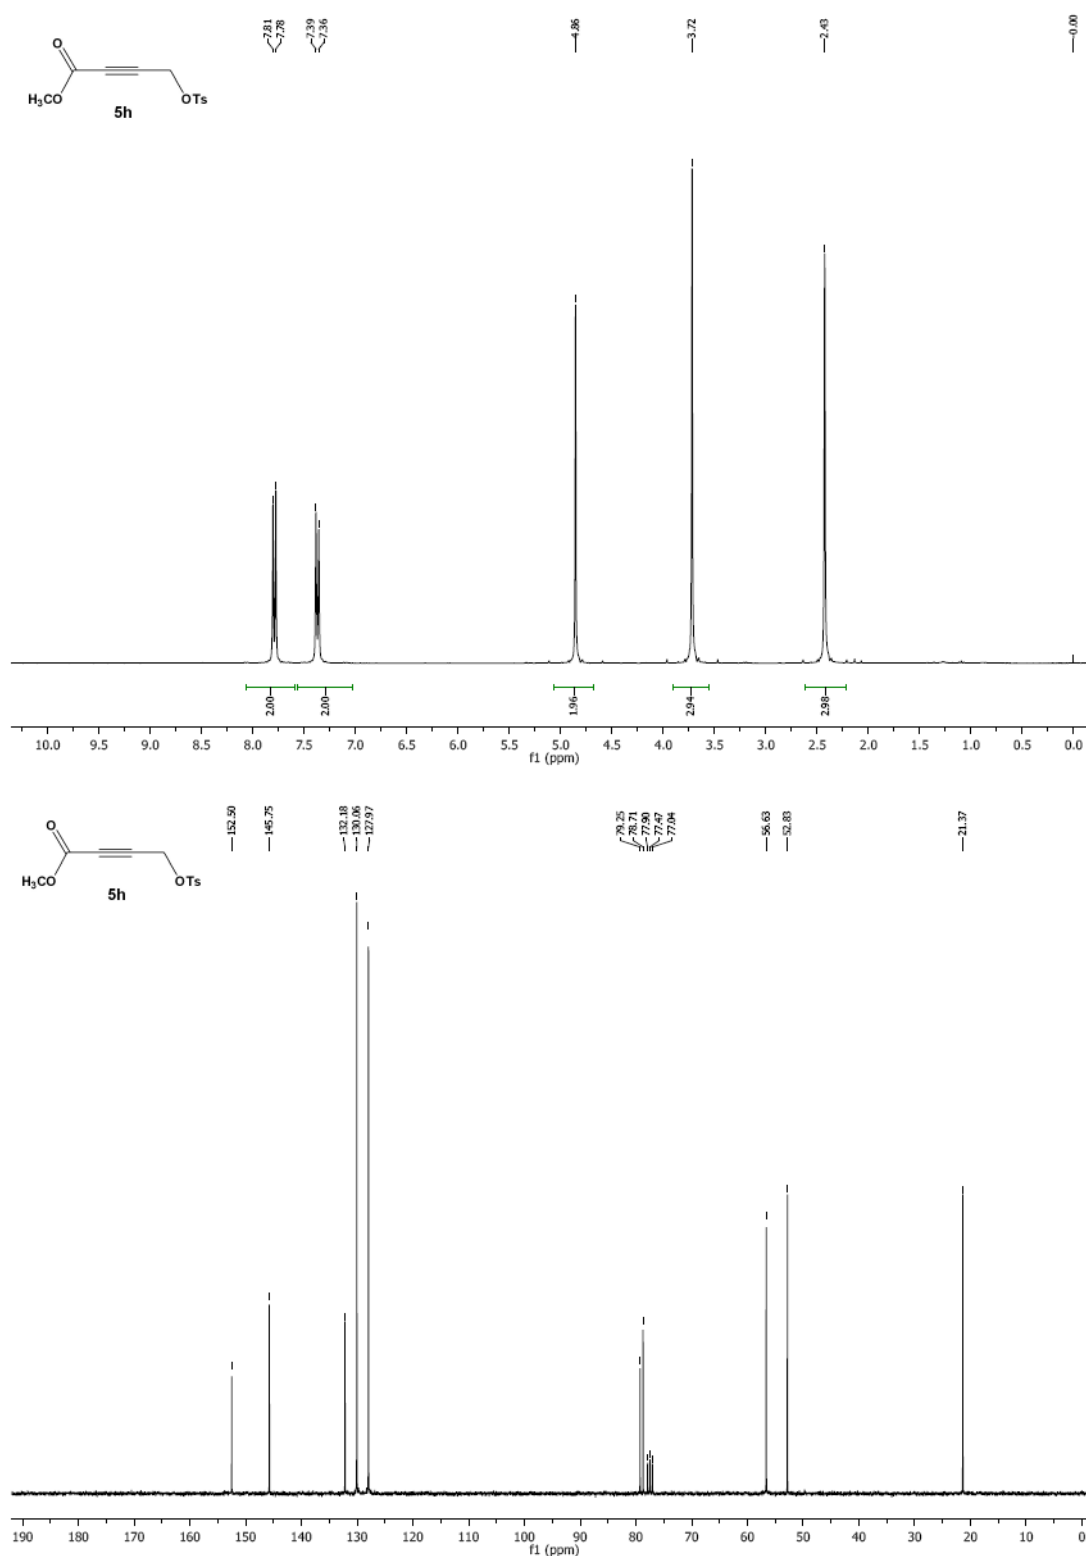

Figure 4.  $^1\text{H}$  and  $^{13}\text{C}$  NMR spectra for compound **6a** ( $\text{CDCl}_3$ )

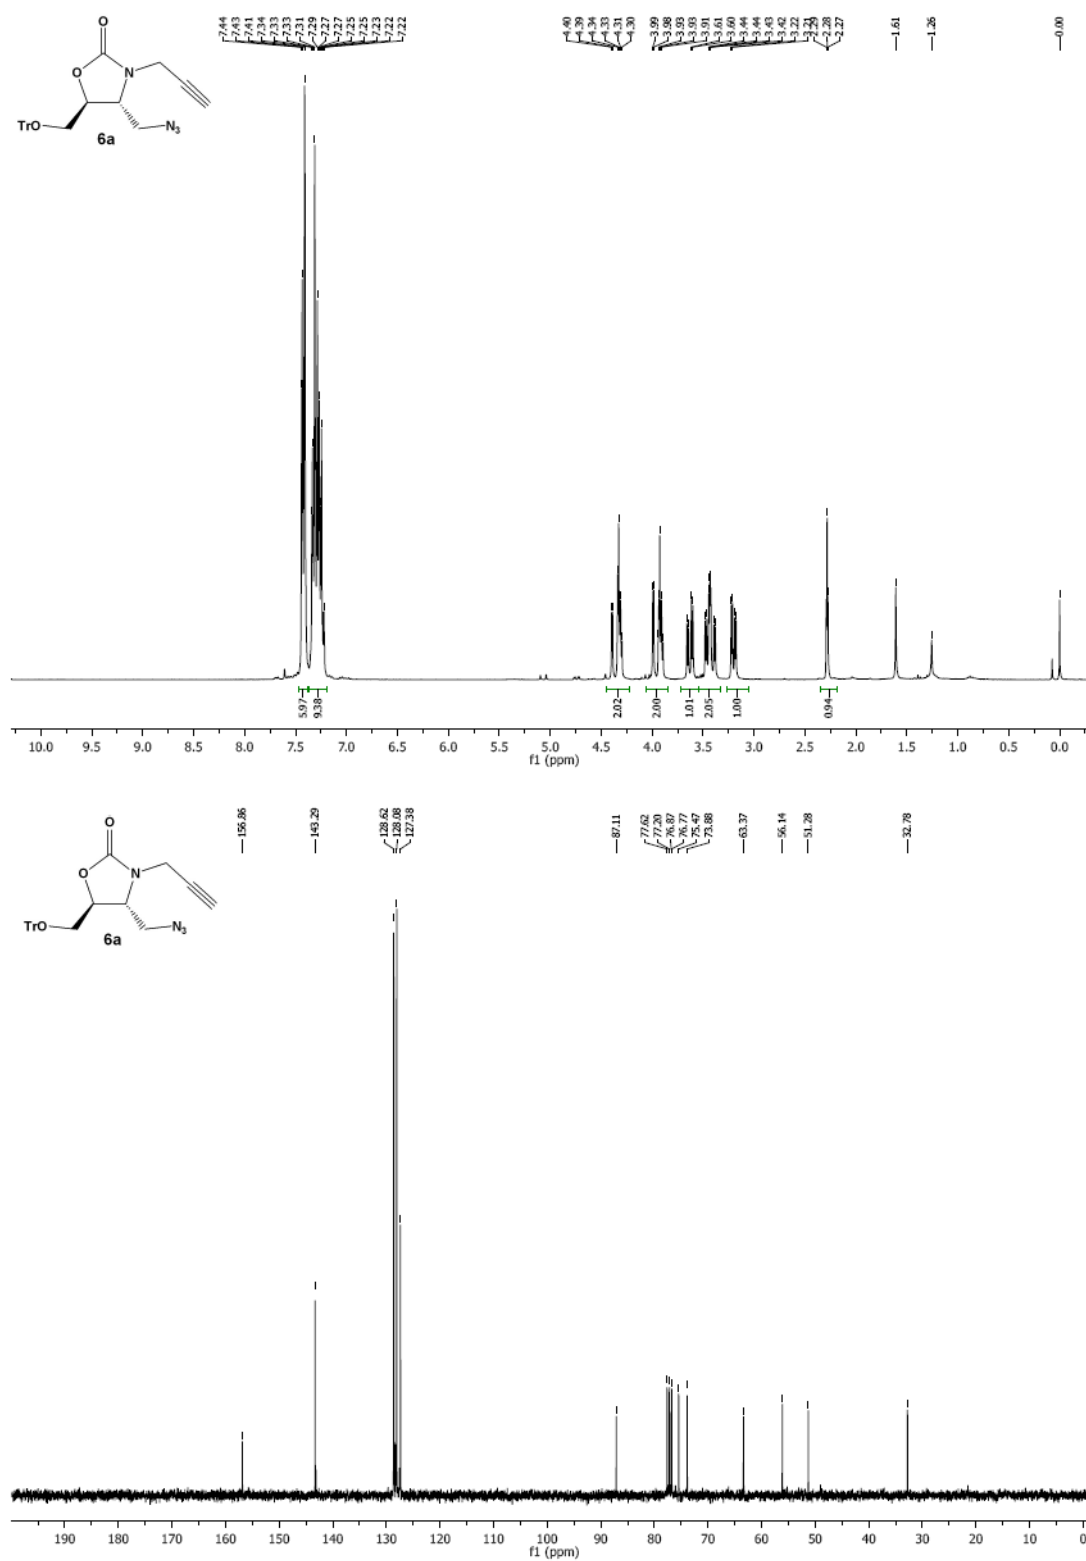

Figure 5.  $^1\text{H}$  and  $^{13}\text{C}$  NMR spectra for compound **6b** ( $\text{CDCl}_3$ )

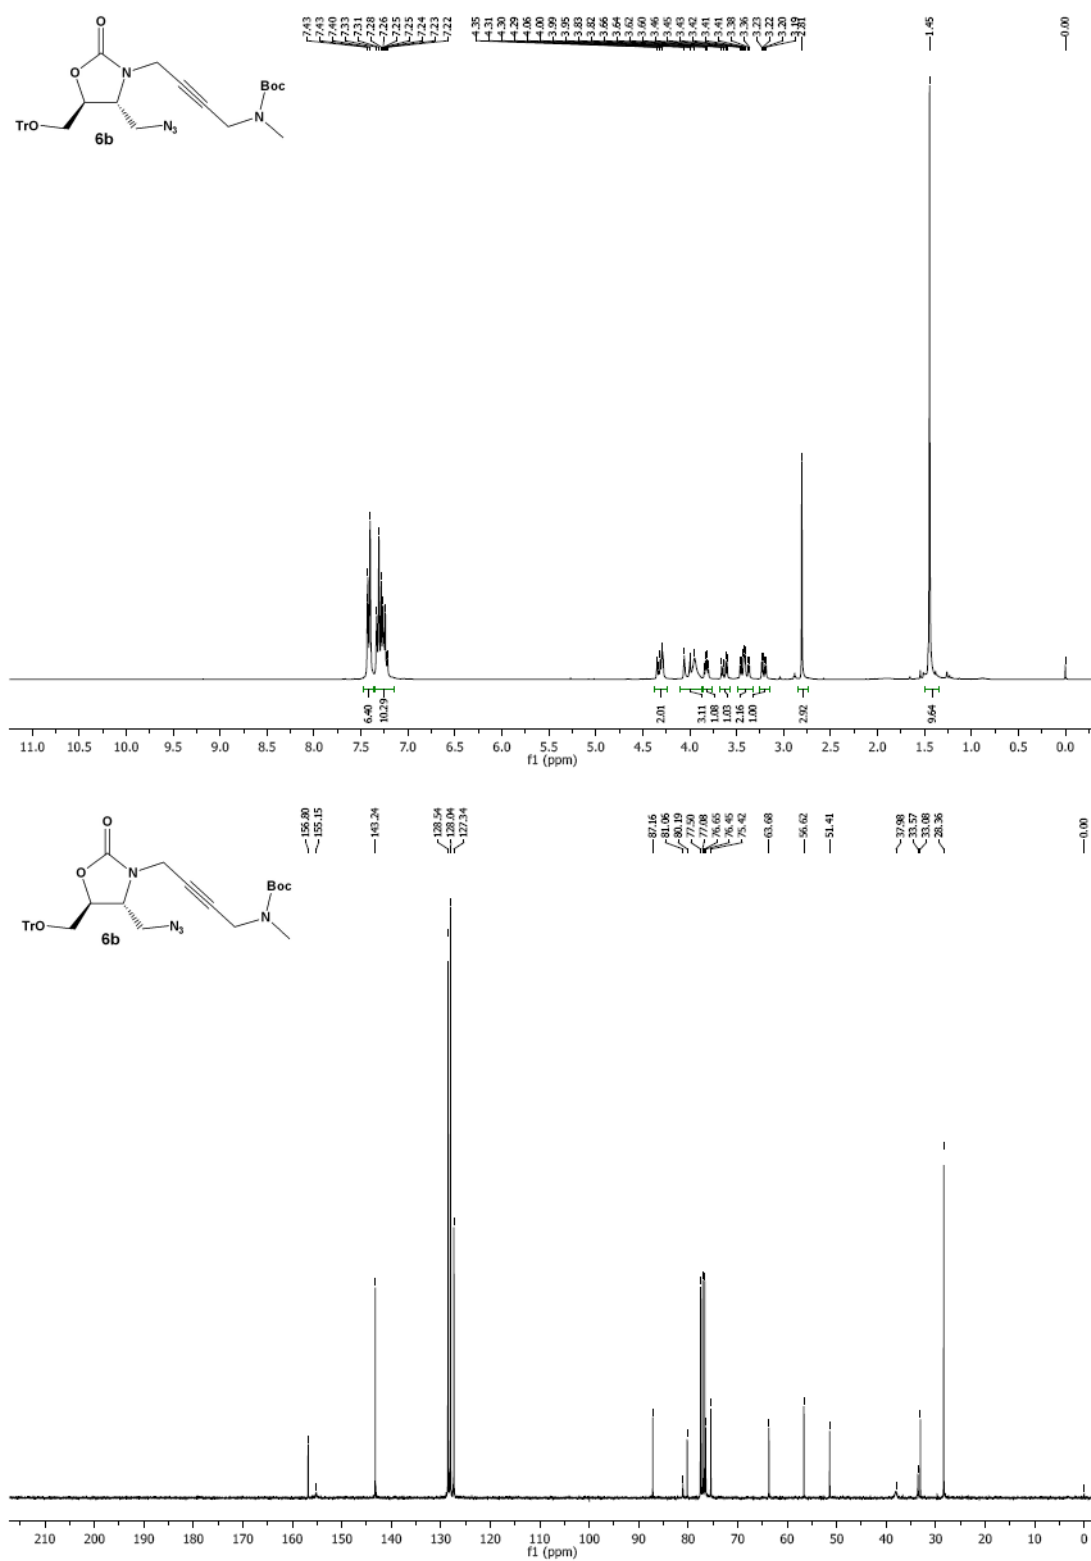

Figure 6.  $^1\text{H}$  and  $^{13}\text{C}$  NMR spectra for compound **6c** ( $\text{CDCl}_3$ )

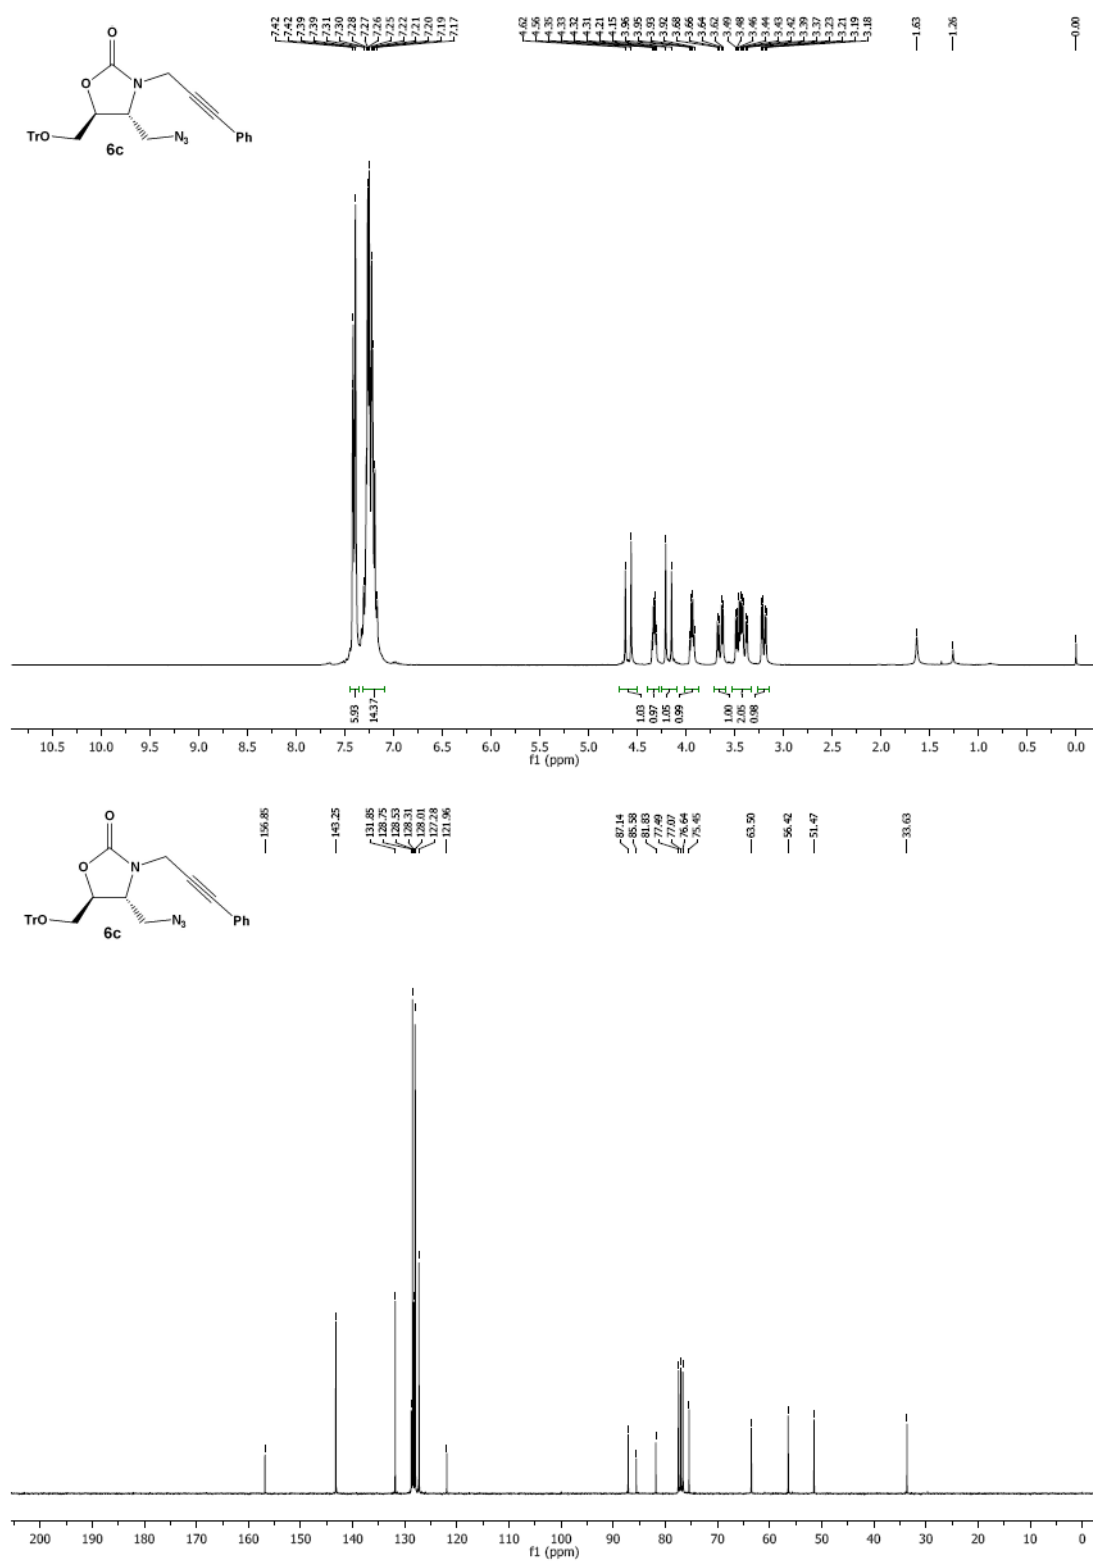



Figure 7.  $^1\text{H}$  and  $^{13}\text{C}$  NMR spectra for compound **6d** ( $\text{CDCl}_3$ )

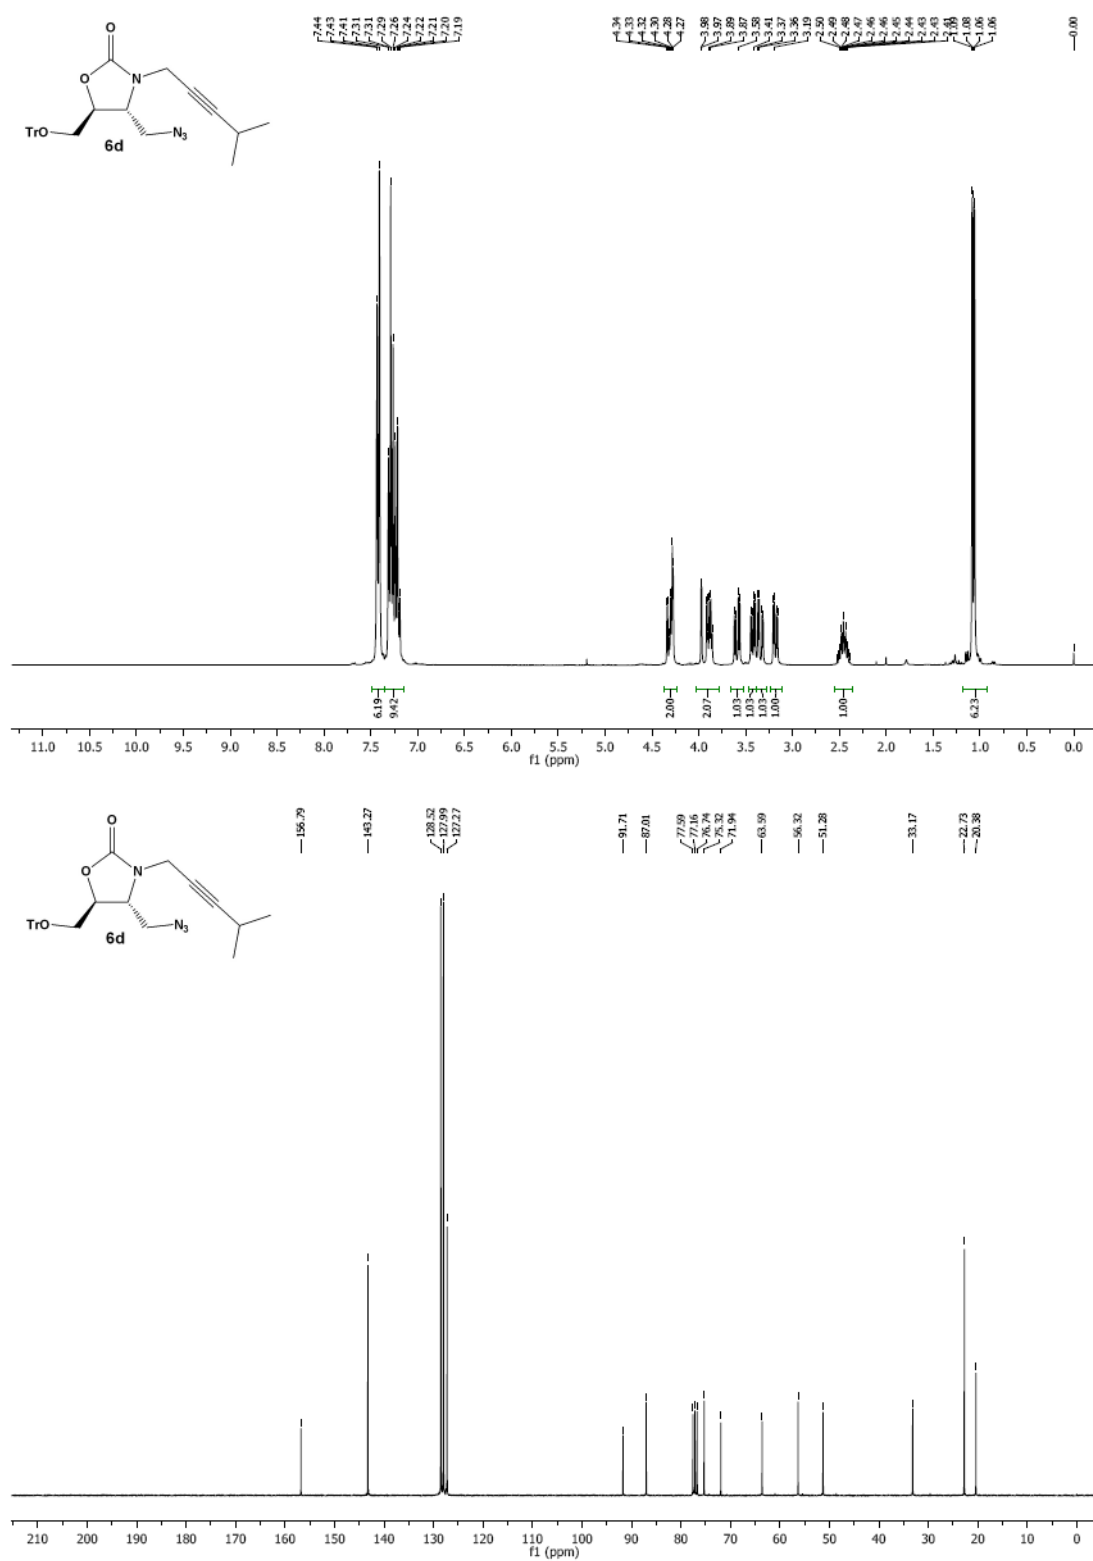

Figure 8.  $^1\text{H}$  and  $^{13}\text{C}$  NMR spectra for compound **6e** ( $\text{CDCl}_3$ )

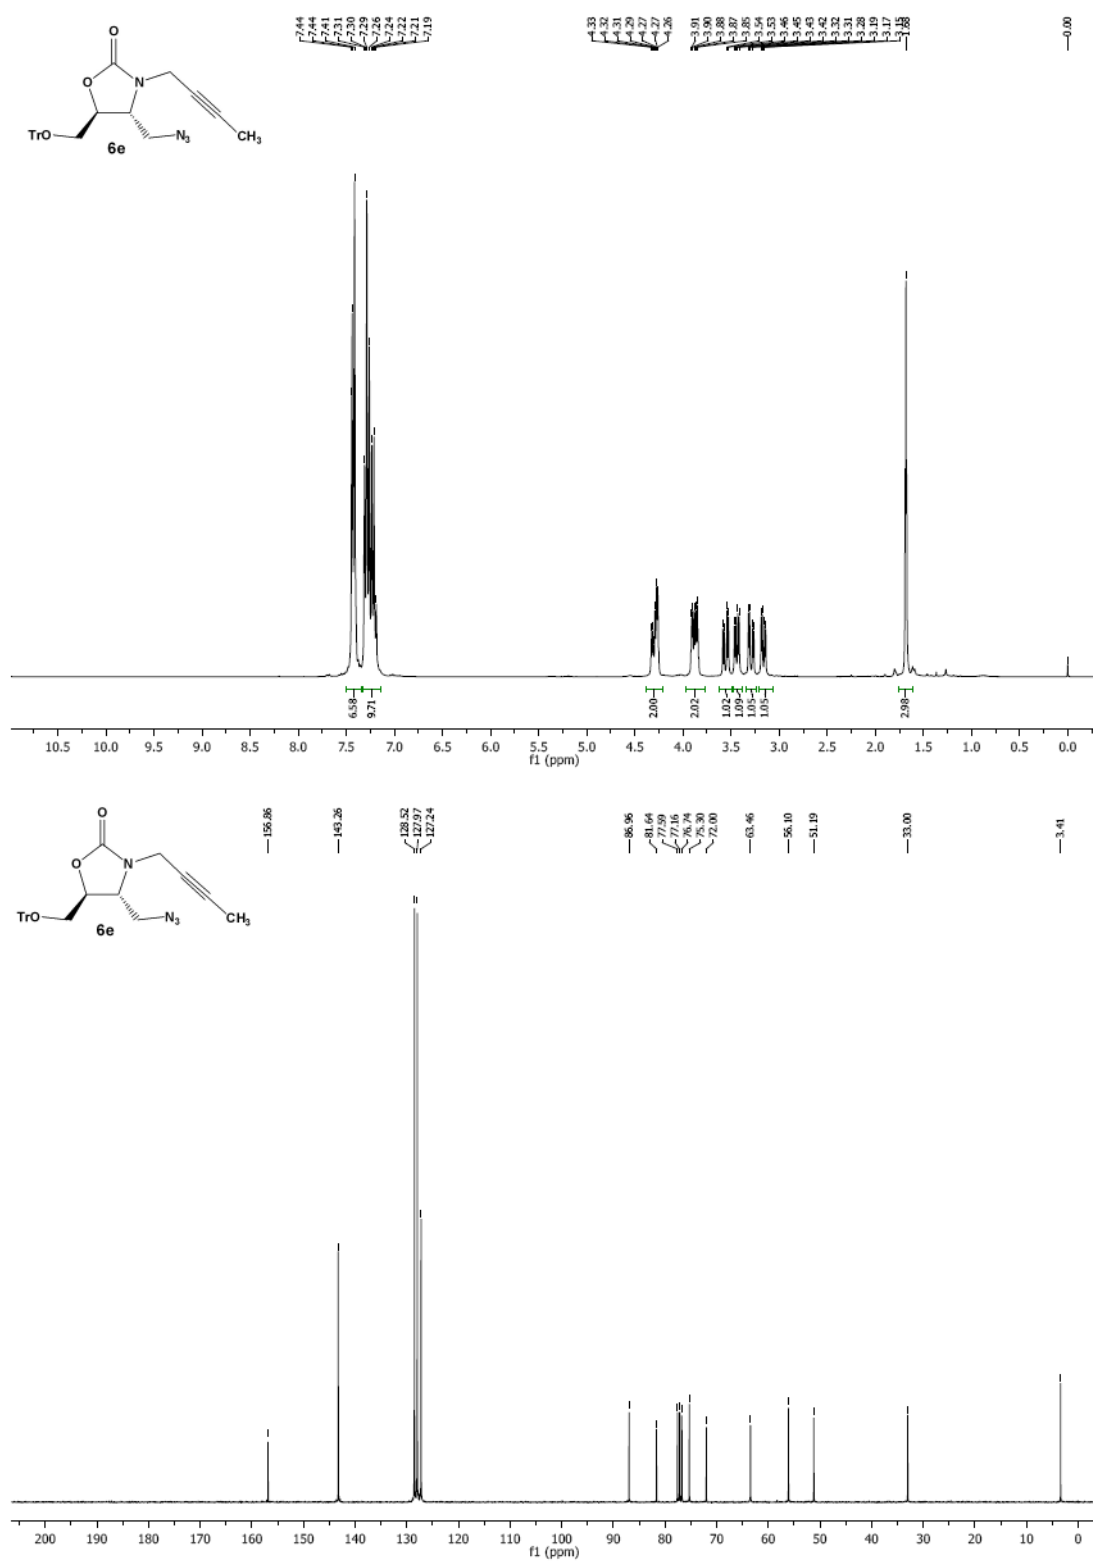

Figure 9.  $^1\text{H}$  and  $^{13}\text{C}$  NMR spectra for compound **6f** ( $\text{CDCl}_3$ )

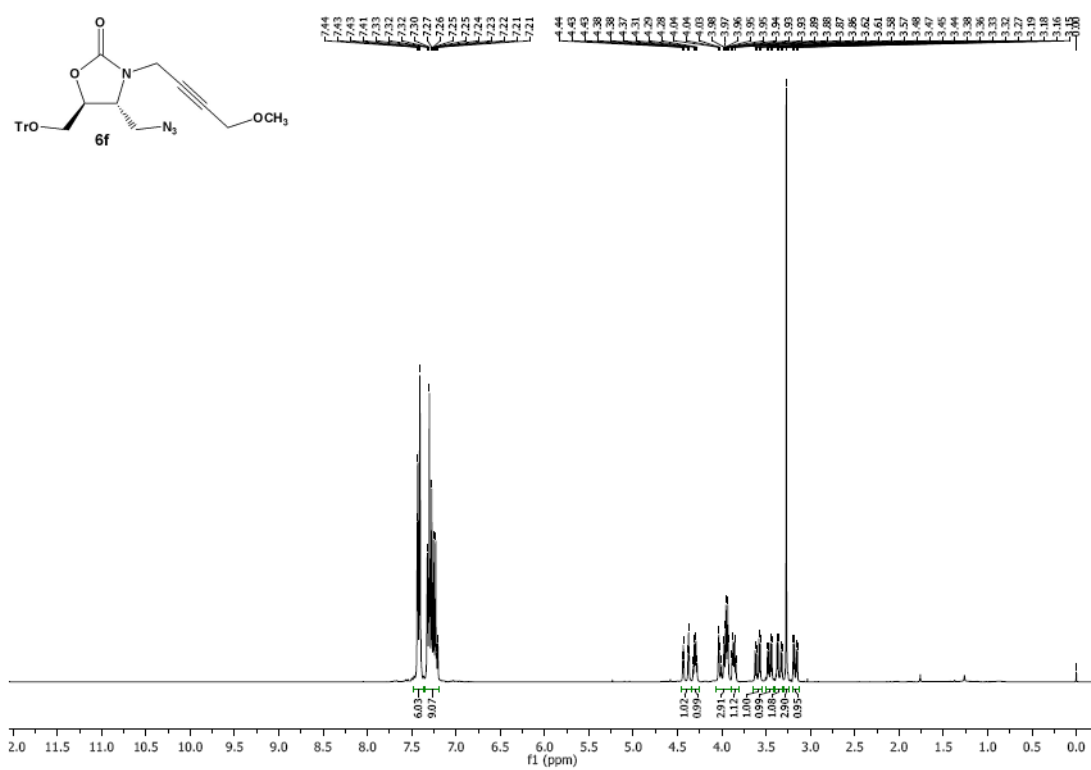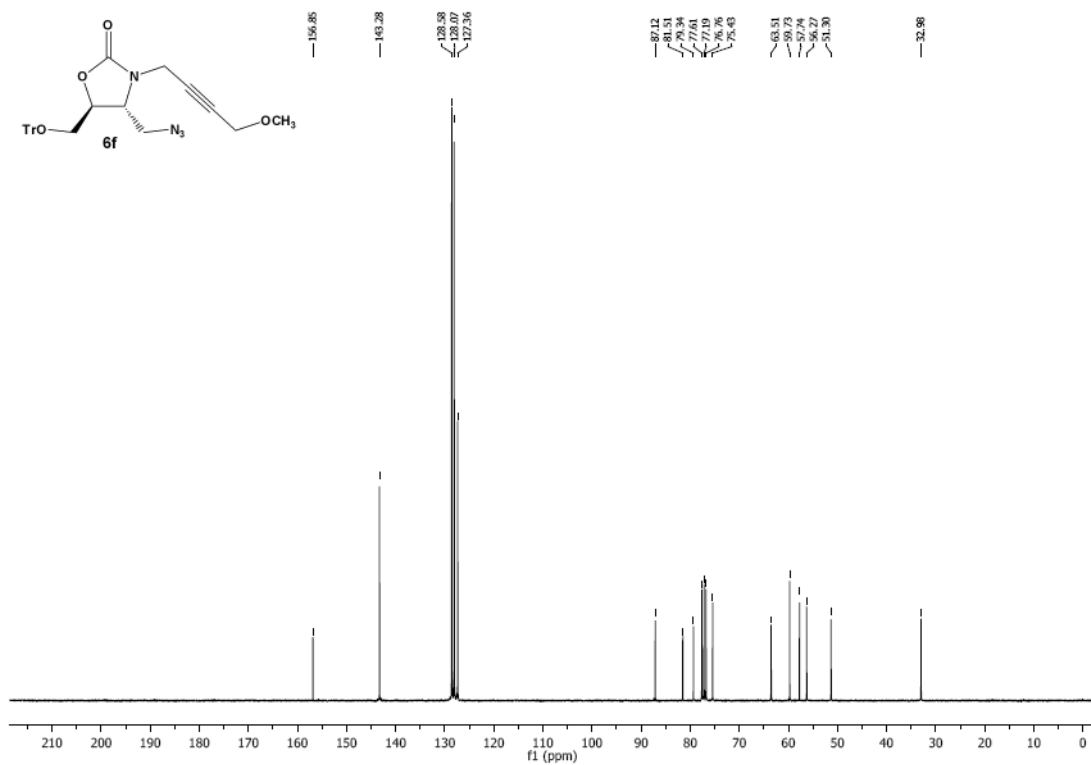

Figure 10.  $^1\text{H}$  and  $^{13}\text{C}$  NMR spectra for compound **6g** ( $\text{CDCl}_3$ )

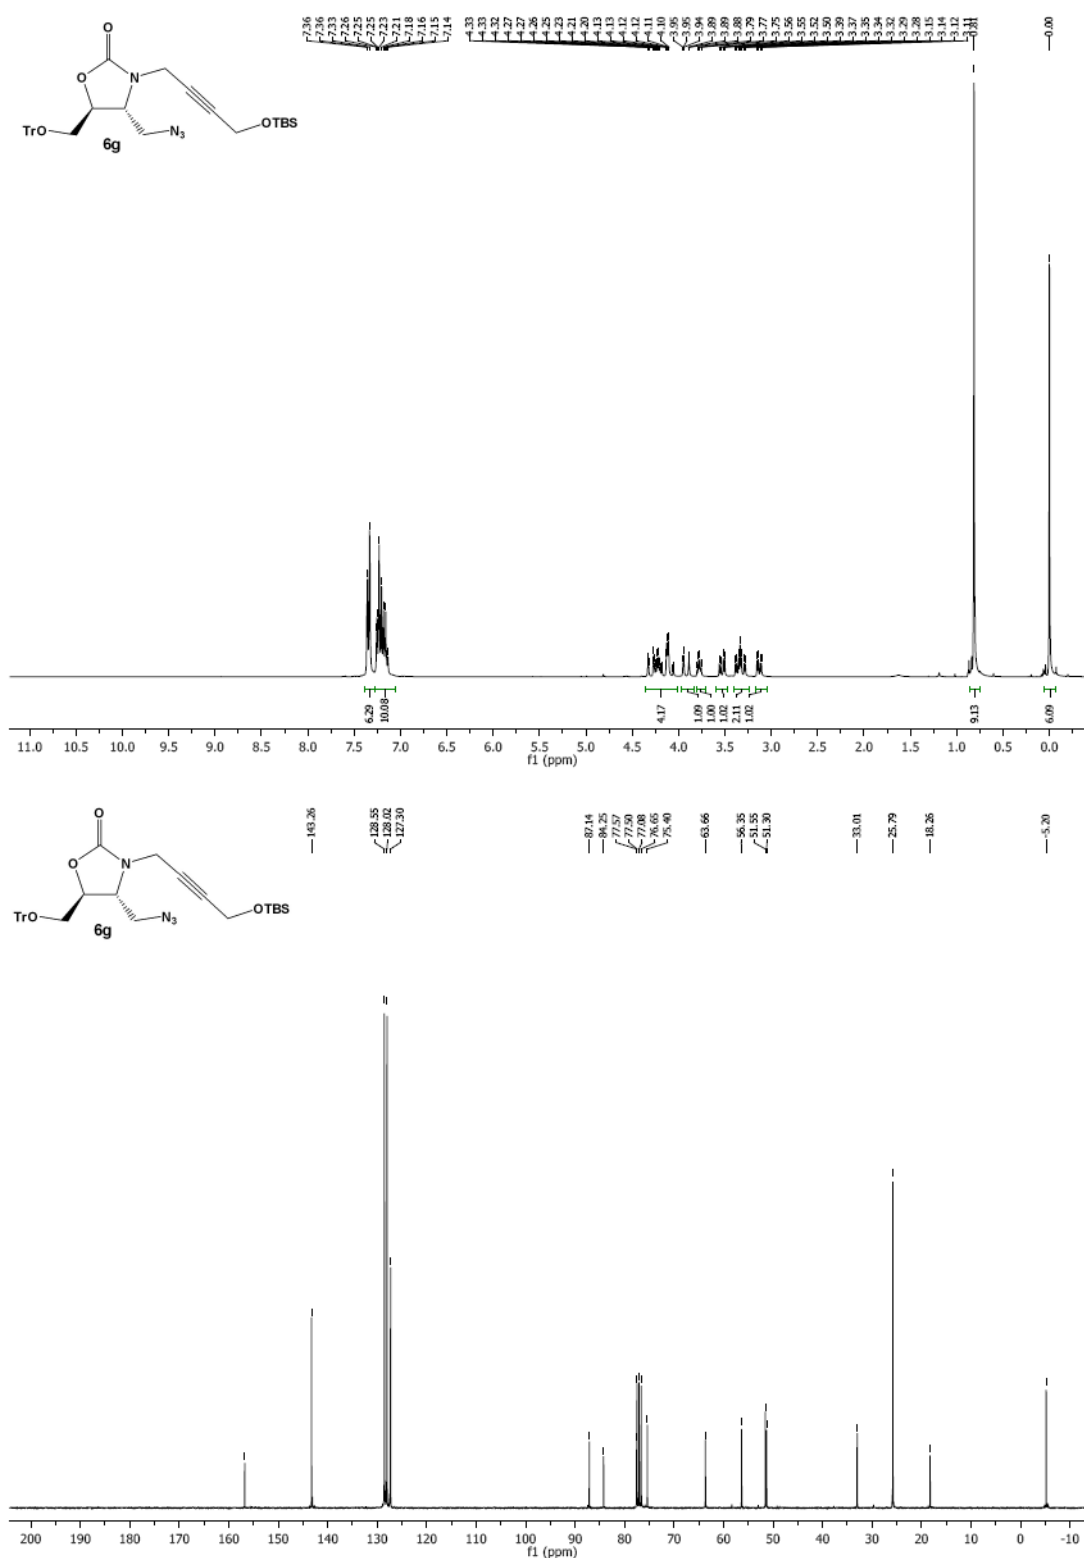

Figure 11.  $^1\text{H}$  and  $^{13}\text{C}$  NMR spectra for compound **6i** ( $\text{CDCl}_3$ )

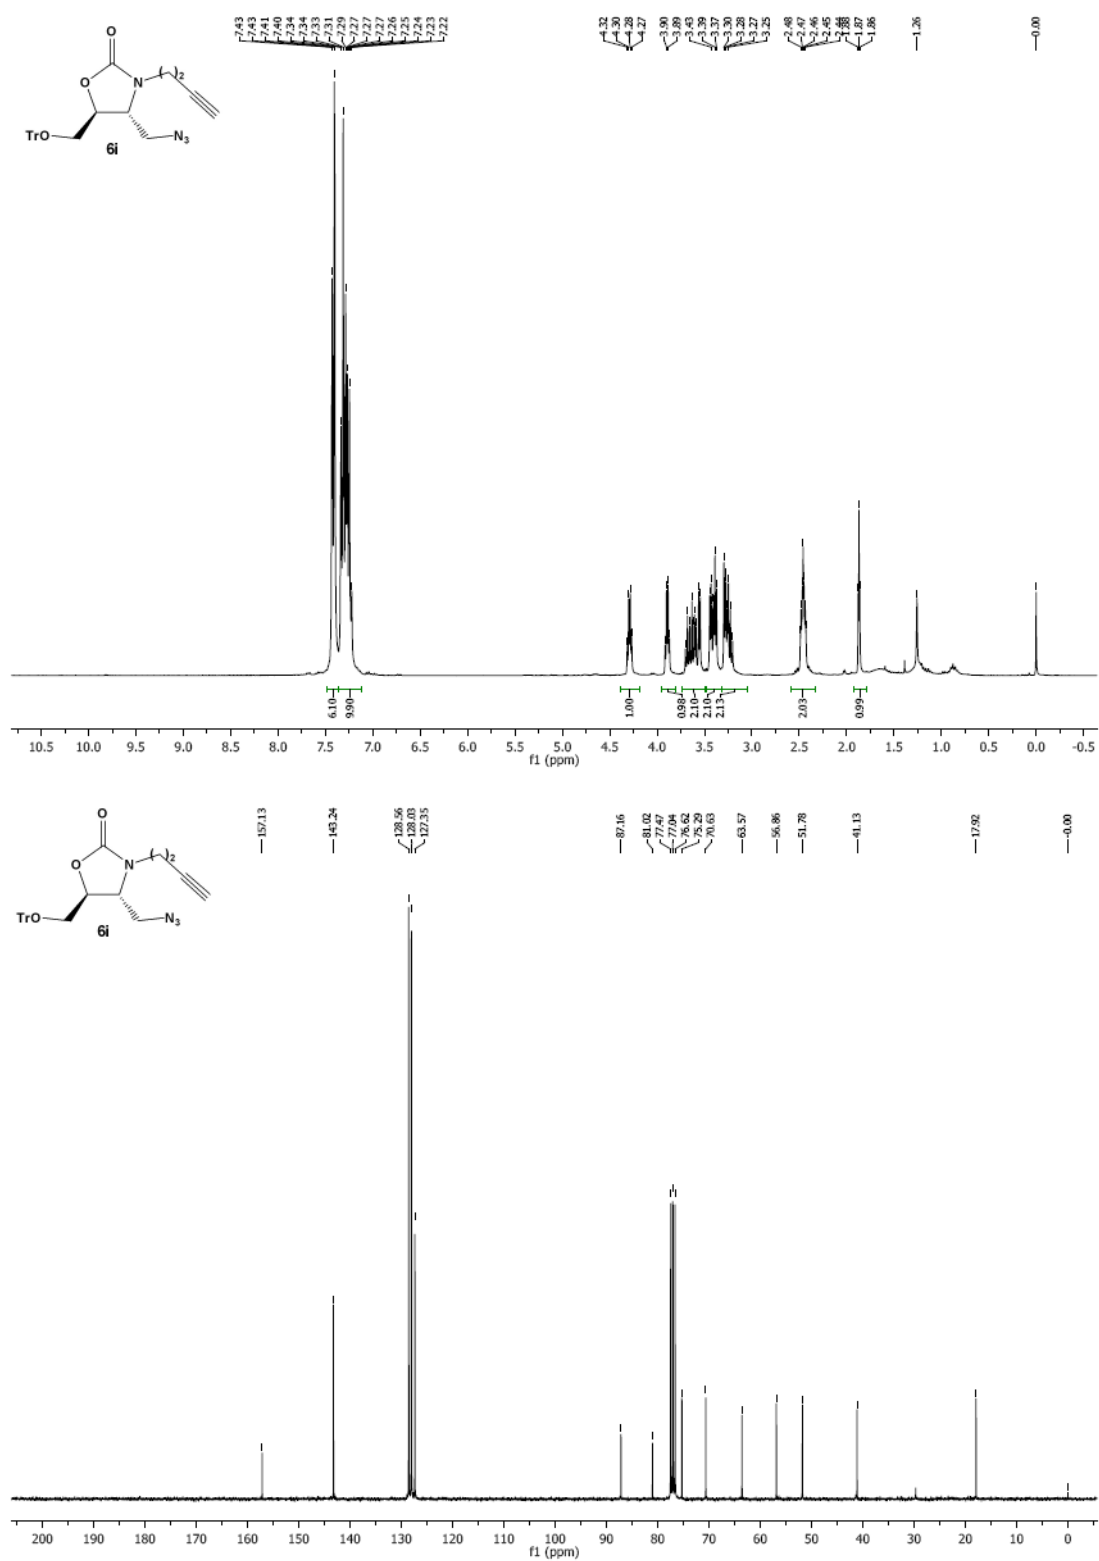

Figure 12.  $^1\text{H}$  and  $^{13}\text{C}$  NMR spectra for compound **6j** ( $\text{CDCl}_3$ )

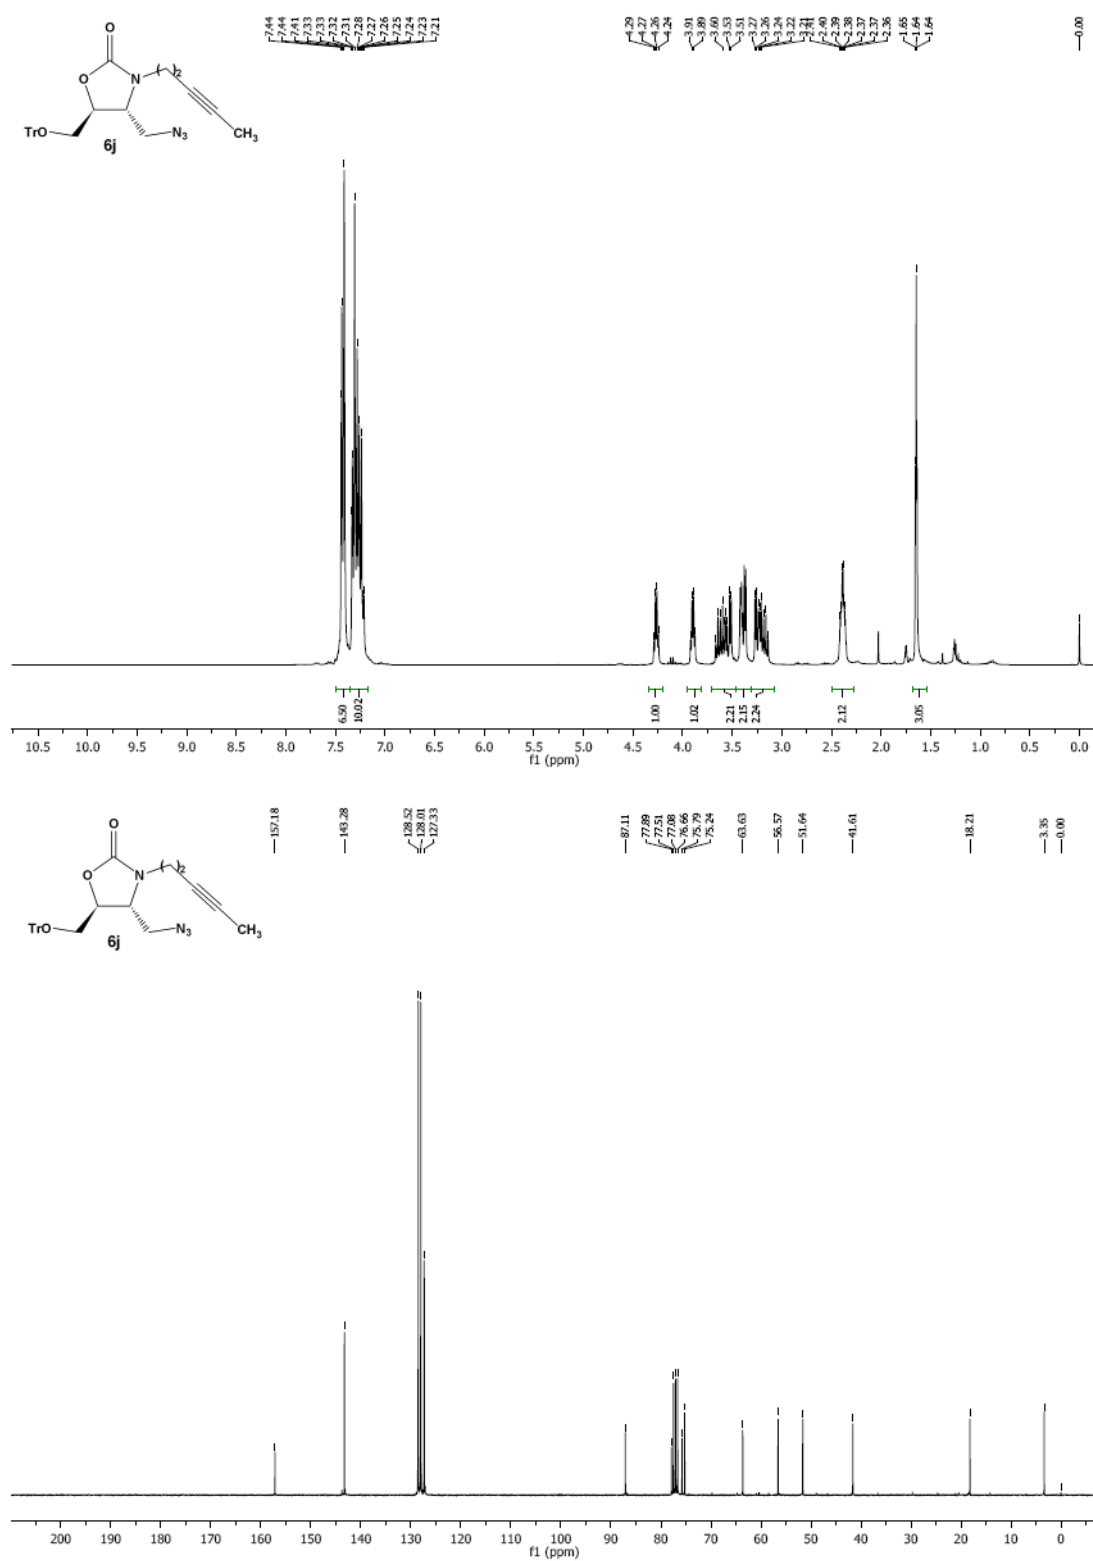

Figure 13.  $^1\text{H}$  and  $^{13}\text{C}$  NMR spectra for compound **6k** ( $\text{CDCl}_3$ )

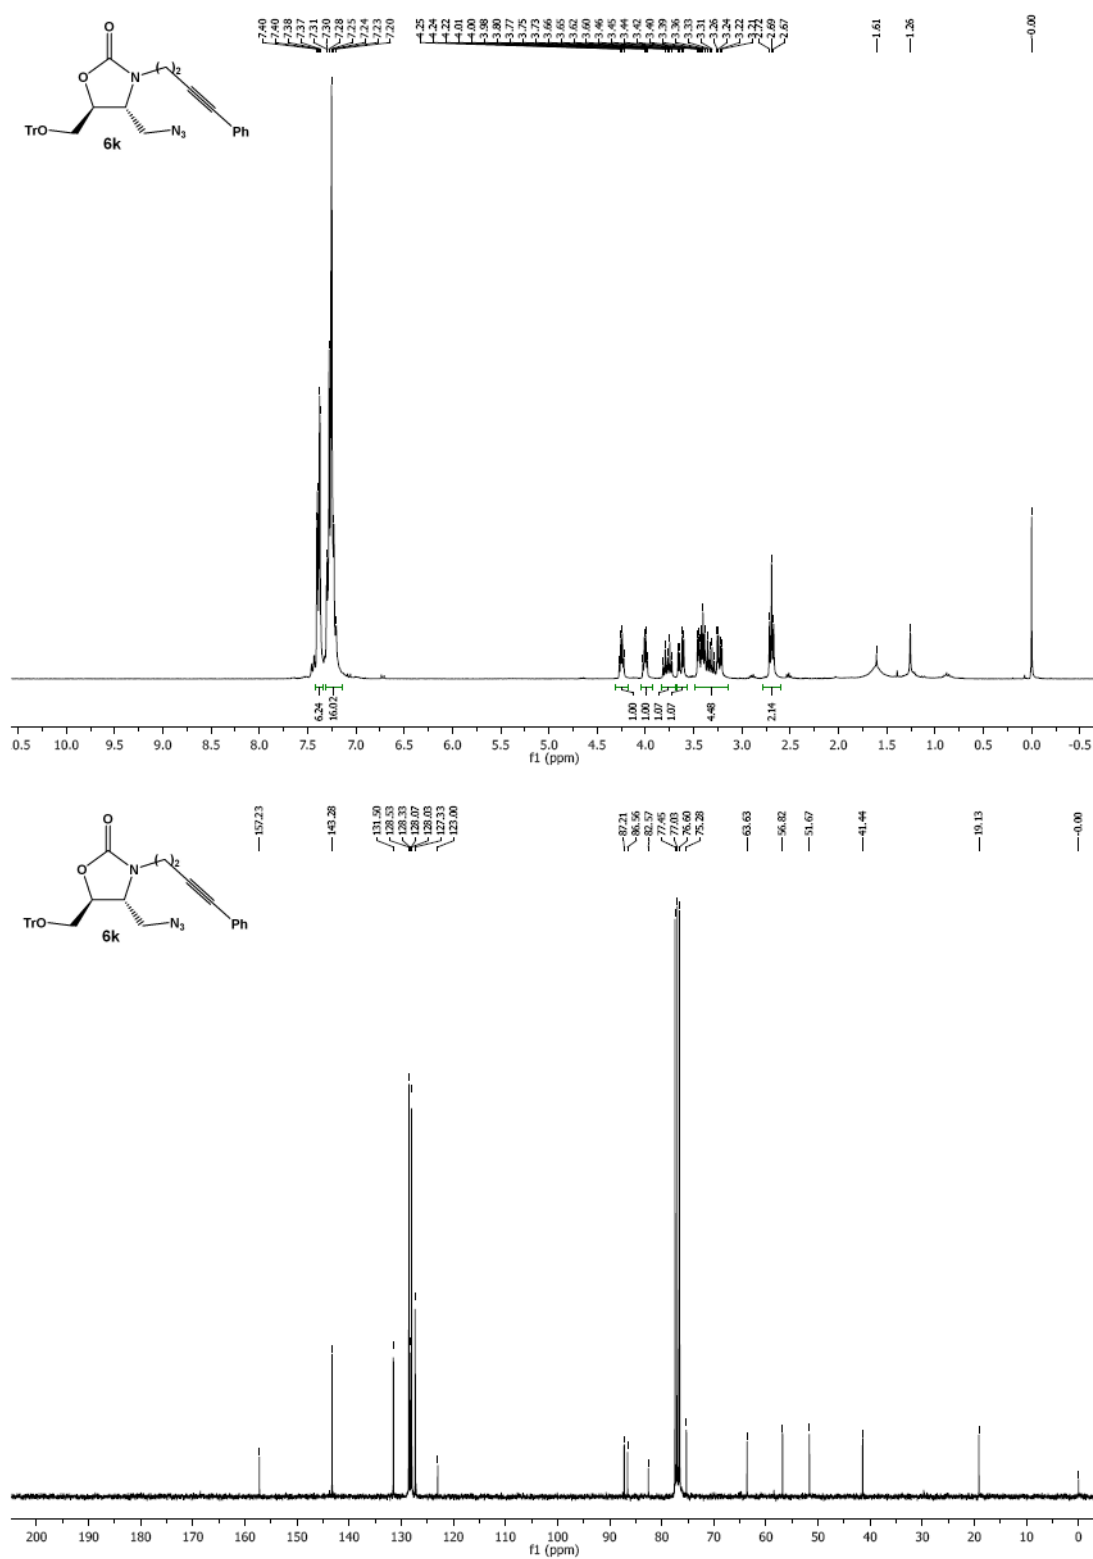

Figure 14.  $^1\text{H}$  and  $^{13}\text{C}$  NMR spectra for compound **61** ( $\text{CDCl}_3$ )

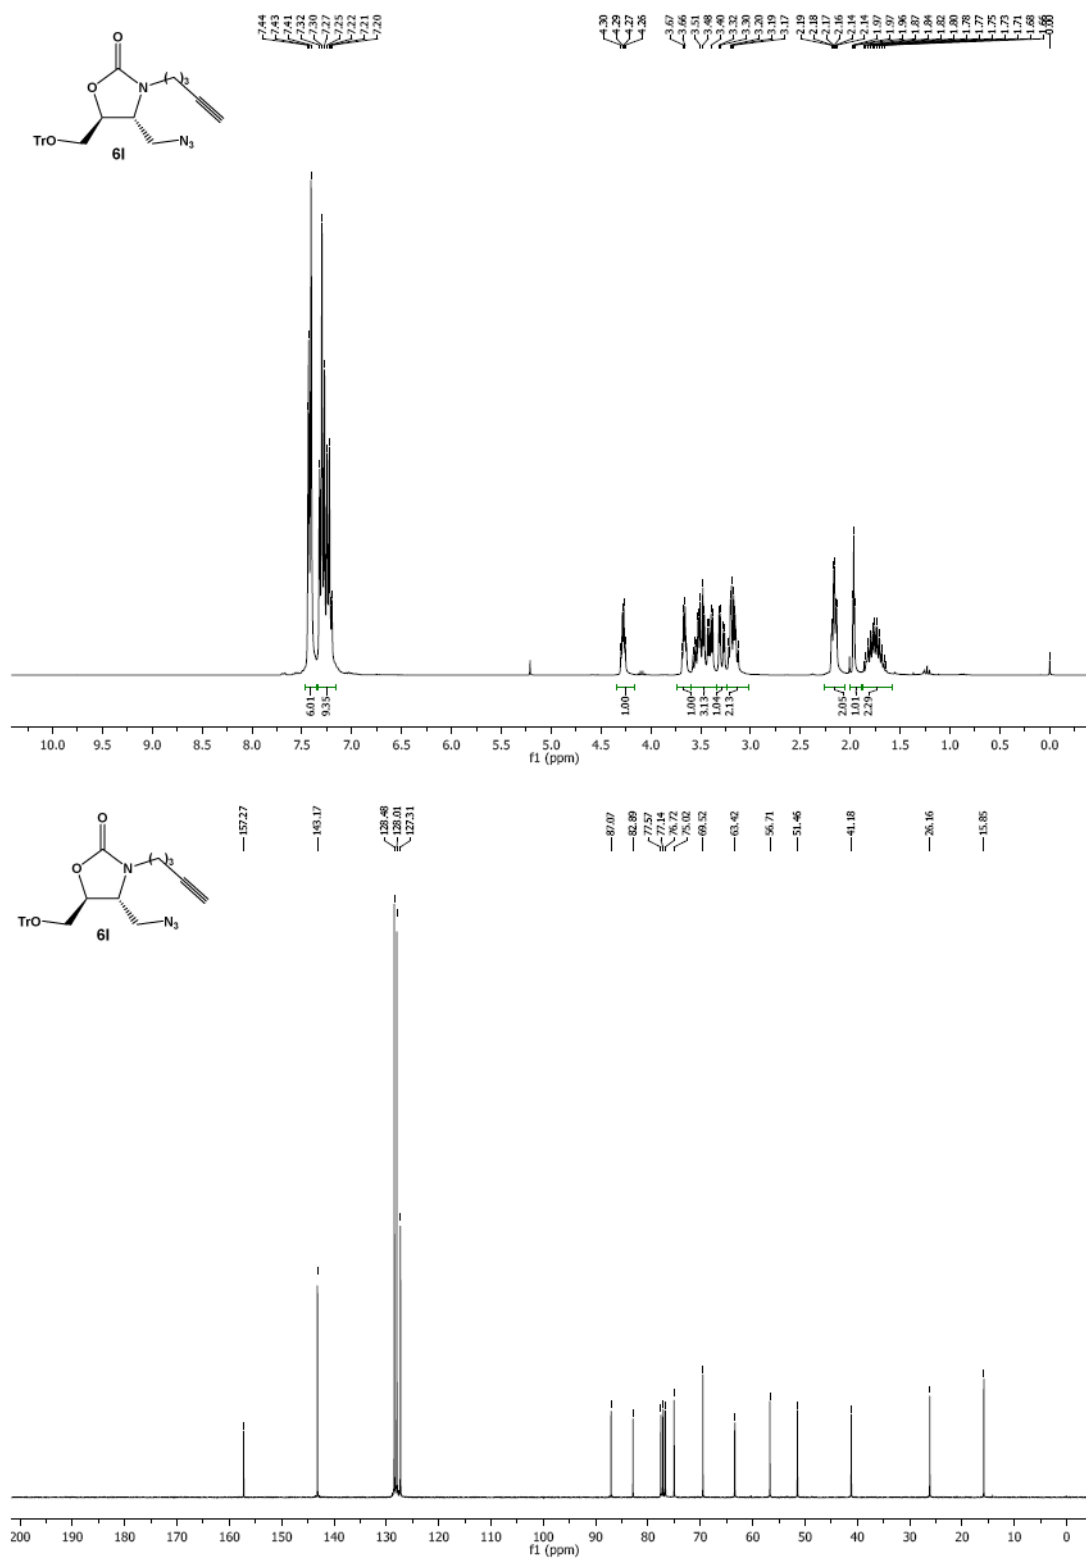



Figure 15.  $^1\text{H}$  and  $^{13}\text{C}$  NMR spectra for compound **6m** ( $\text{CDCl}_3$ )

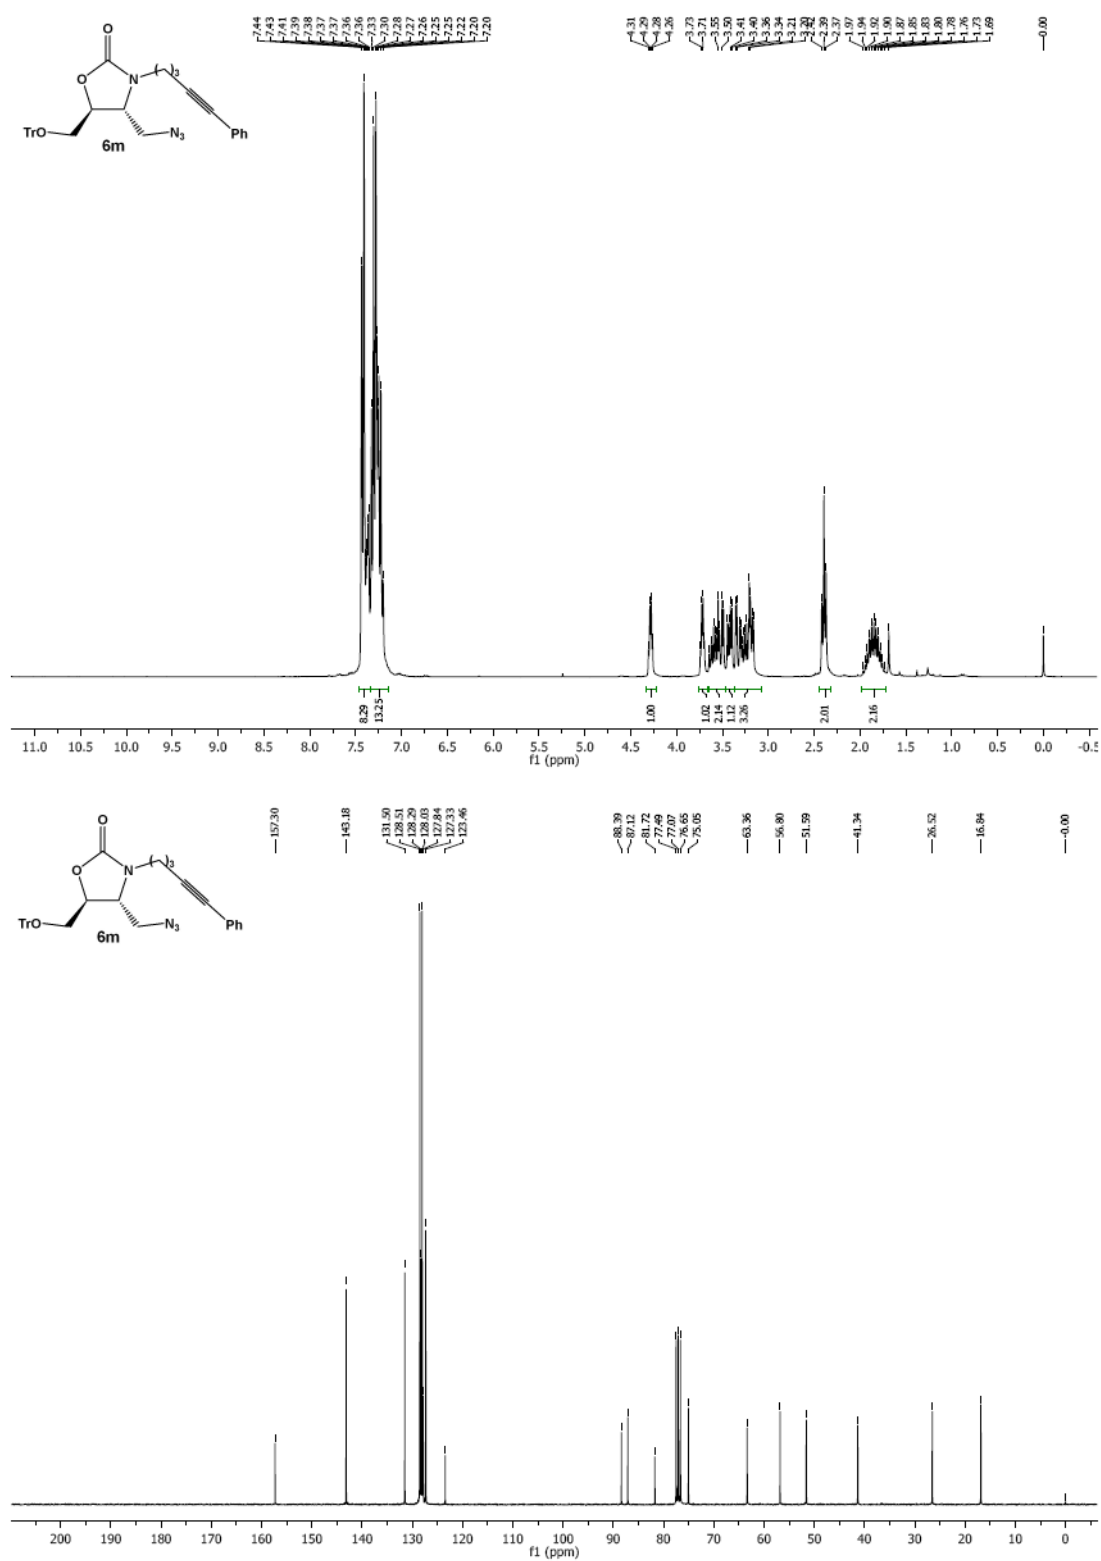

Figure 16.  $^1\text{H}$  and  $^{13}\text{C}$  NMR spectra for compound **6n** ( $\text{CDCl}_3$ )

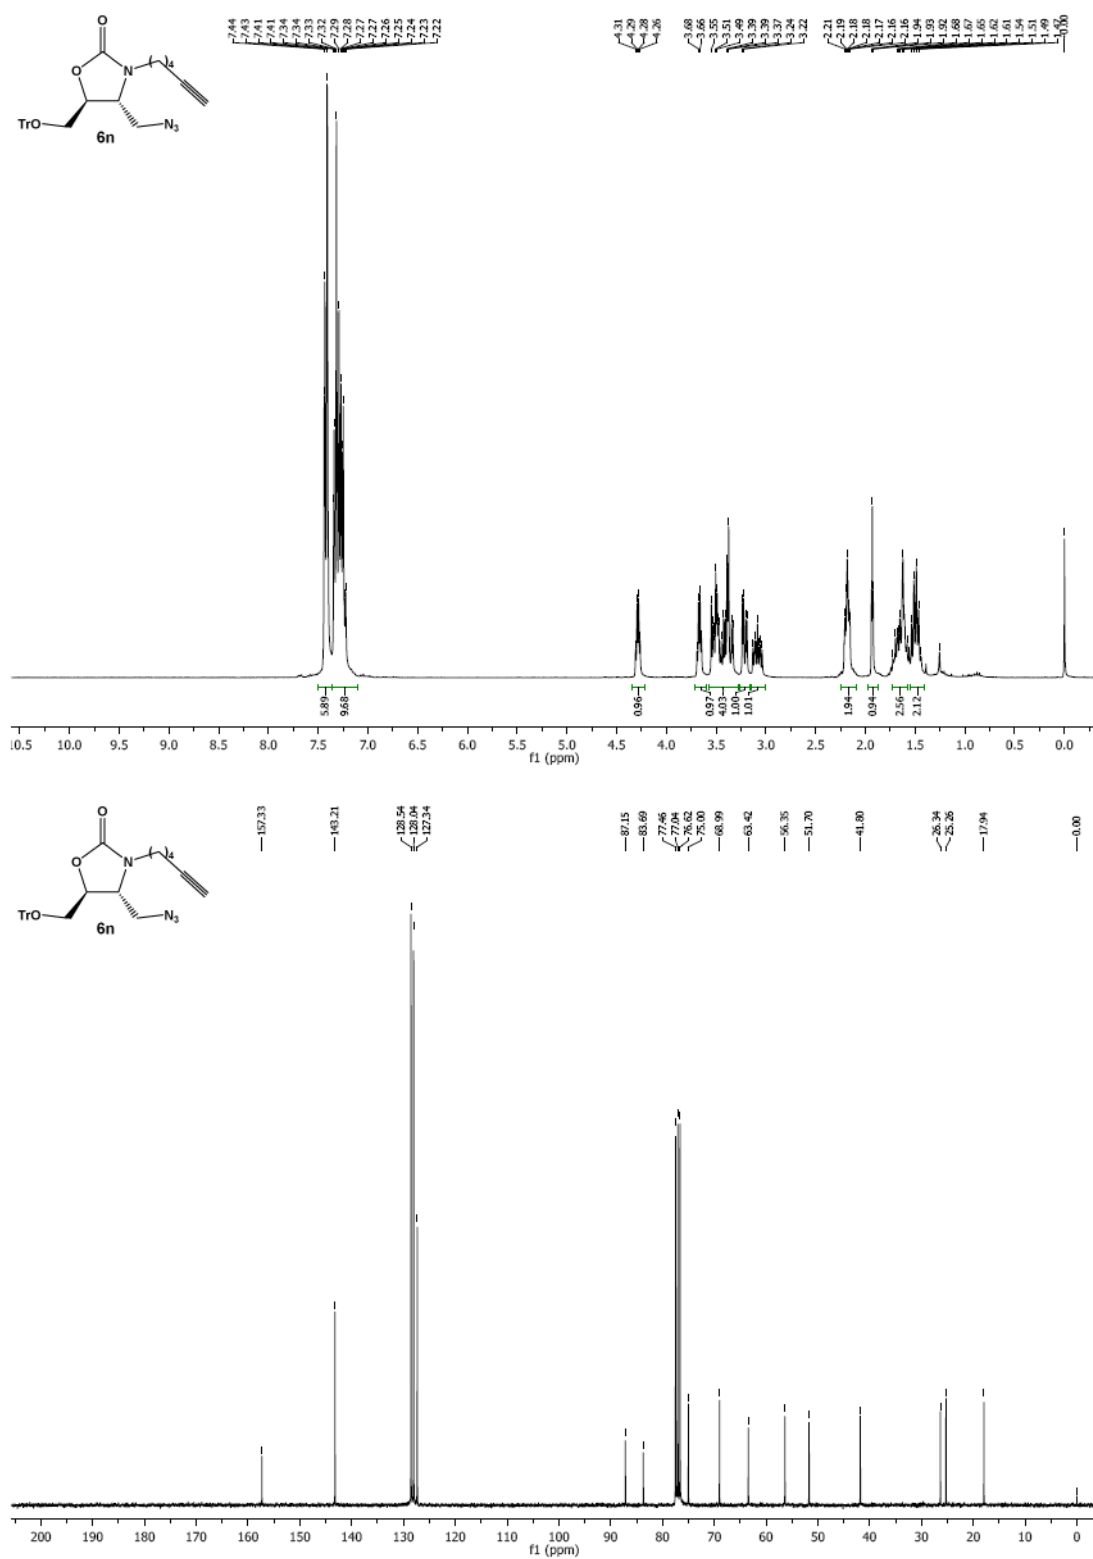

Figure 17.  $^1\text{H}$  and  $^{13}\text{C}$  NMR spectra for compound **6o** ( $\text{CDCl}_3$ )

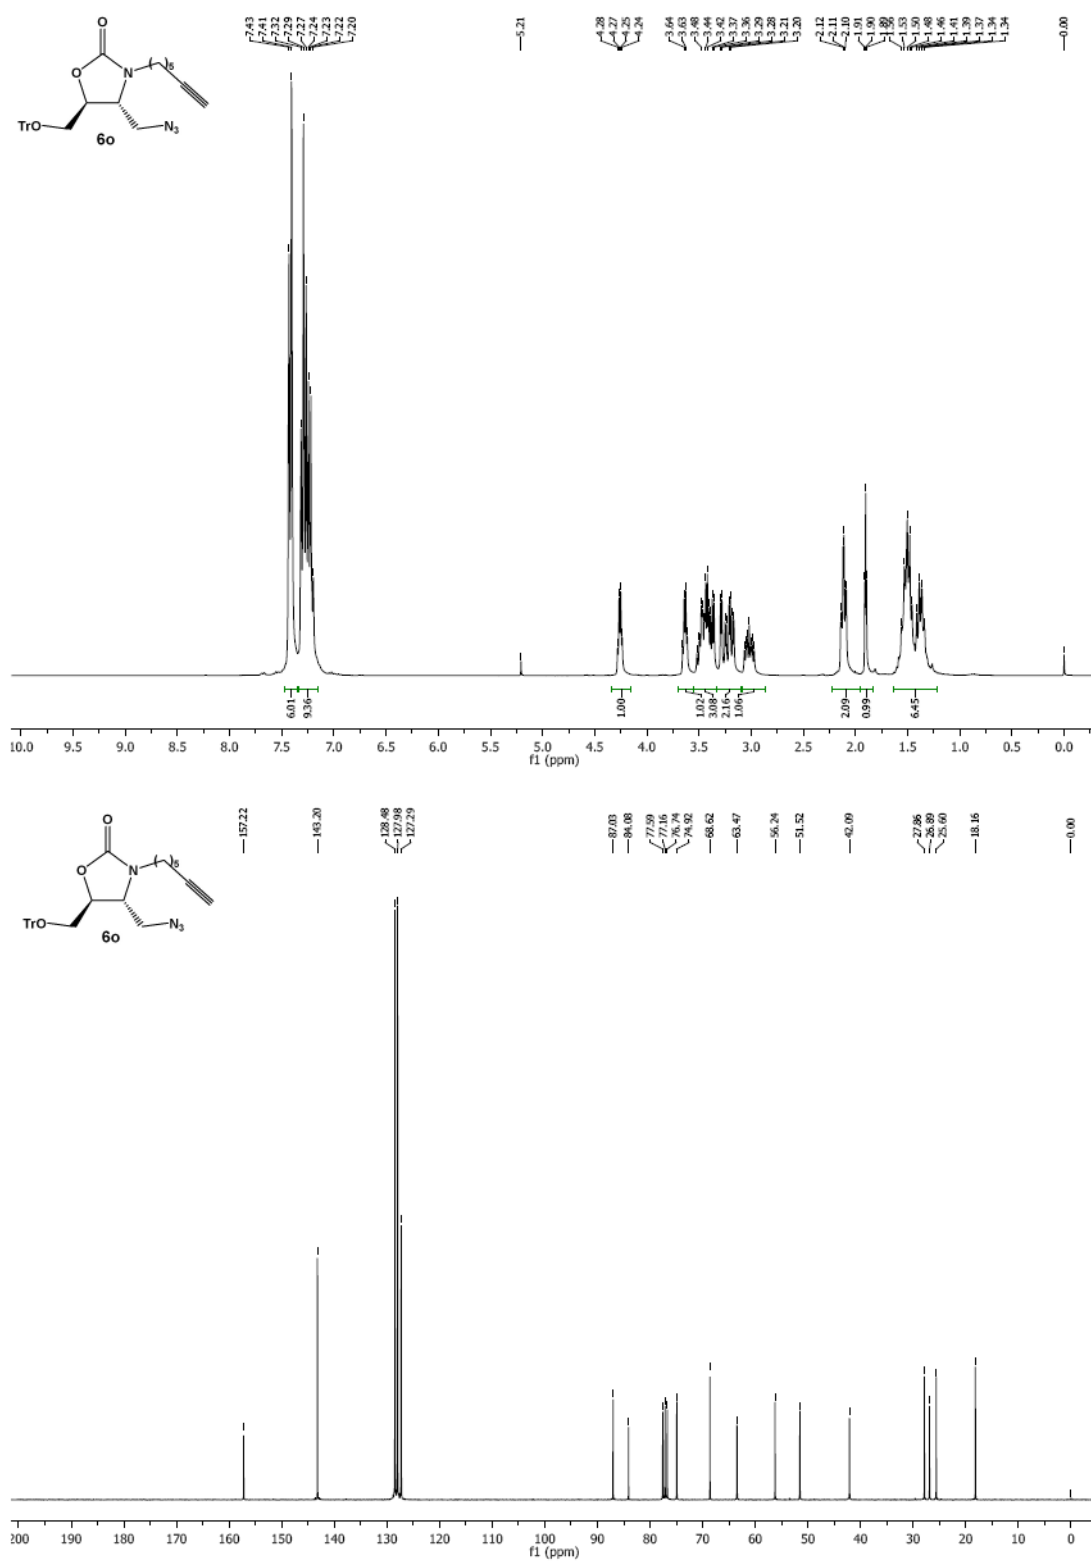

Figure 18.  $^1\text{H}$  and  $^{13}\text{C}$  NMR spectra for compound **6p** ( $\text{CDCl}_3$ )

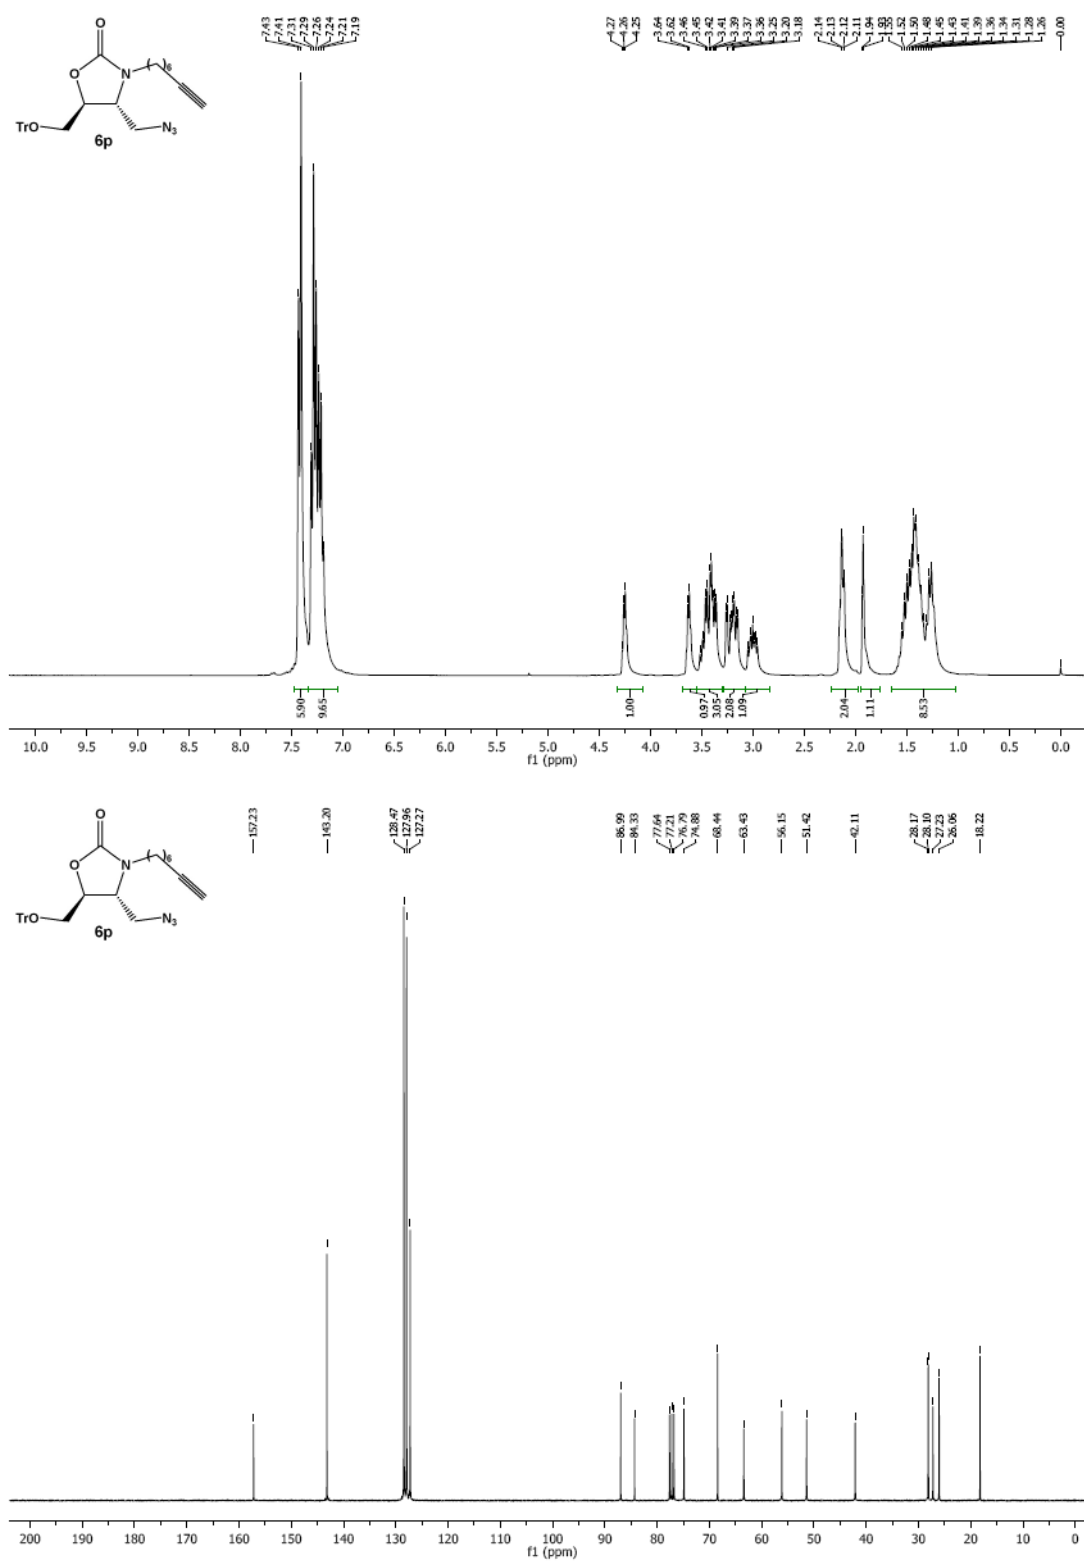

Figure 19.  $^1\text{H}$  and  $^{13}\text{C}$  NMR spectra for compound **6q** ( $\text{CDCl}_3$ )

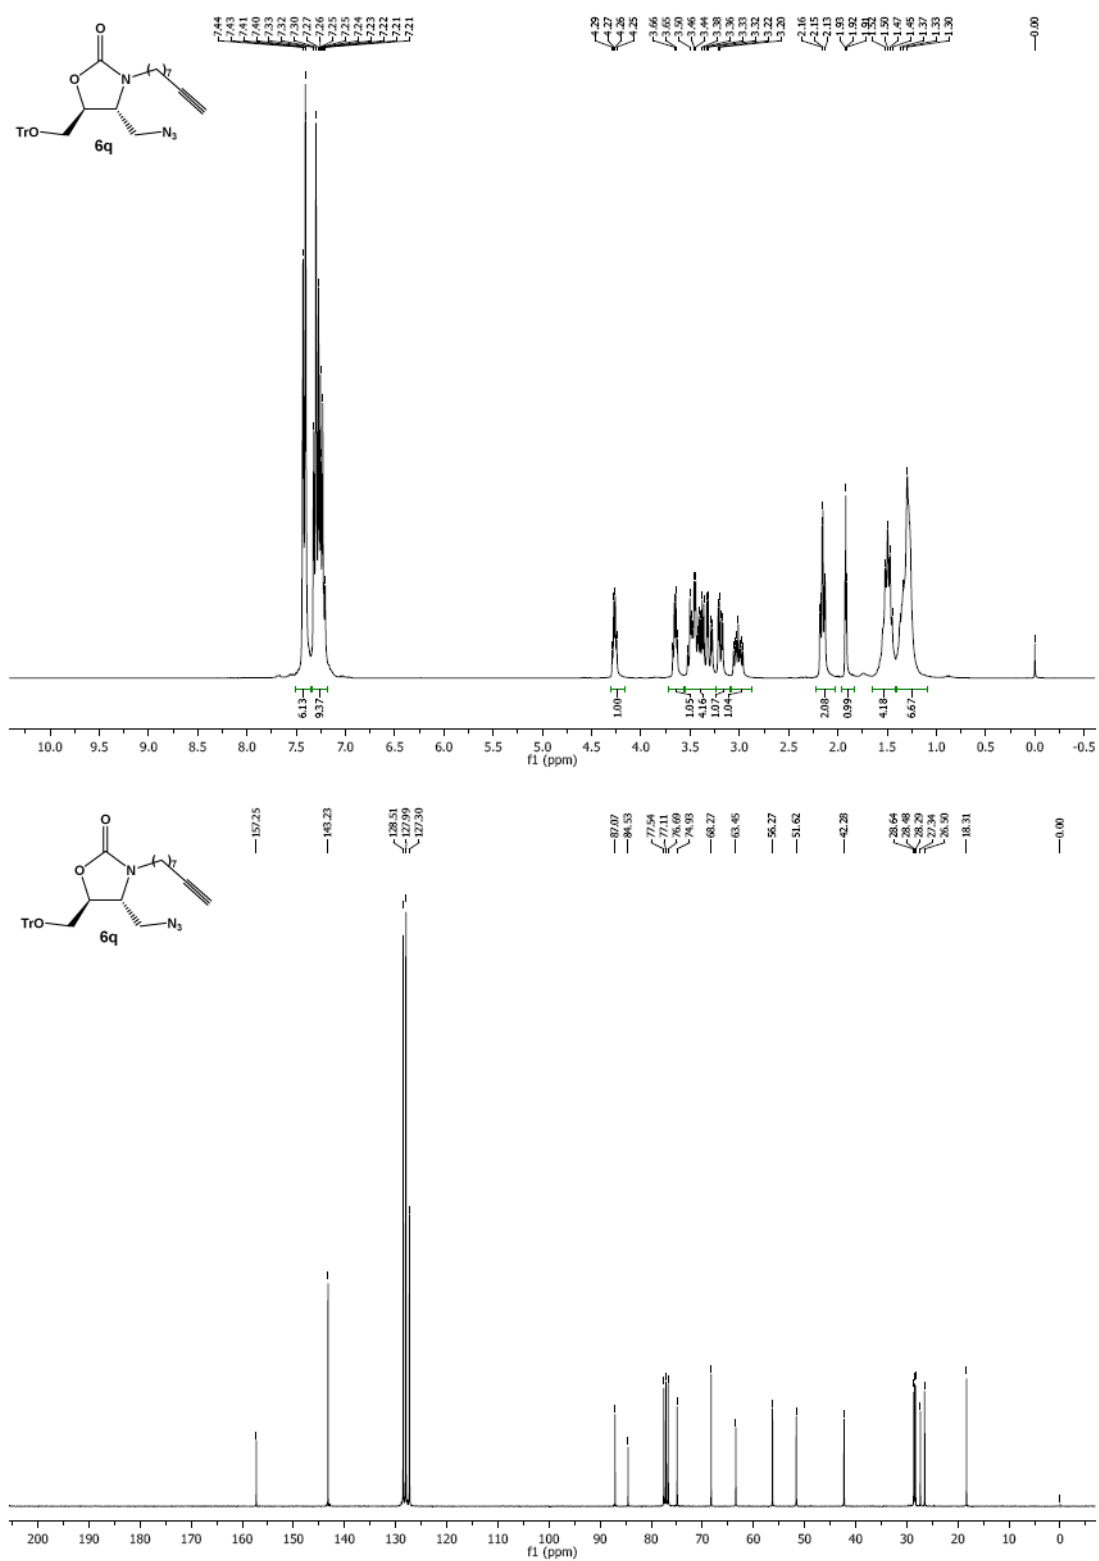

Figure 20. <sup>1</sup>H and <sup>13</sup>C NMR spectra for compound **6r** (CDCl<sub>3</sub>)

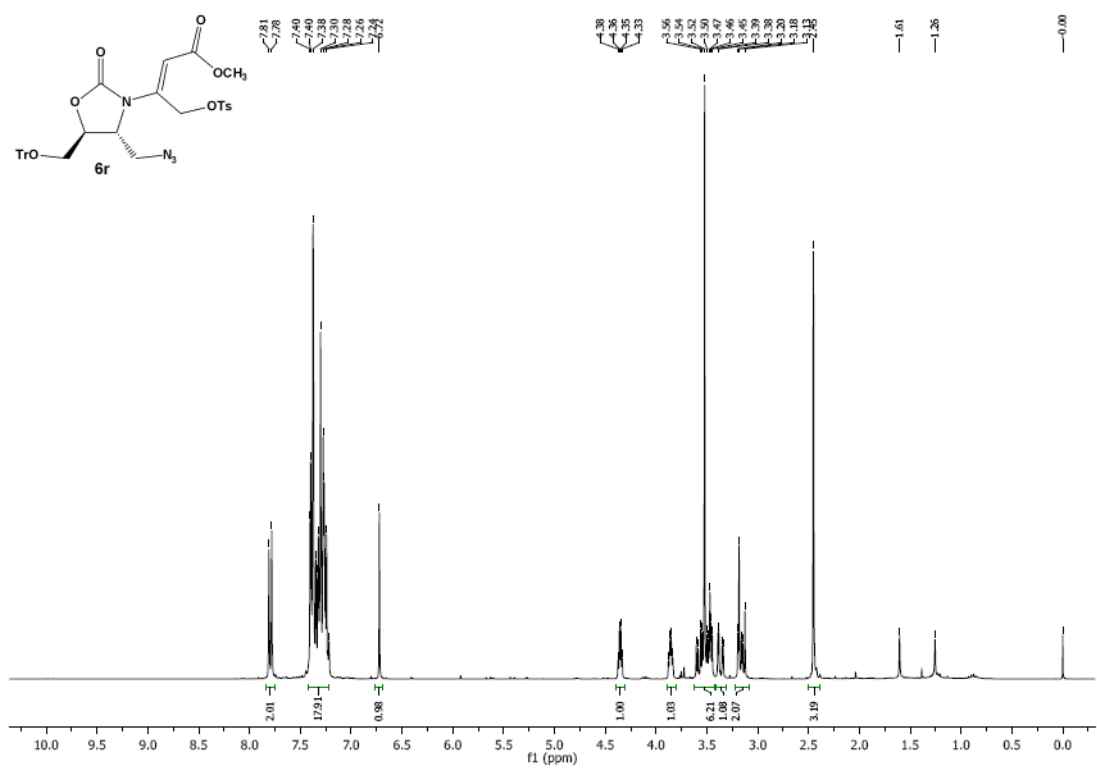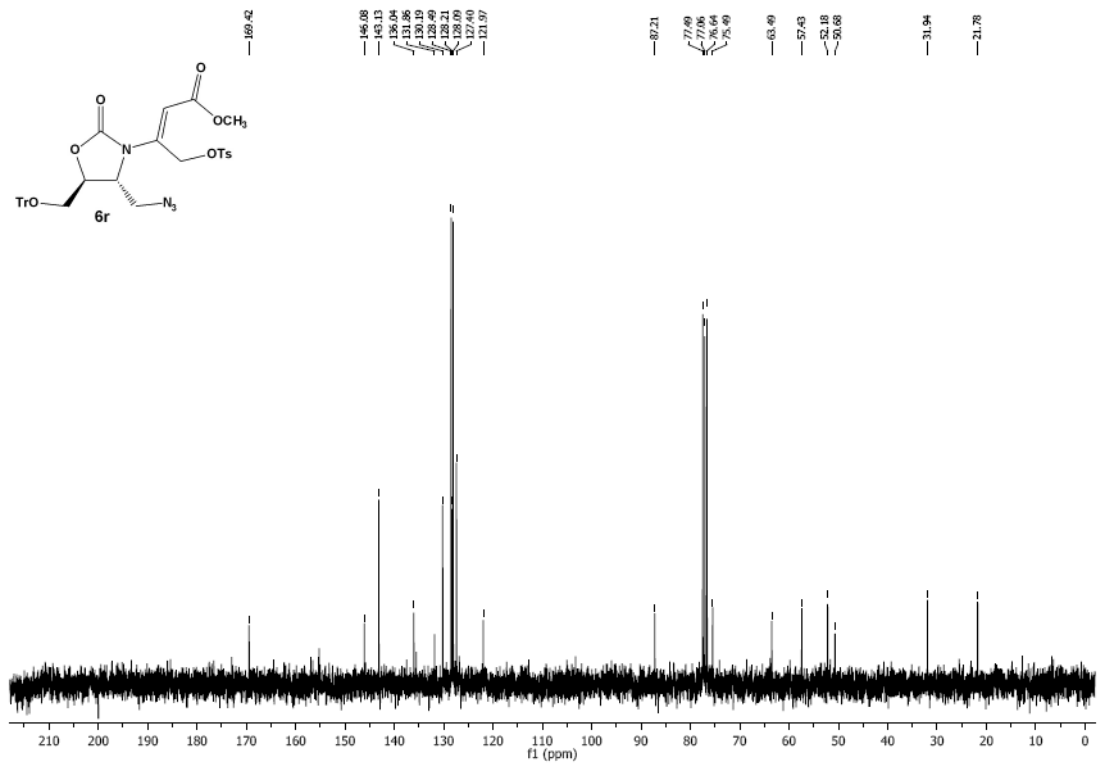

Figure 21.  $^1\text{H}$  and  $^{13}\text{C}$  NMR spectra for compound **7a** ( $\text{CDCl}_3$ )

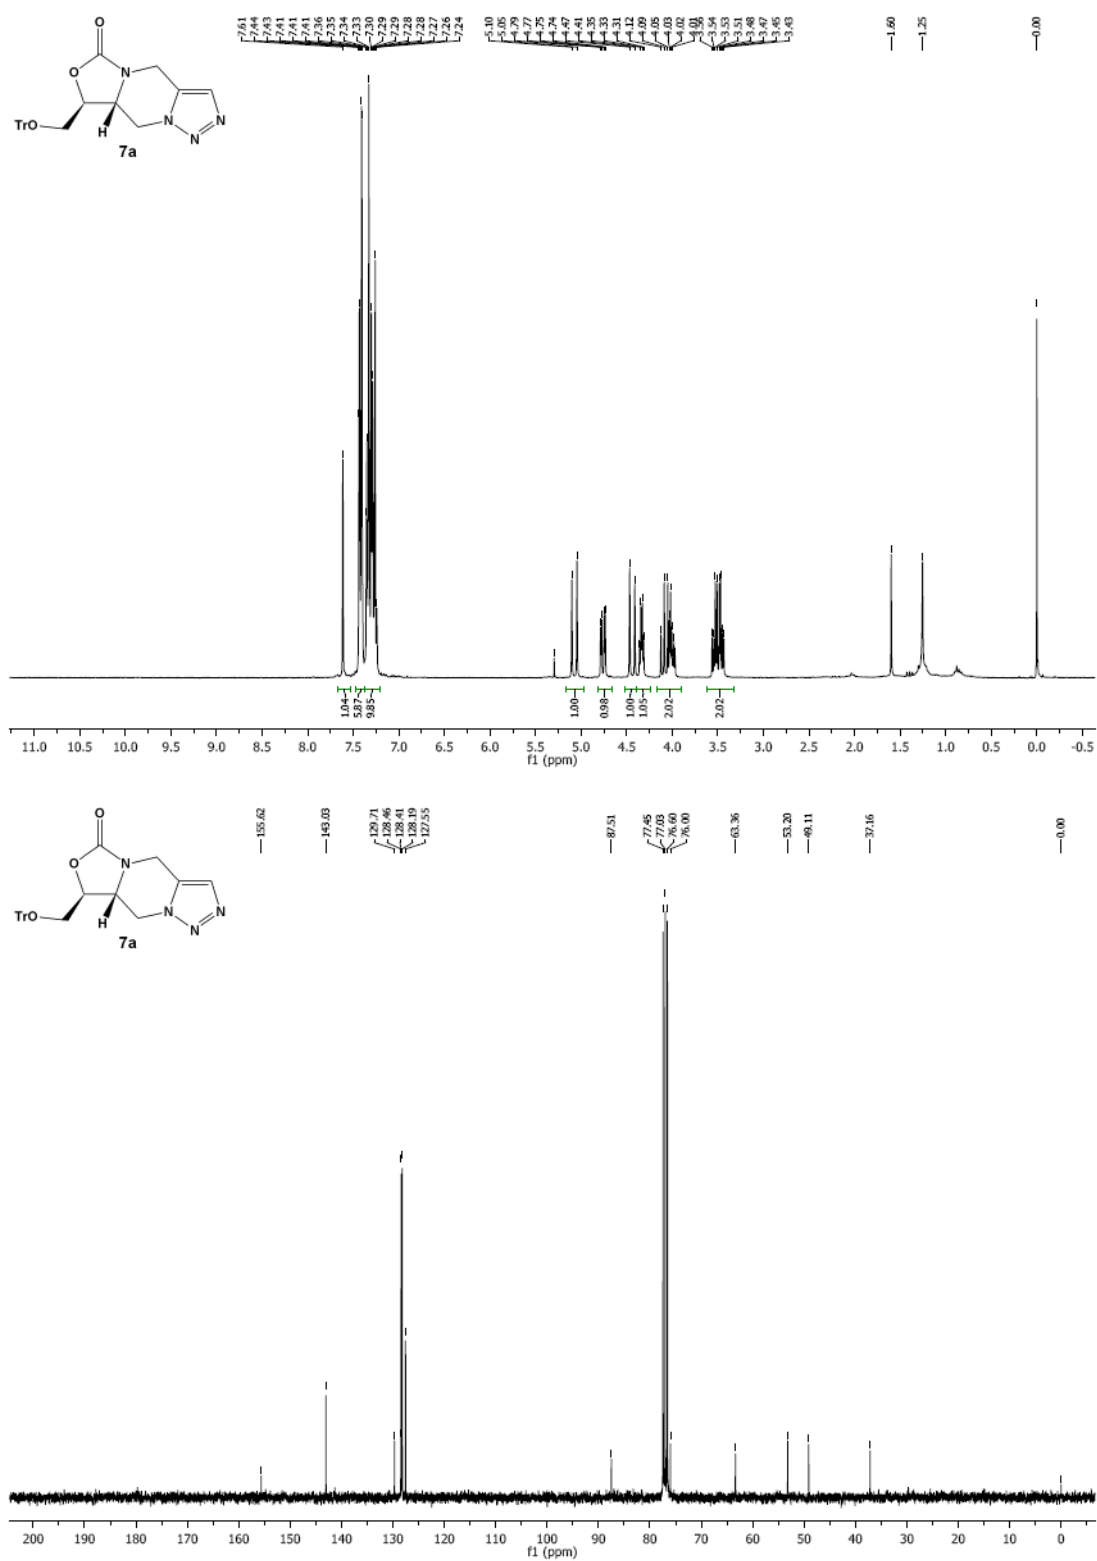

Figure 22.  $^1\text{H}$  and  $^{13}\text{C}$  NMR spectra for compound **7b** ( $\text{CDCl}_3$ )

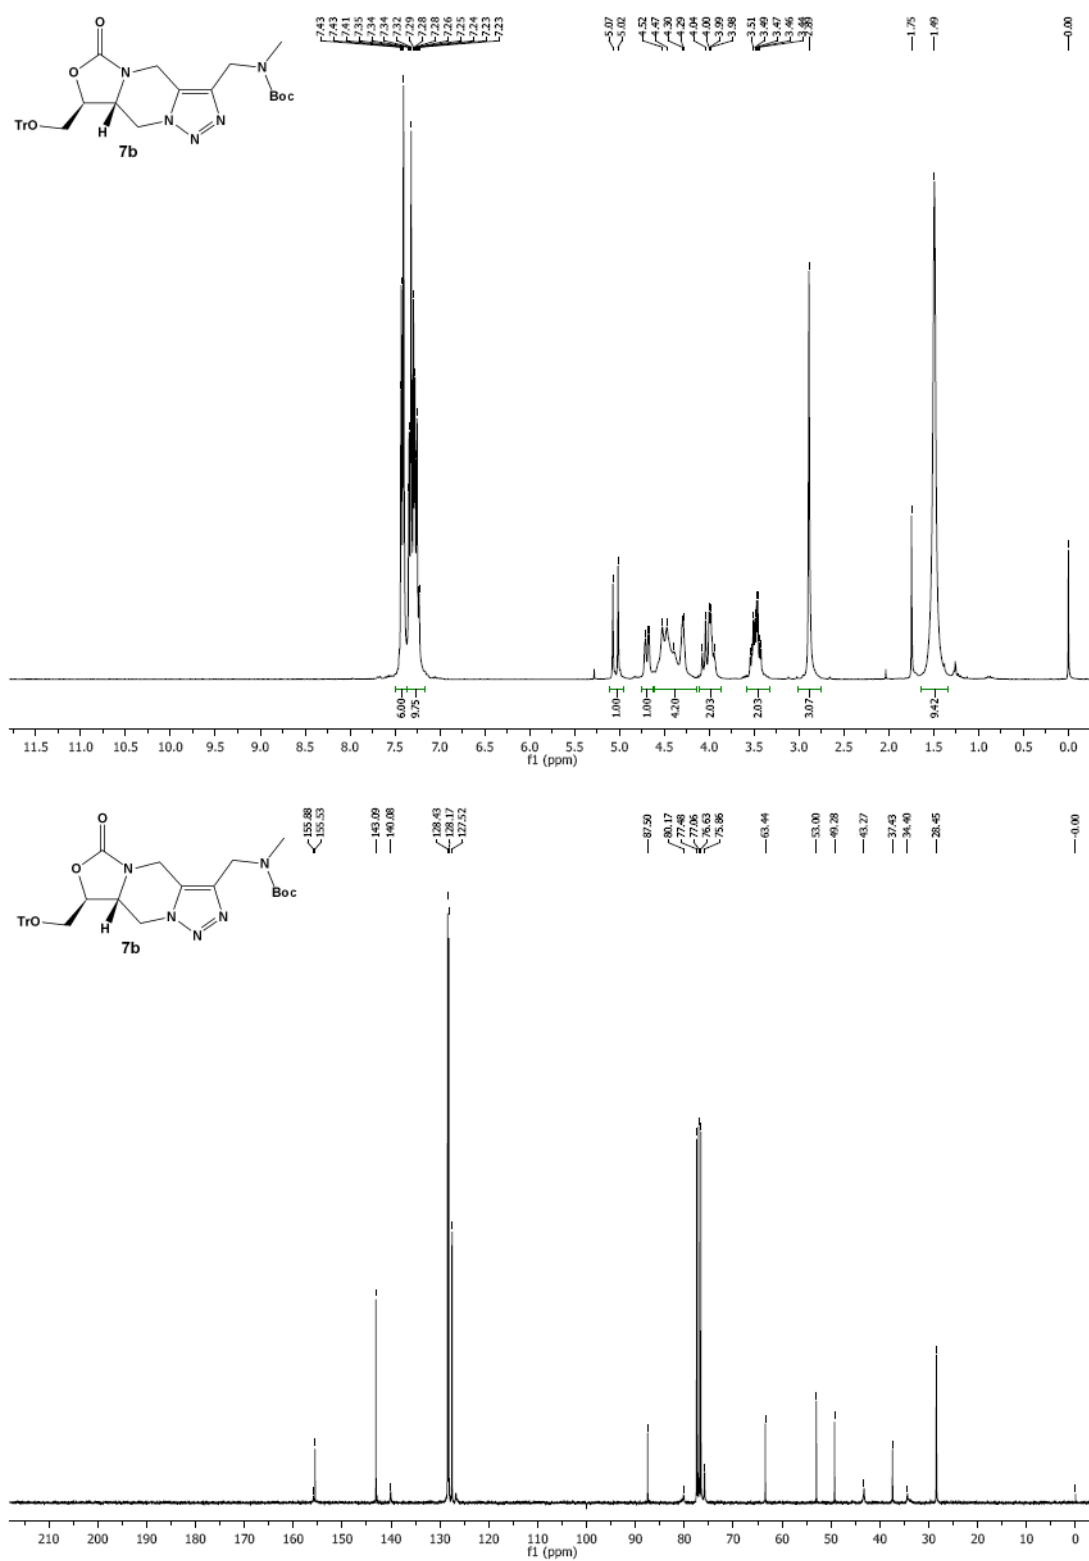



Figure 23.  $^1\text{H}$  and  $^{13}\text{C}$  NMR spectra for compound **7c** ( $\text{CDCl}_3$ )

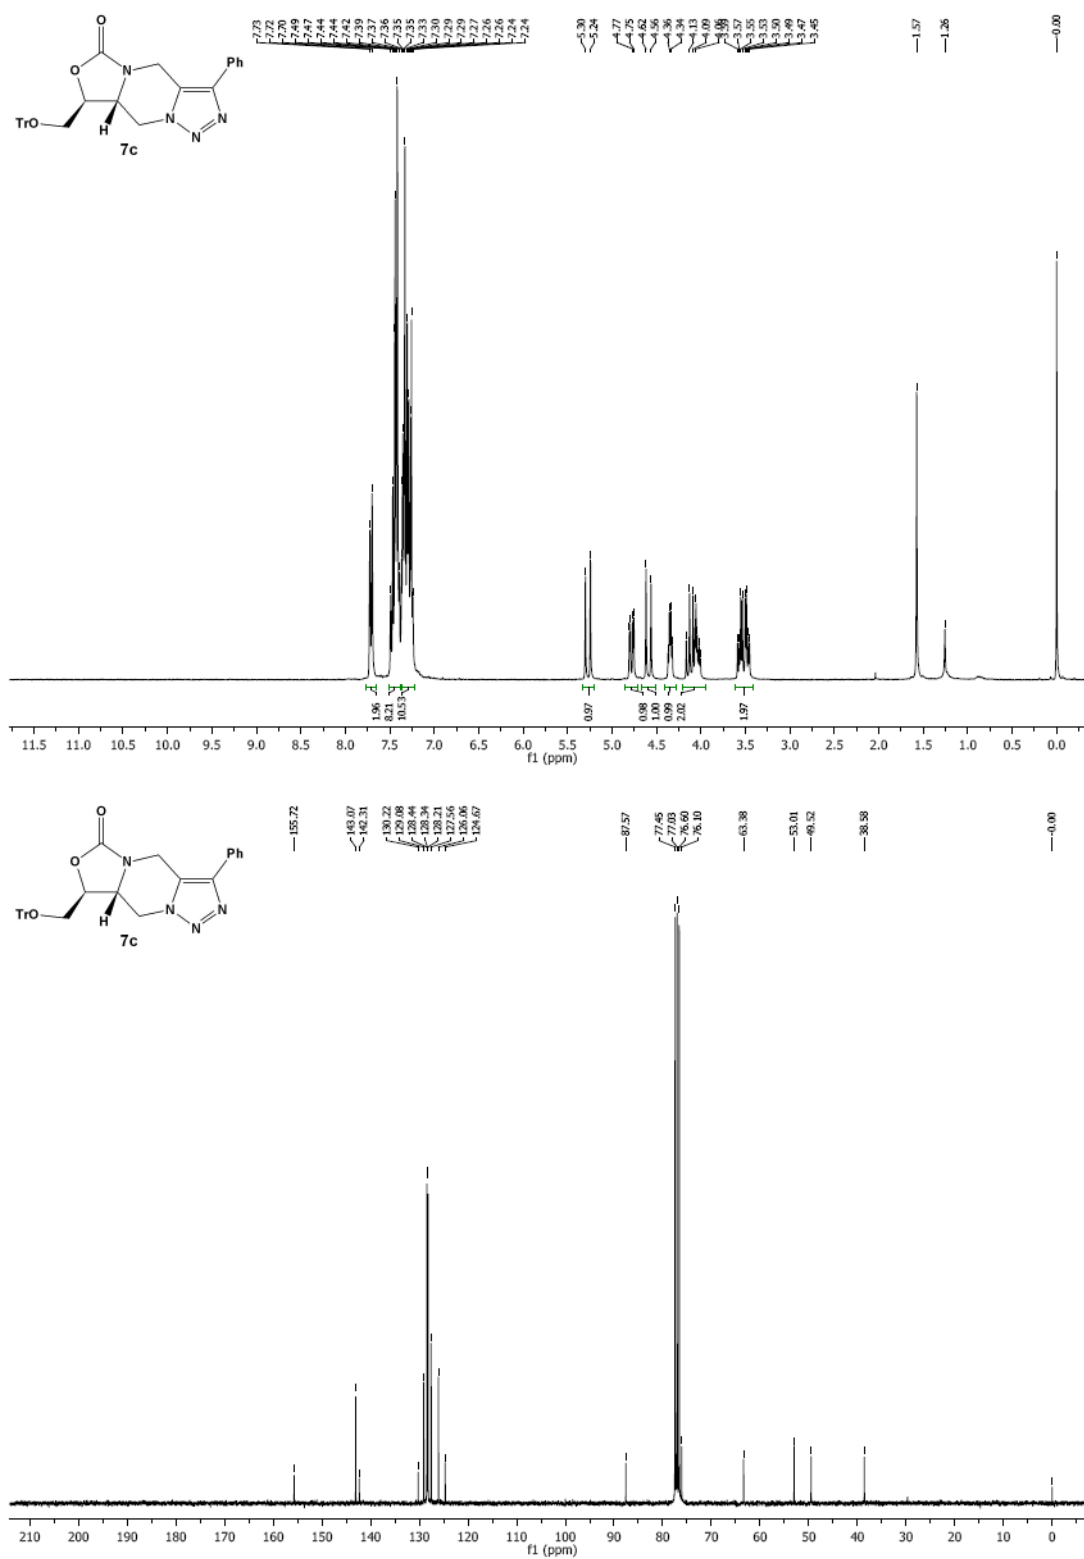

Figure 24.  $^1\text{H}$  and  $^{13}\text{C}$  NMR spectra for compound **7d** ( $\text{CDCl}_3$ )

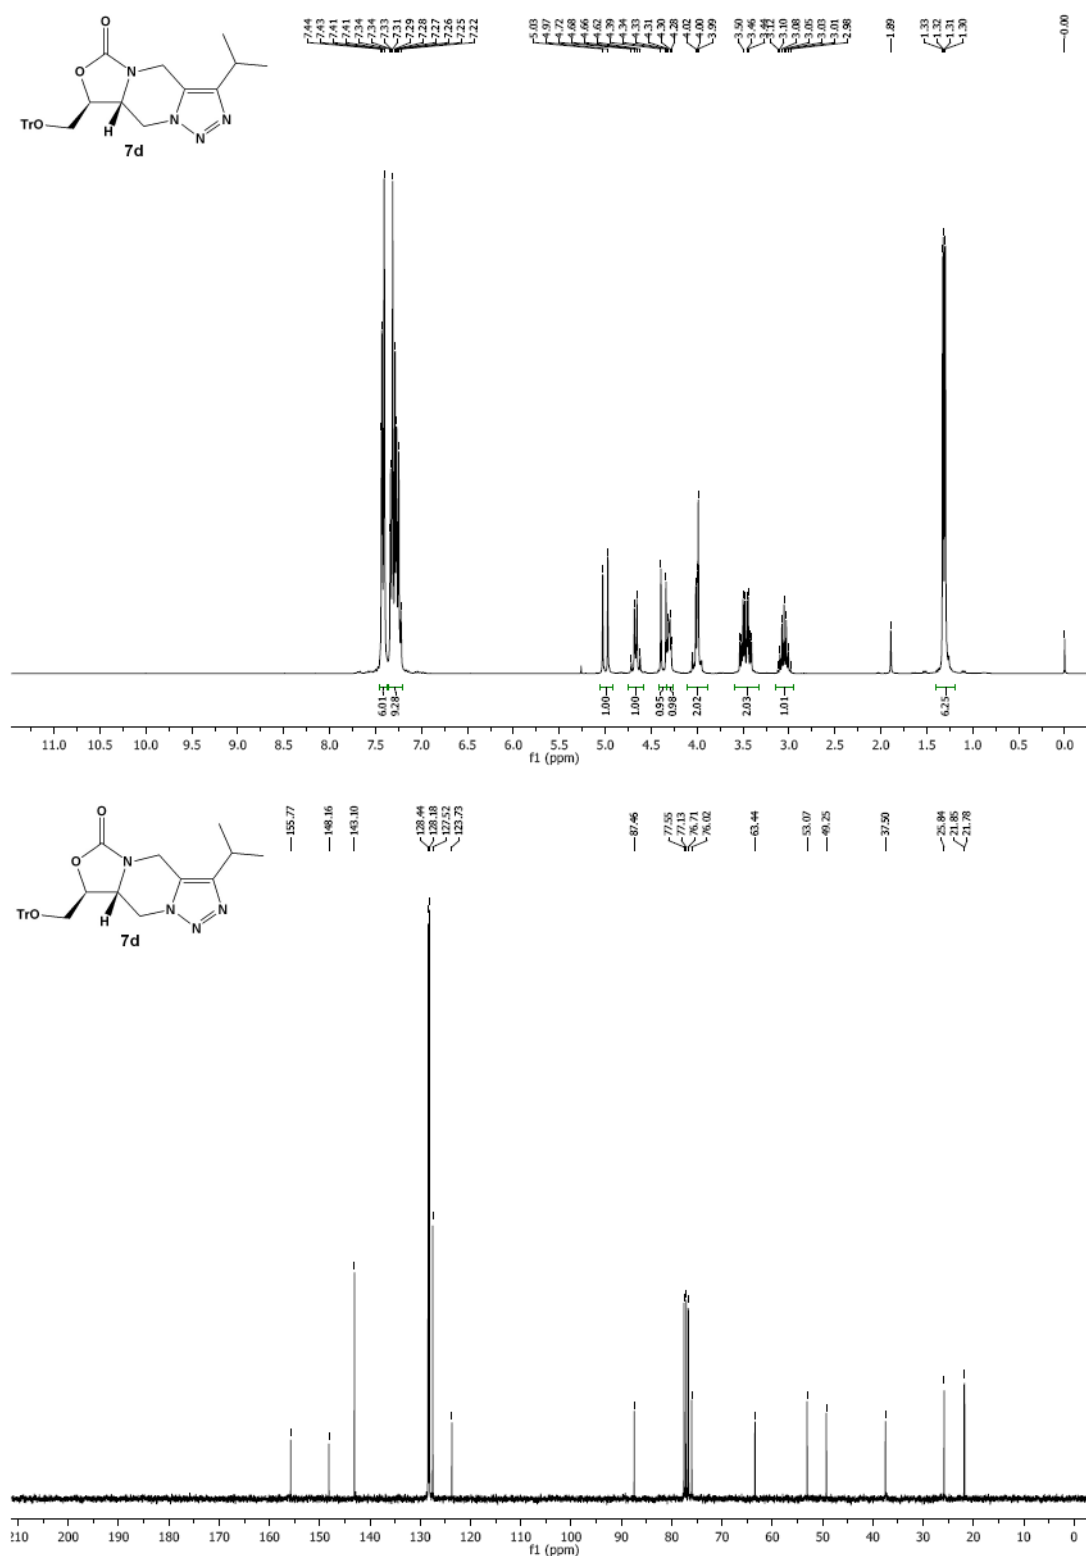

Figure 25.  $^1\text{H}$  and  $^{13}\text{C}$  NMR spectra for compound **7e** ( $\text{CDCl}_3$ )

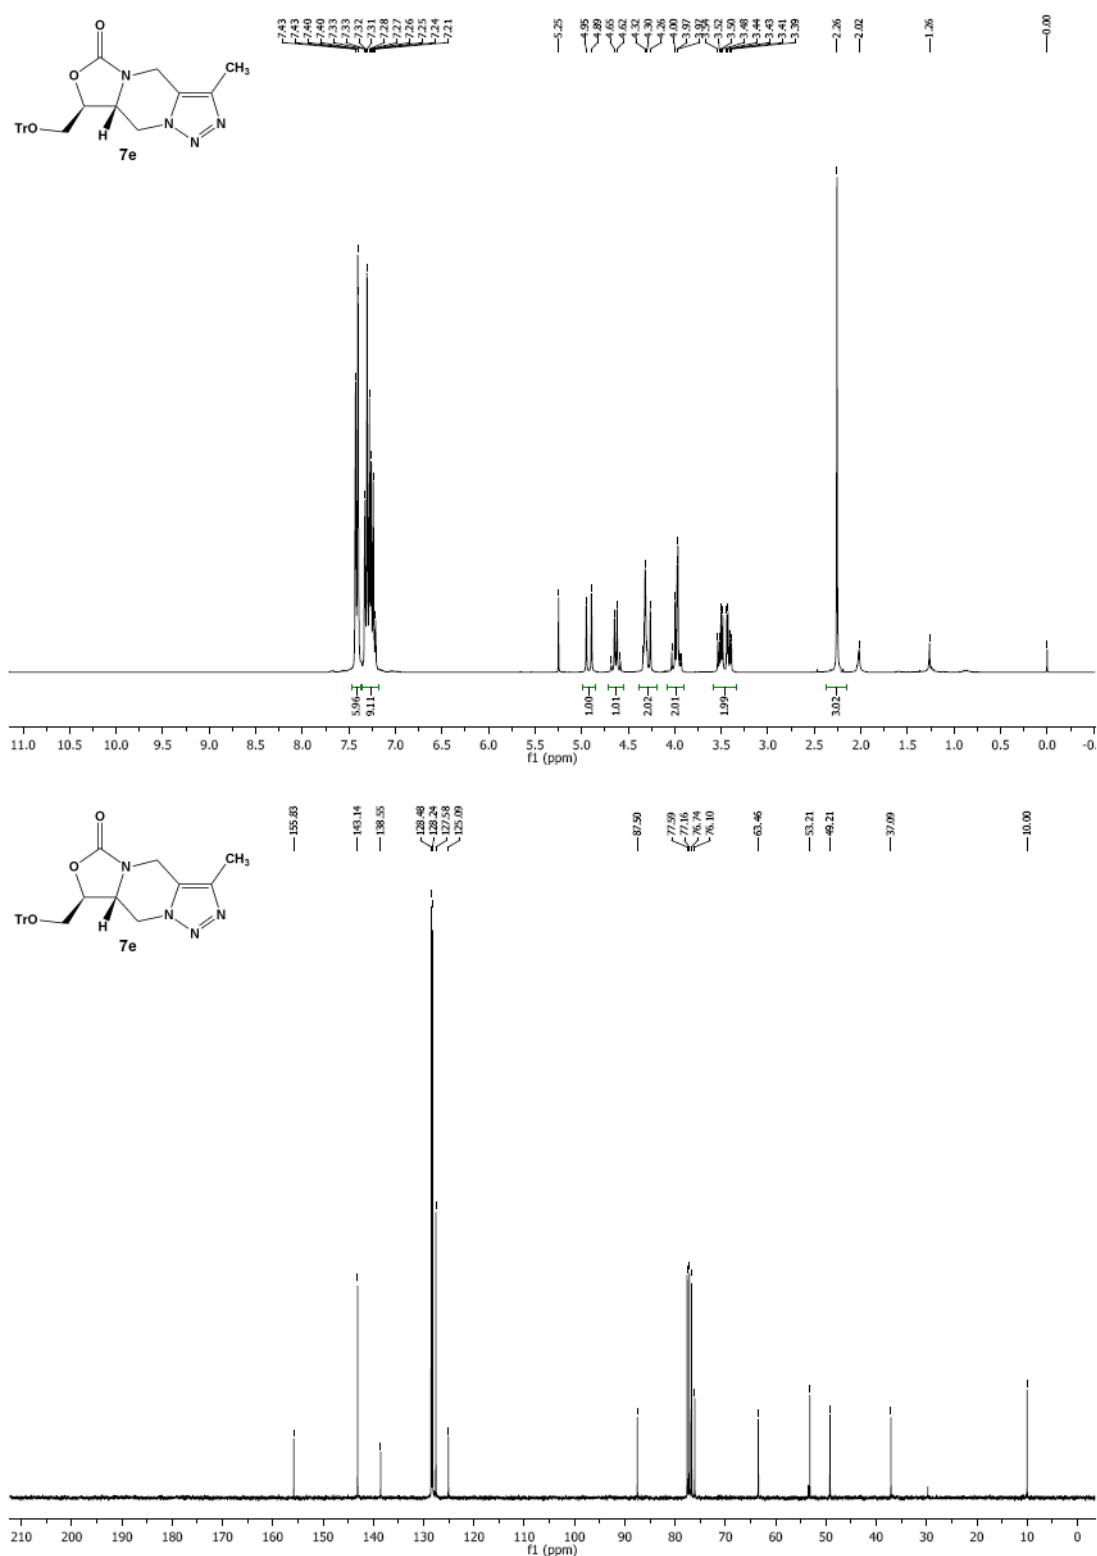

Figure 26.  $^1\text{H}$  and  $^{13}\text{C}$  NMR spectra for compound **7f** ( $\text{CDCl}_3$ )

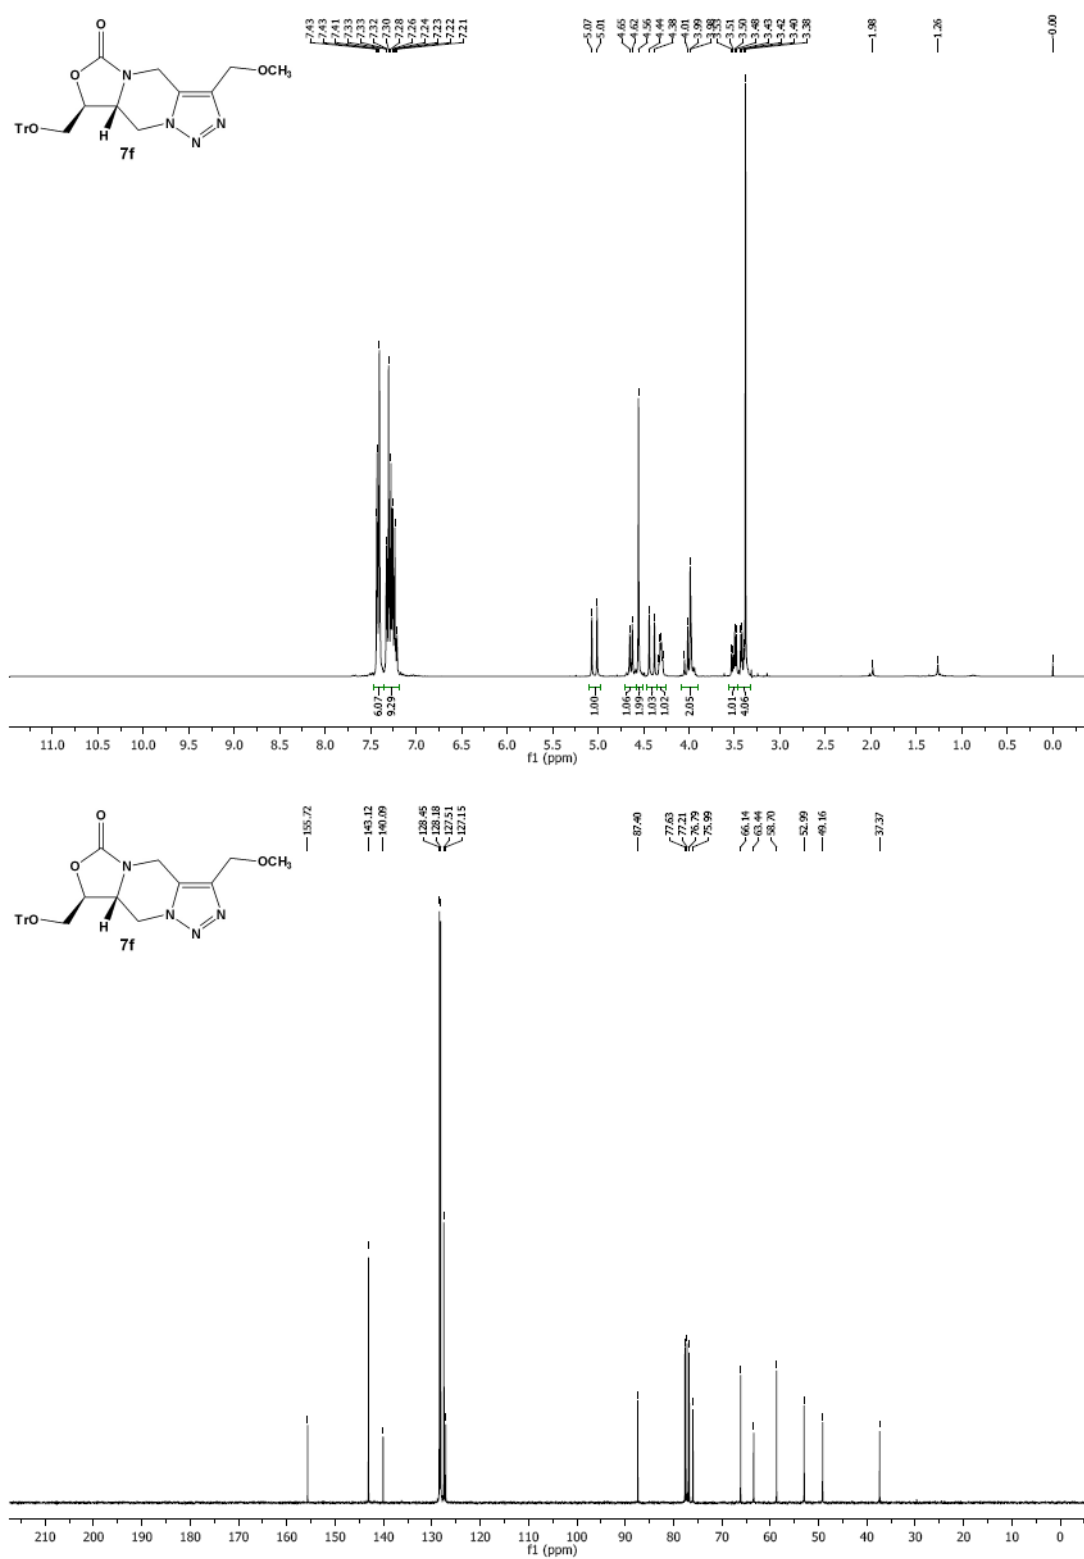

Figure 27.  $^1\text{H}$  and  $^{13}\text{C}$  NMR spectra for compound **7g** ( $\text{CDCl}_3$ )

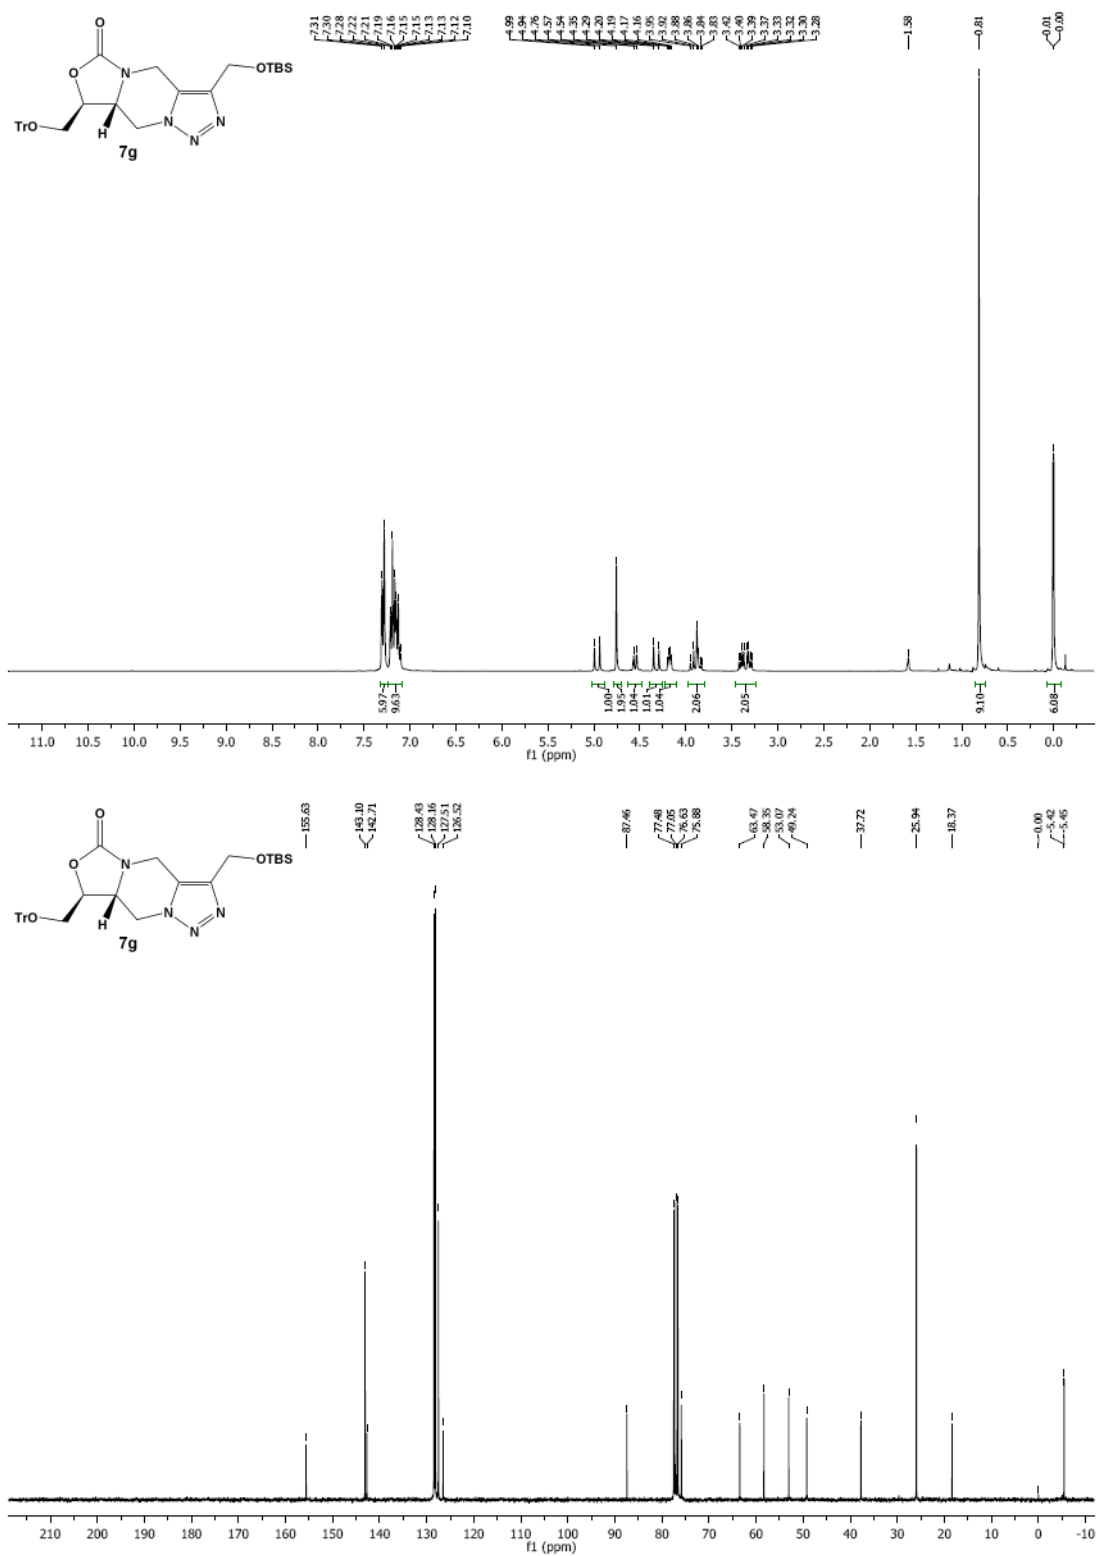

Figure 28.  $^1\text{H}$  and  $^{13}\text{C}$  NMR spectra for compound **7i** ( $\text{CDCl}_3$ )

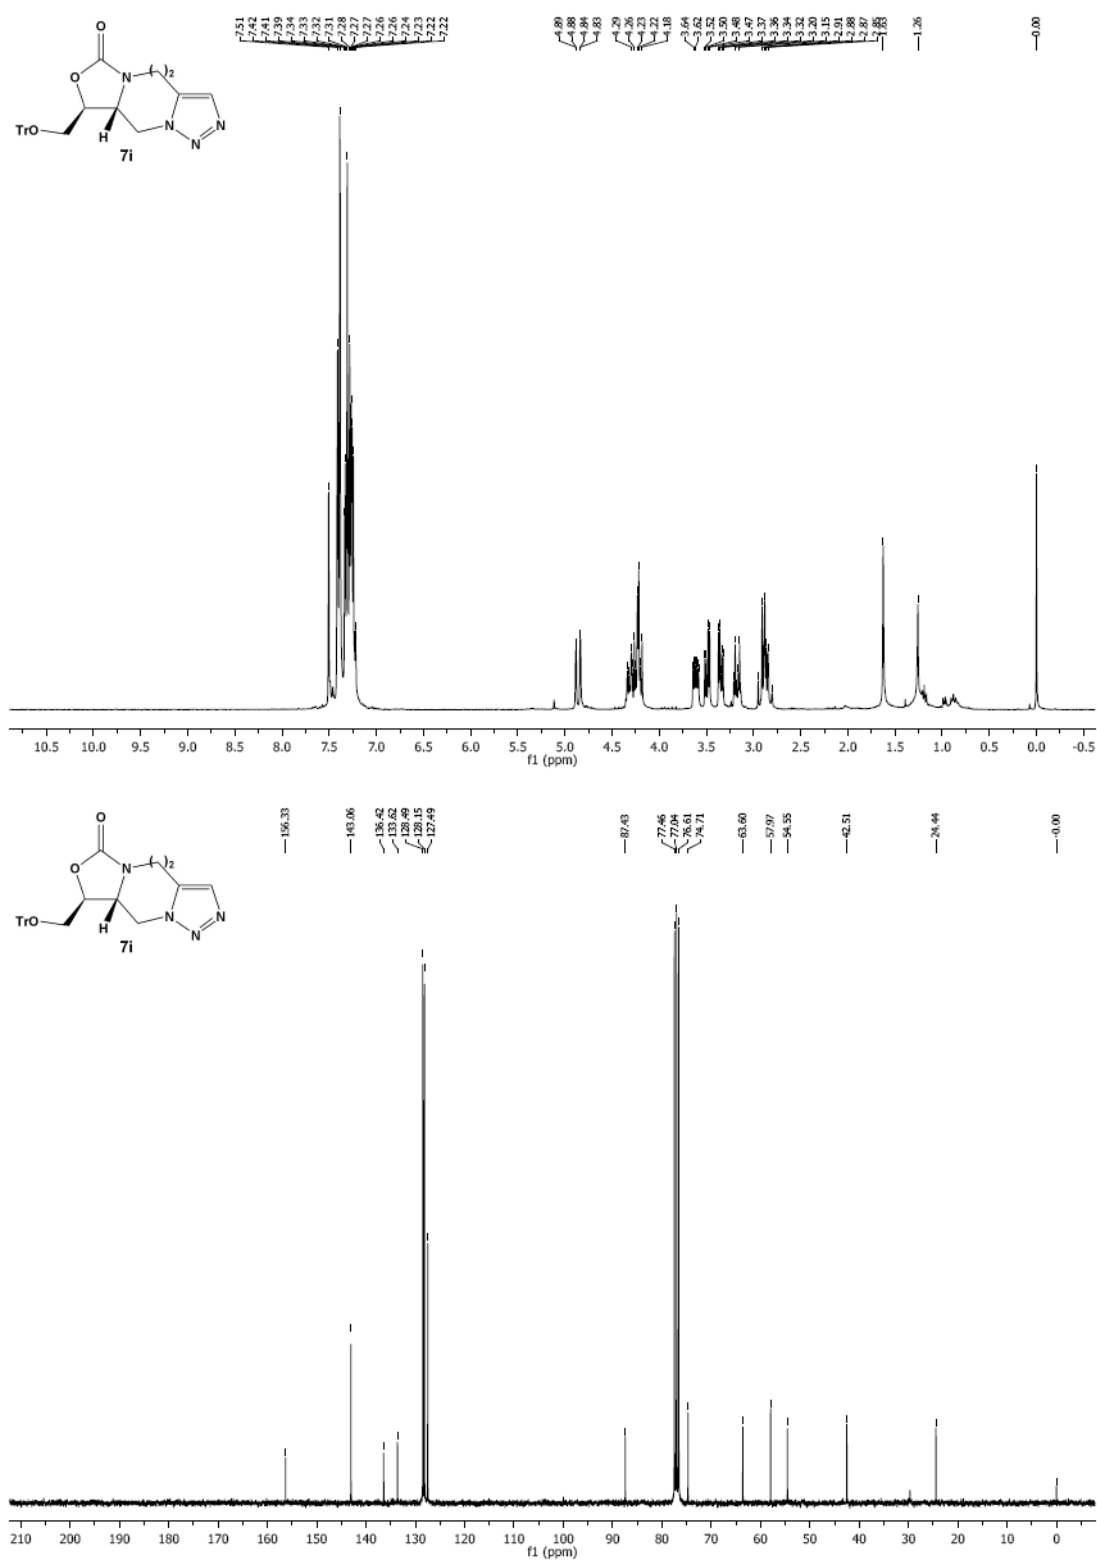

Figure 29.  $^1\text{H}$  and  $^{13}\text{C}$  NMR spectra for compound **7j** ( $\text{CDCl}_3$ )

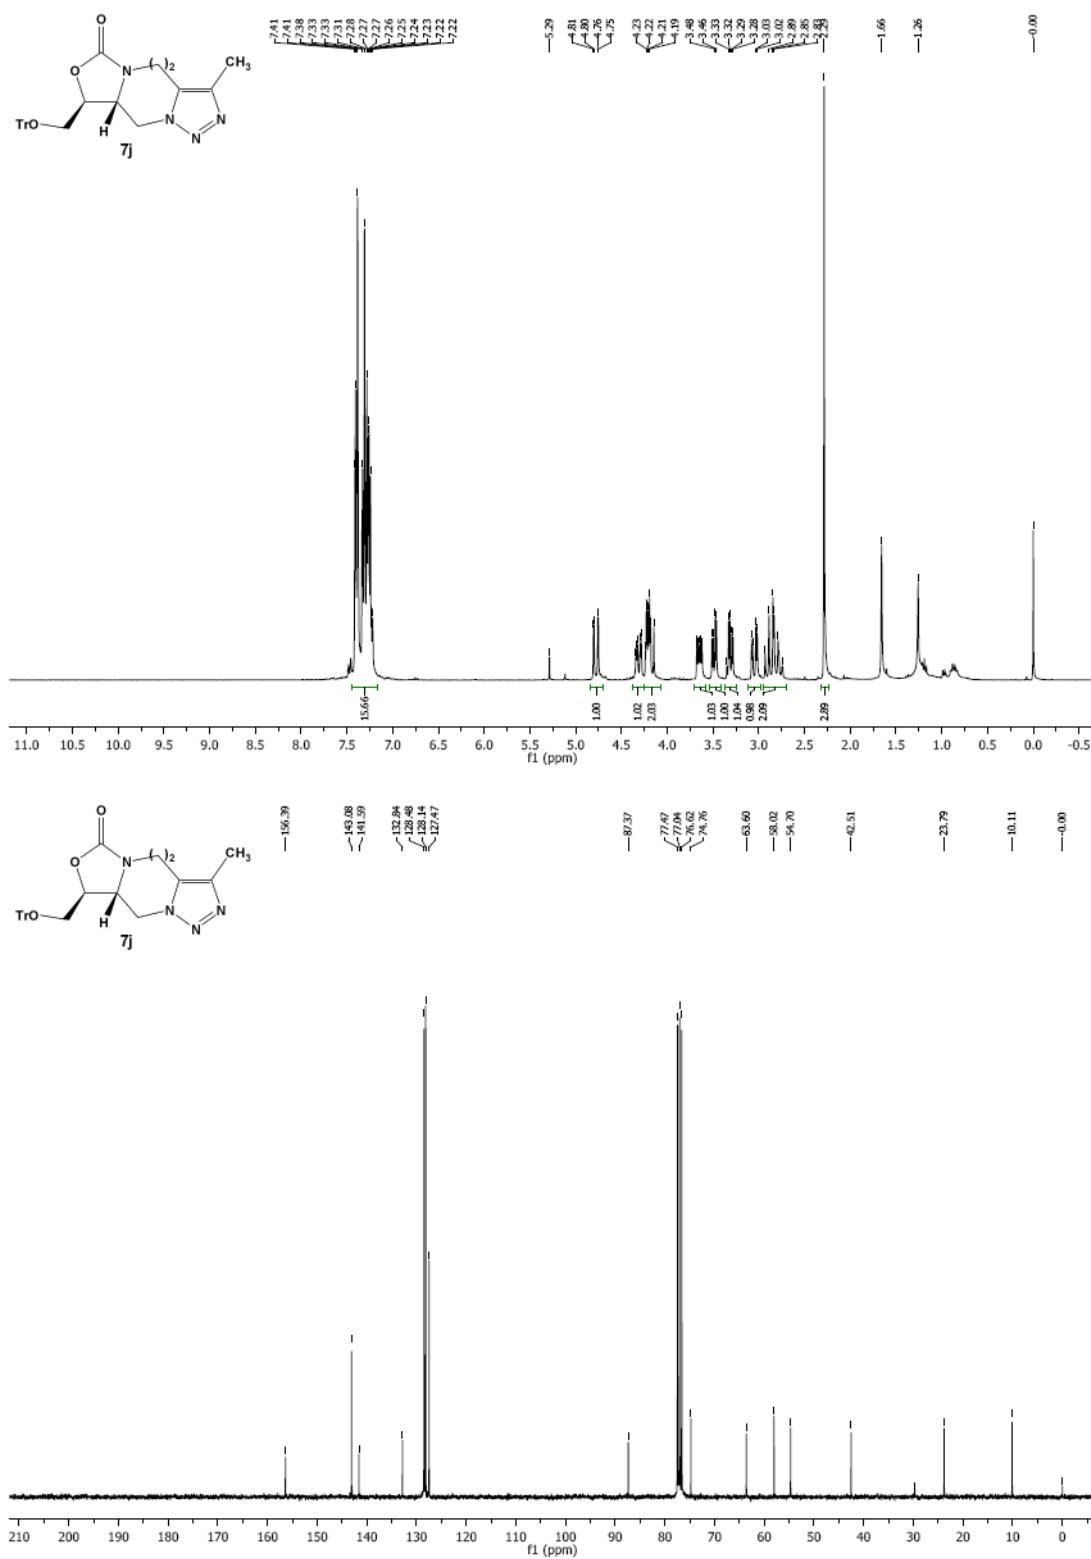

Figure 30.  $^1\text{H}$  and  $^{13}\text{C}$  NMR spectra for compound **7k** ( $\text{CDCl}_3$ )

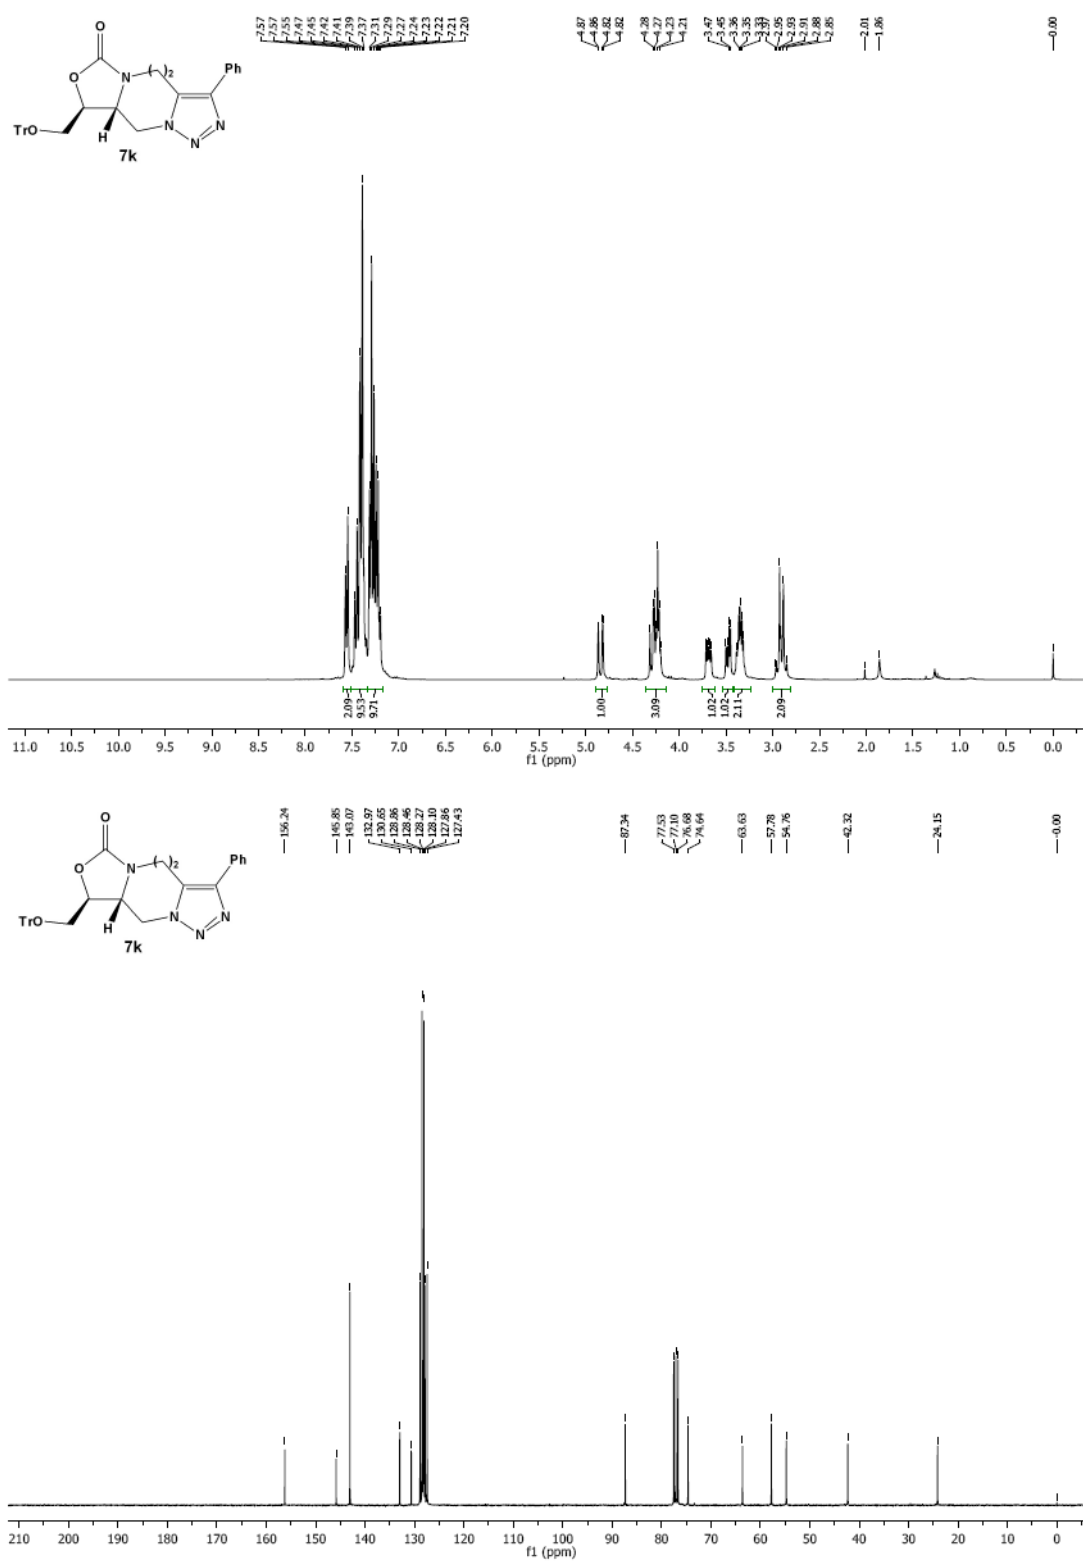



Figure 31.  $^1\text{H}$  and  $^{13}\text{C}$  NMR spectra for compound **71** ( $\text{CDCl}_3$ )

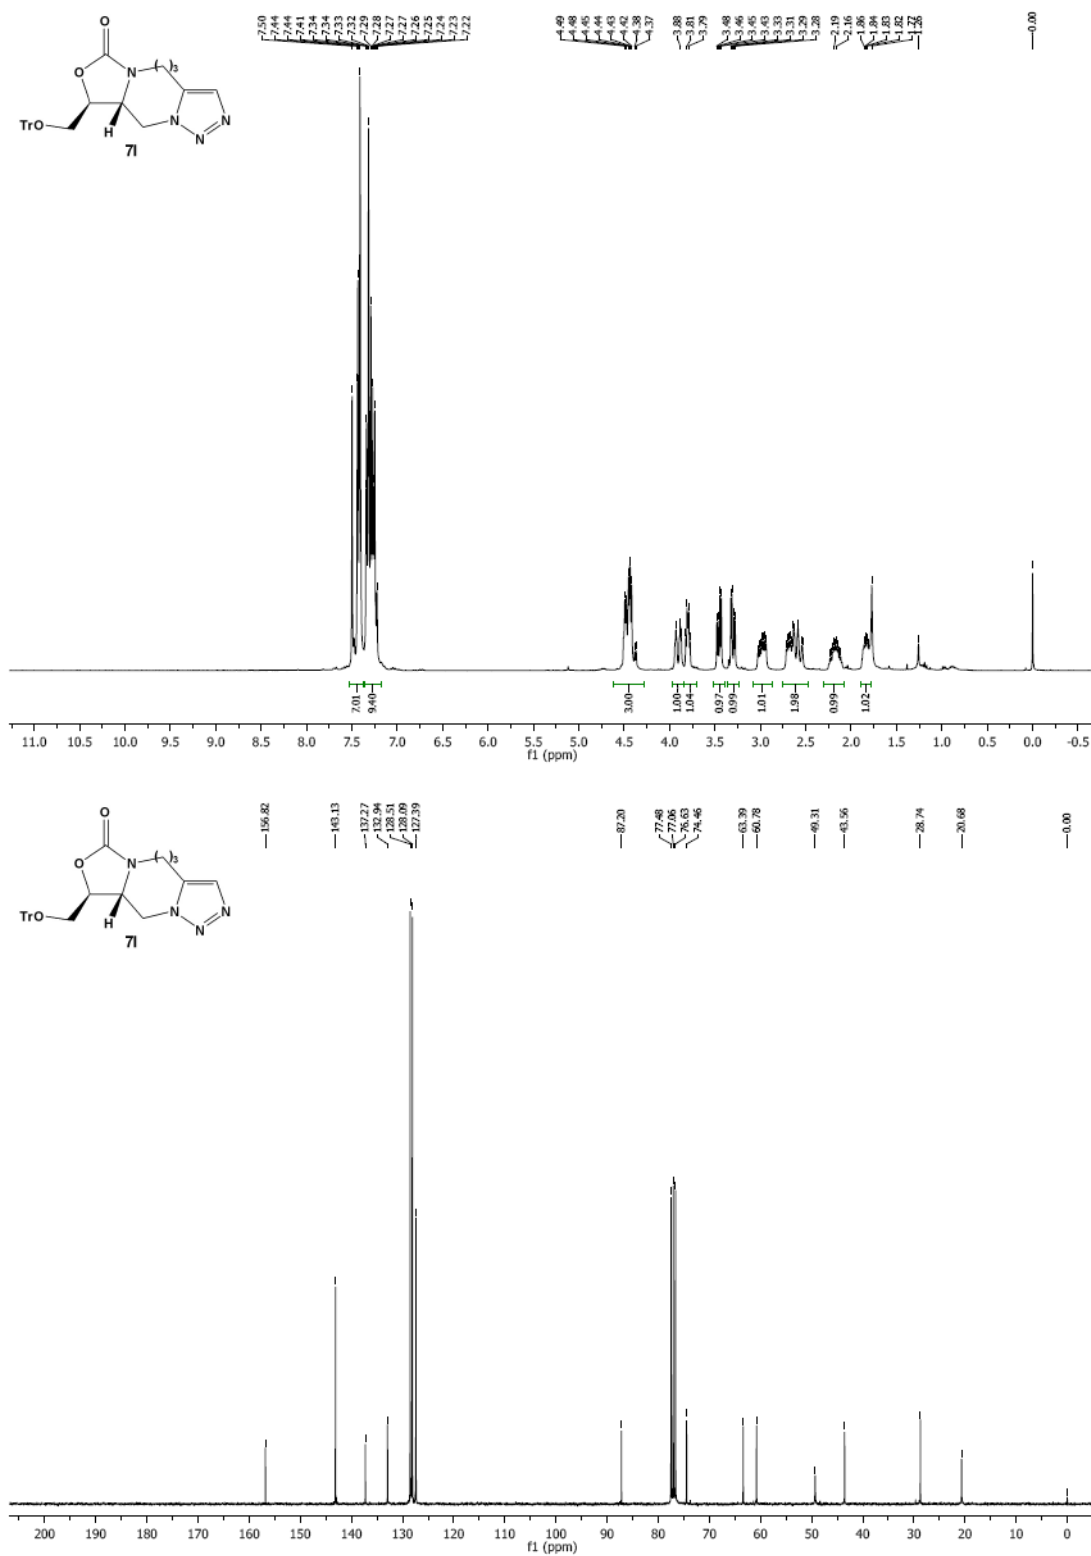

Figure 32.  $^1\text{H}$  and  $^{13}\text{C}$  NMR spectra for compound **7m** ( $\text{CDCl}_3$ )

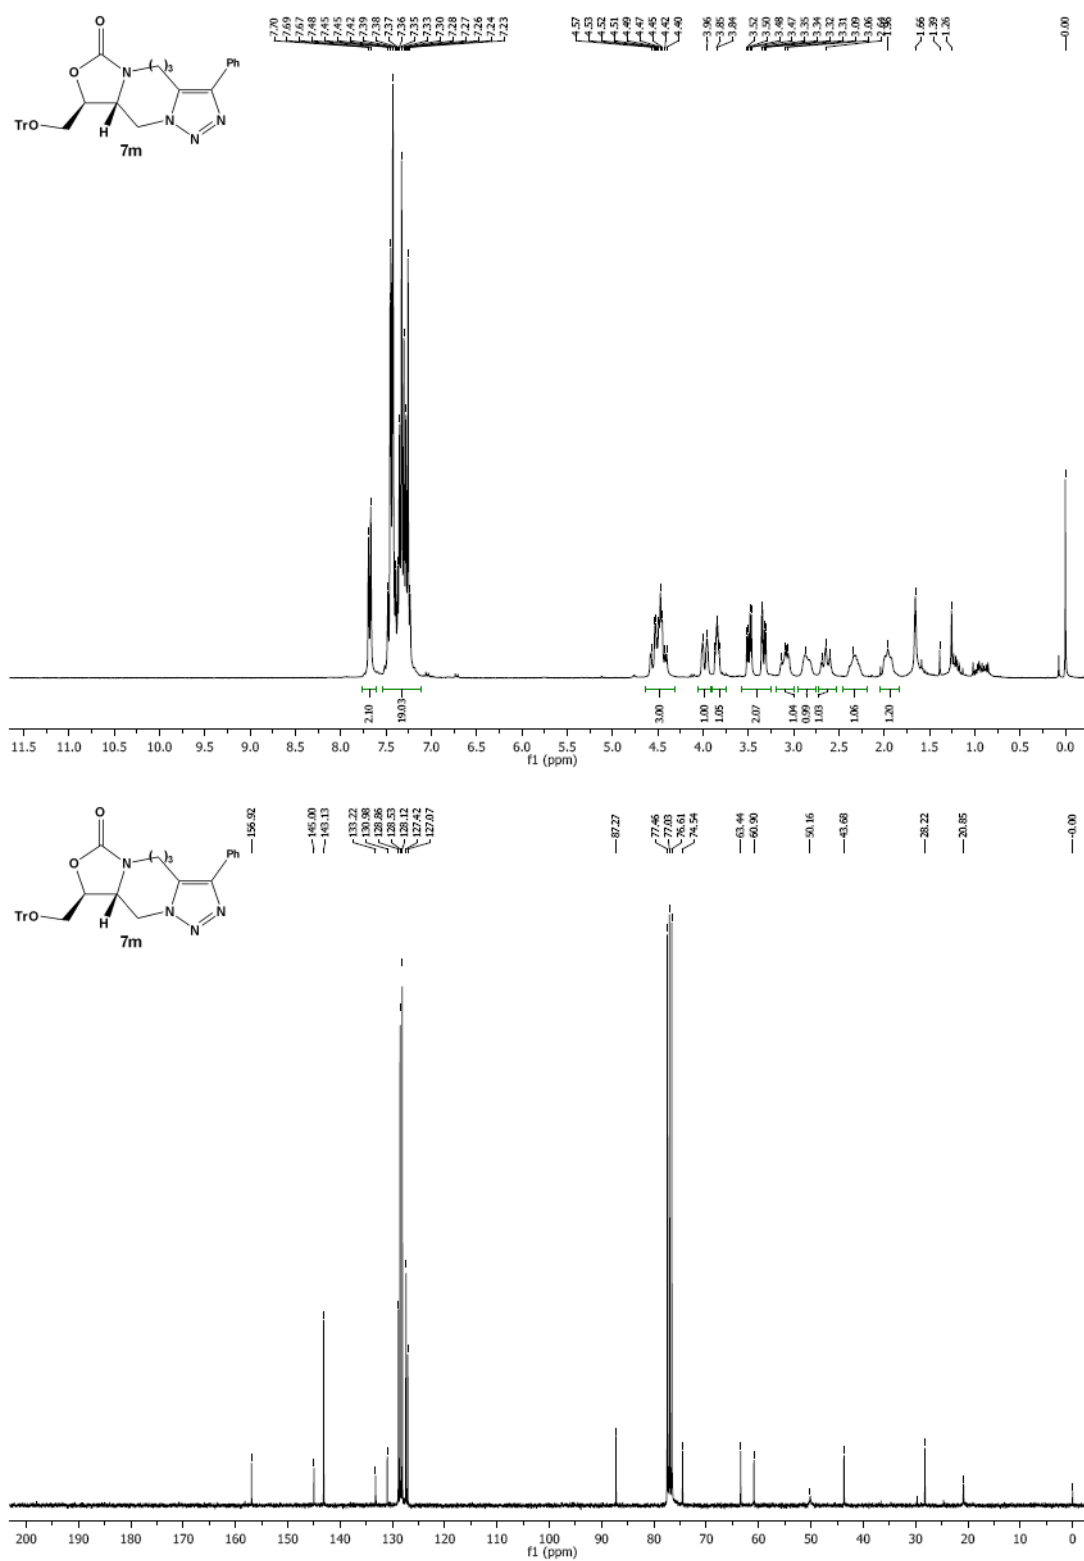

Figure 33.  $^1\text{H}$  and  $^{13}\text{C}$  NMR spectra for compound **7n** ( $\text{CDCl}_3$ )

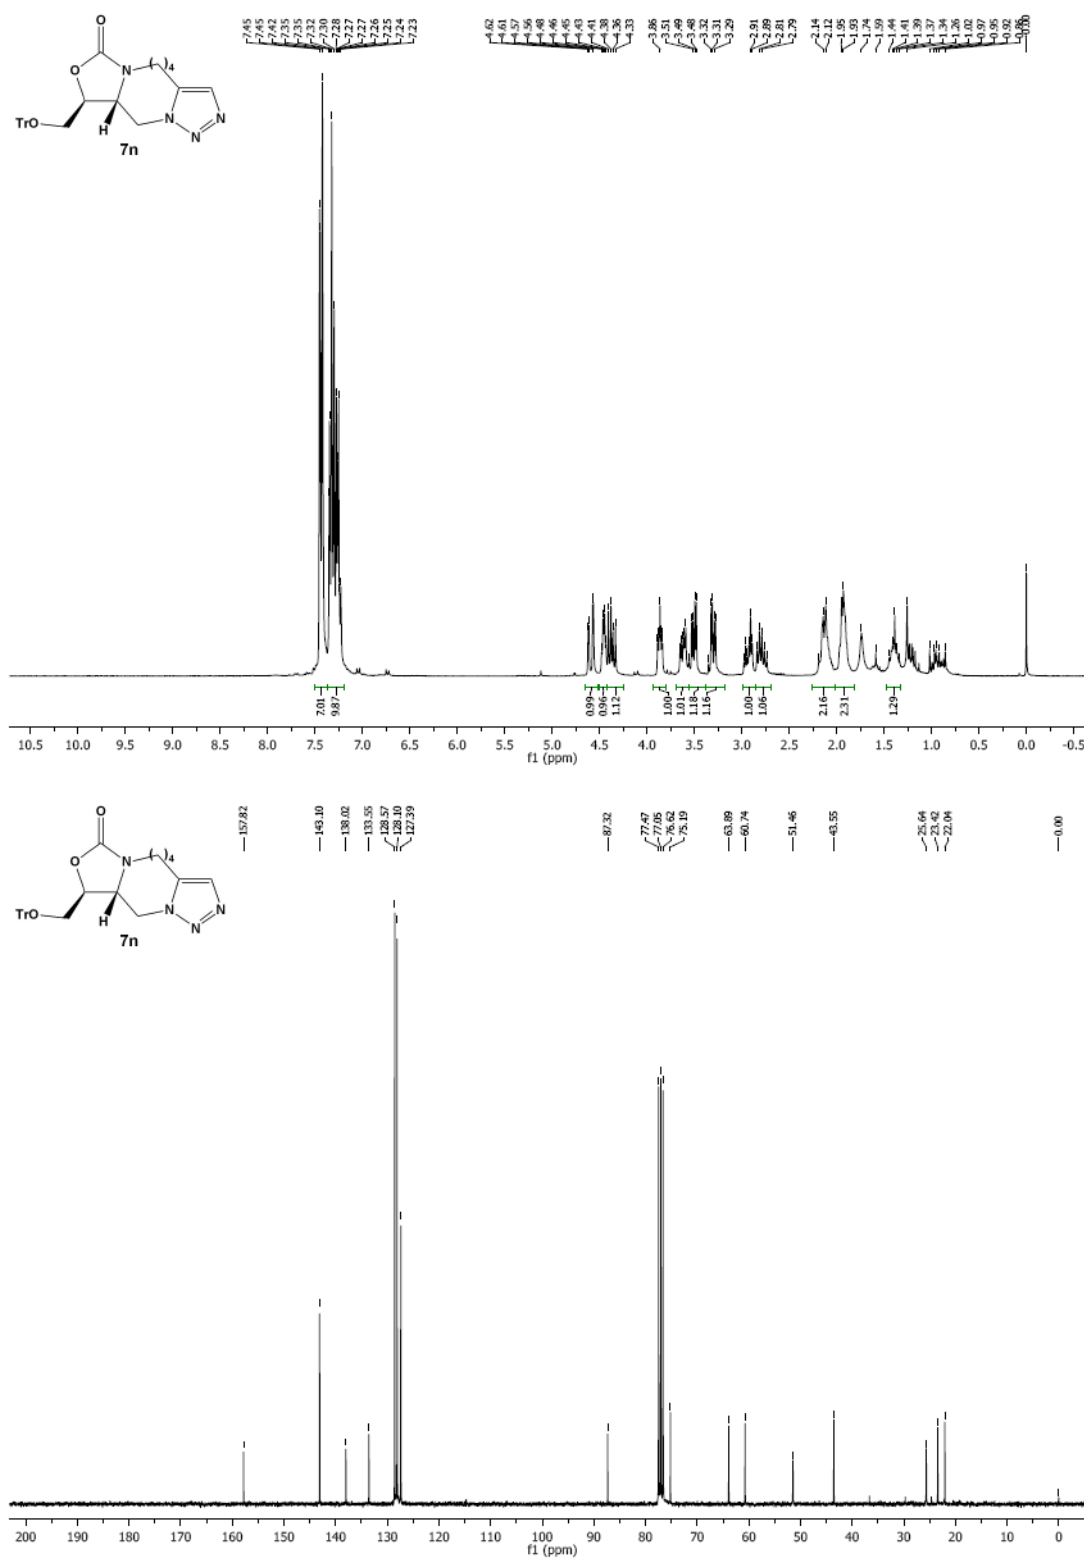

Figure 34.  $^1\text{H}$  and  $^{13}\text{C}$  NMR spectra for compound **7o** ( $\text{CDCl}_3$ )

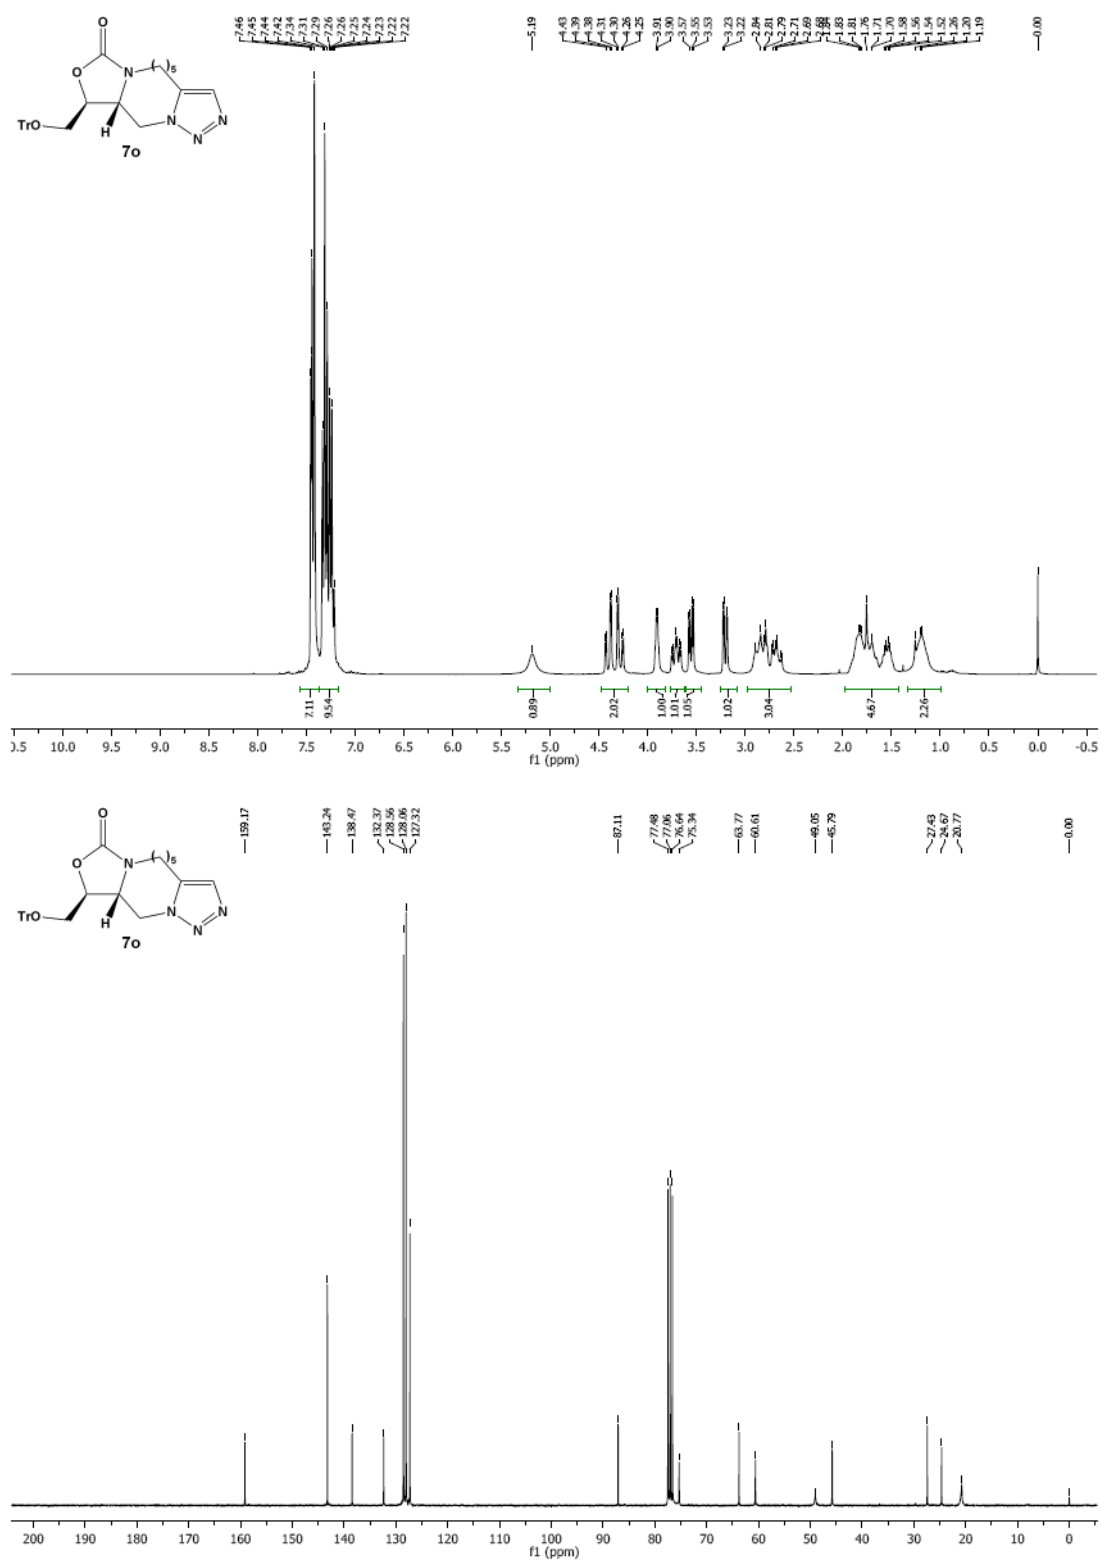

Figure 35.  $^1\text{H}$  and  $^{13}\text{C}$  NMR spectra for compound **7p** ( $\text{CDCl}_3$ )

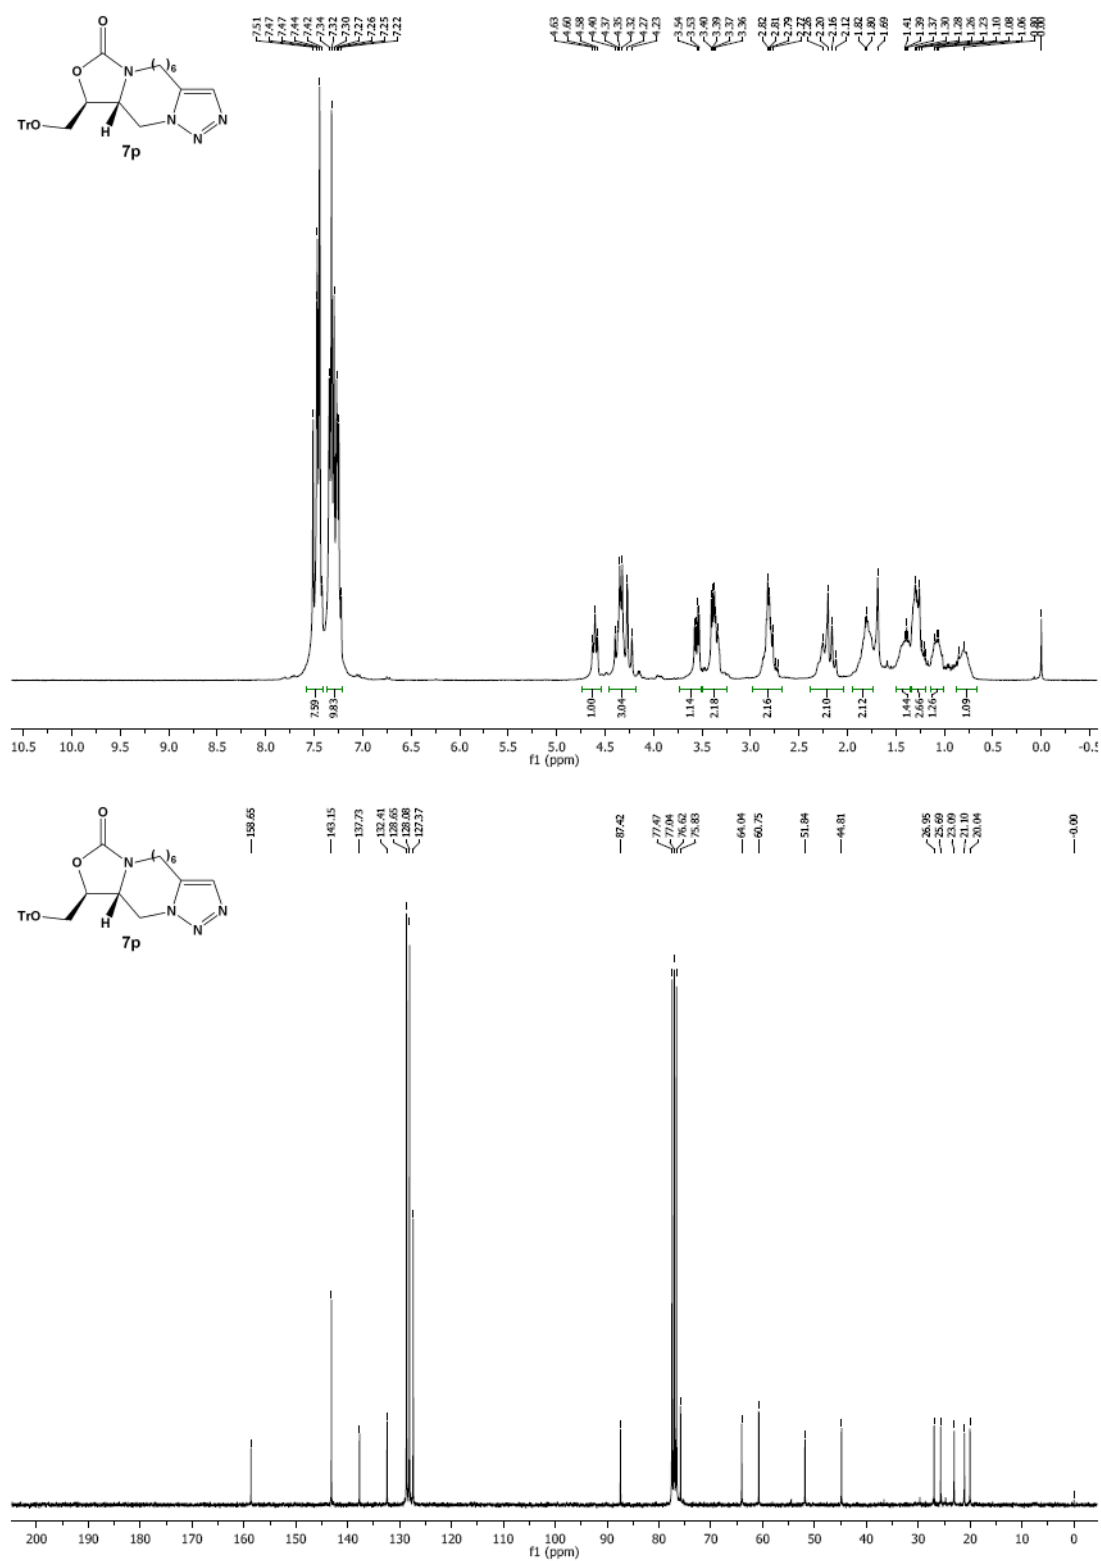

Figure 36.  $^1\text{H}$  and  $^{13}\text{C}$  NMR spectra for compound **7q** ( $\text{CDCl}_3$ )

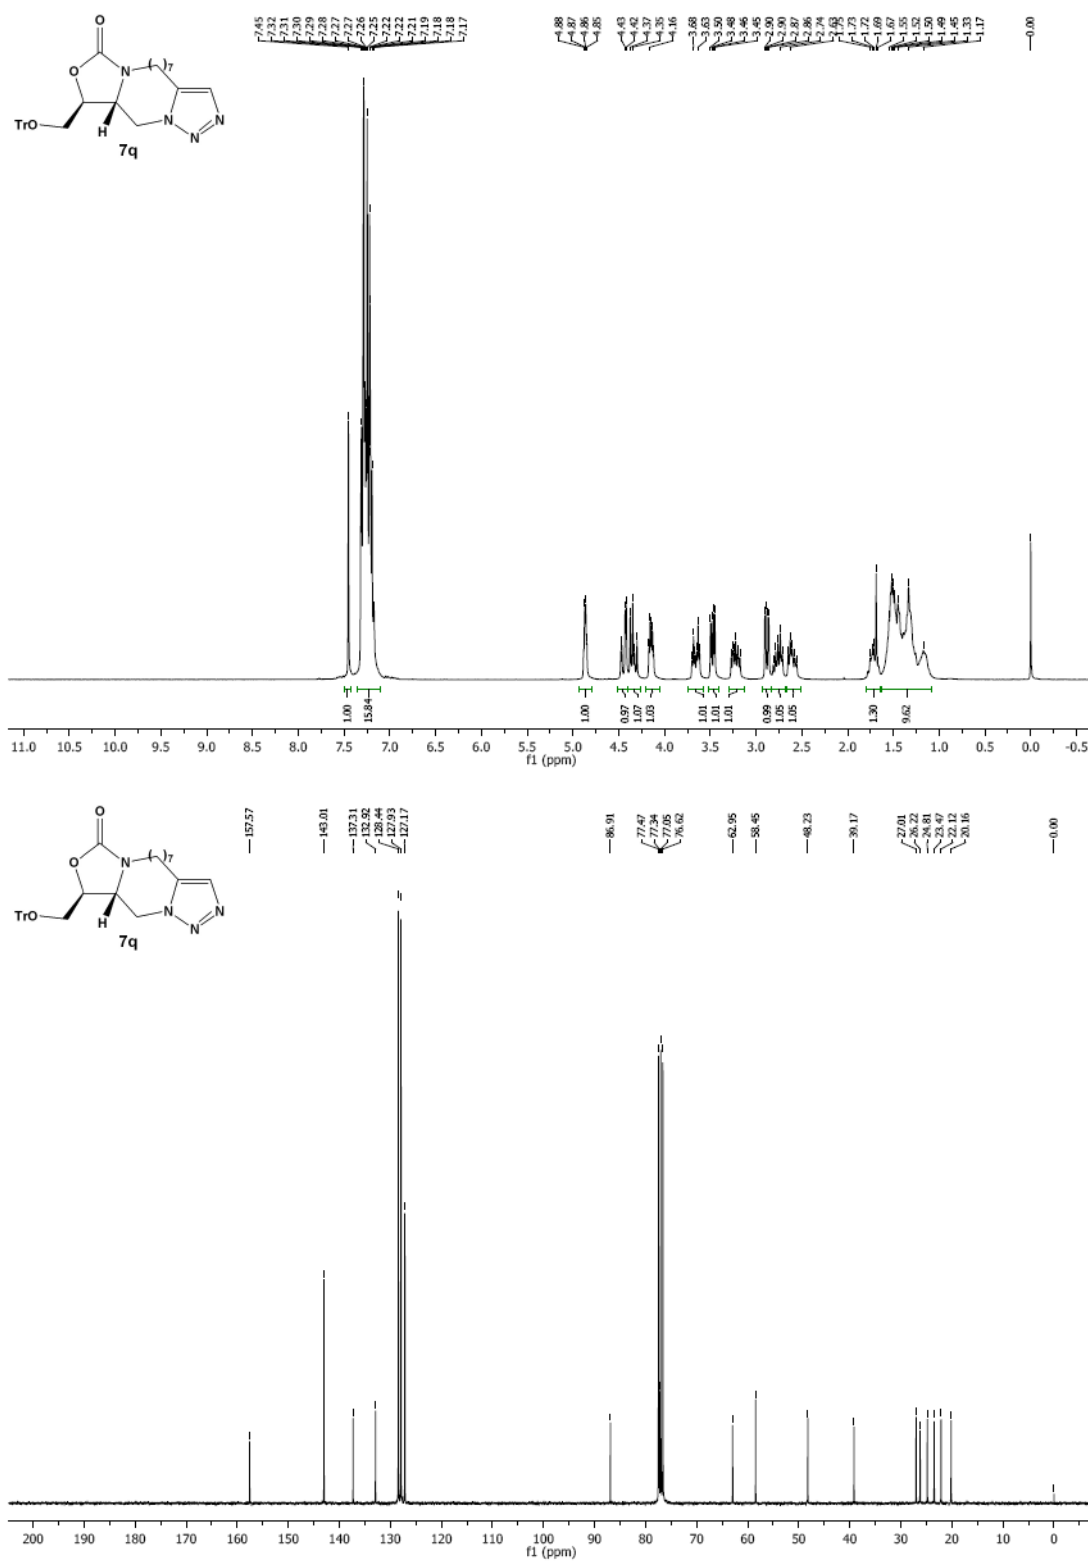

Figure 37.  $^1\text{H}$  and  $^{13}\text{C}$  NMR spectra for compound **14q** ( $\text{CDCl}_3$ )

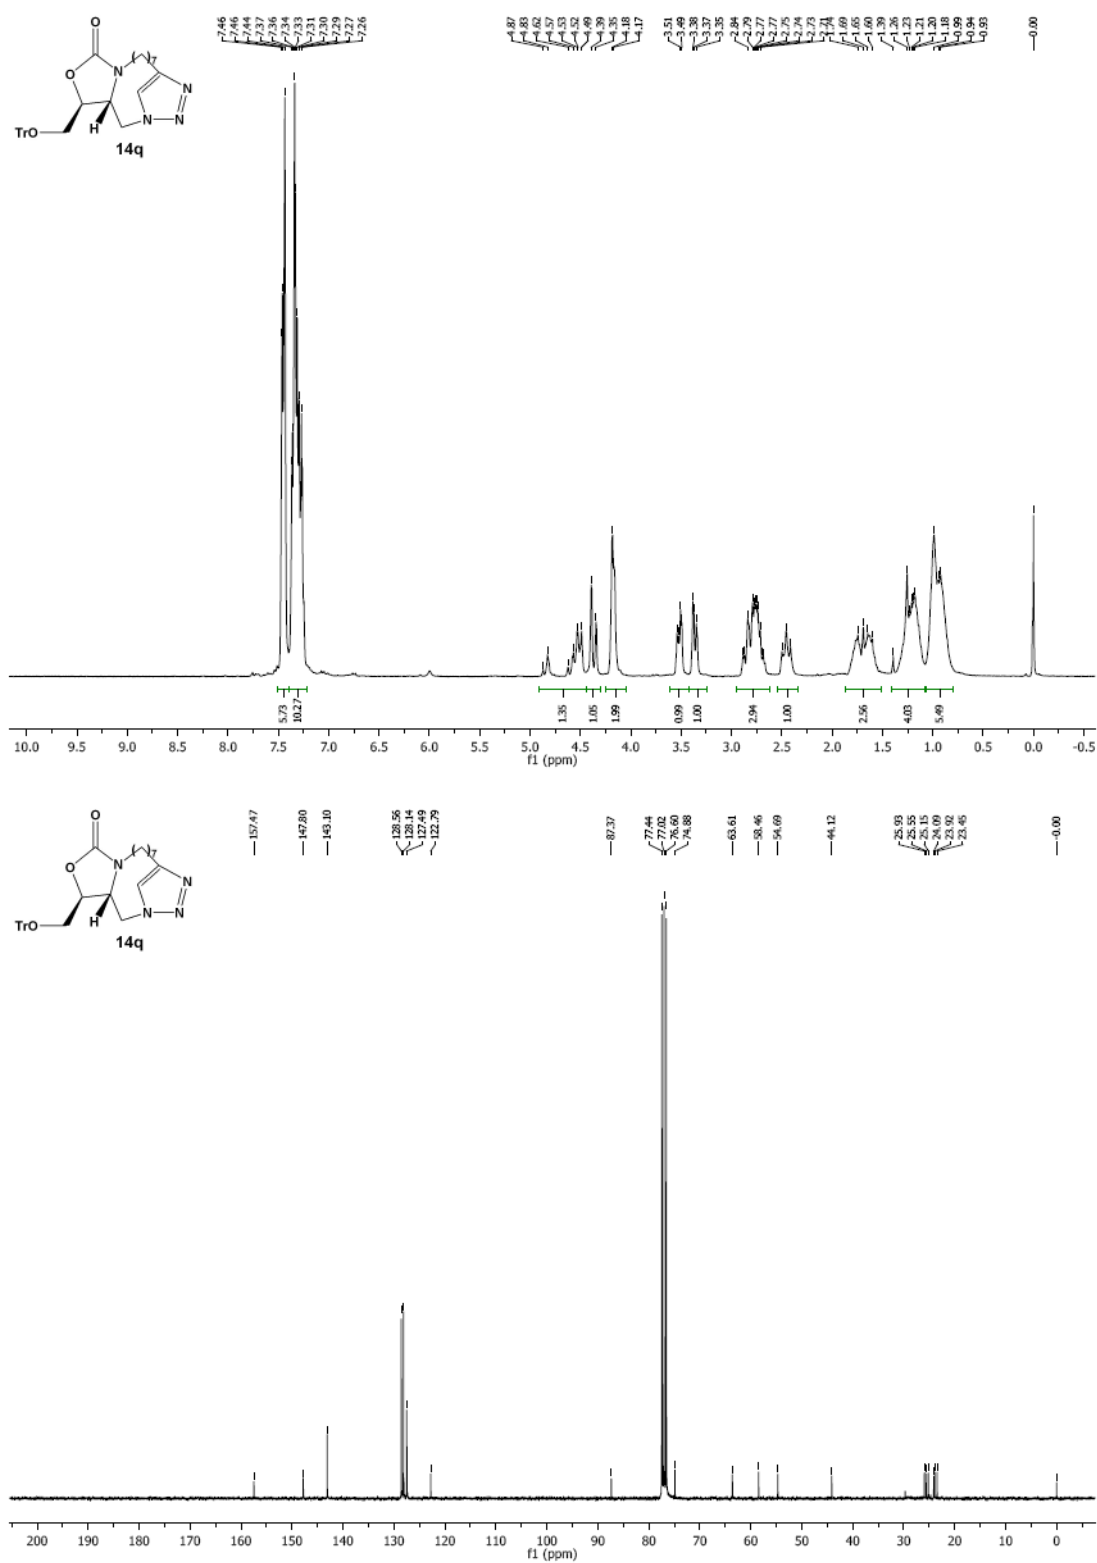

Figure 38.  $^1\text{H}$  and  $^{13}\text{C}$  NMR spectra for compound **15a** ( $\text{CDCl}_3$ )

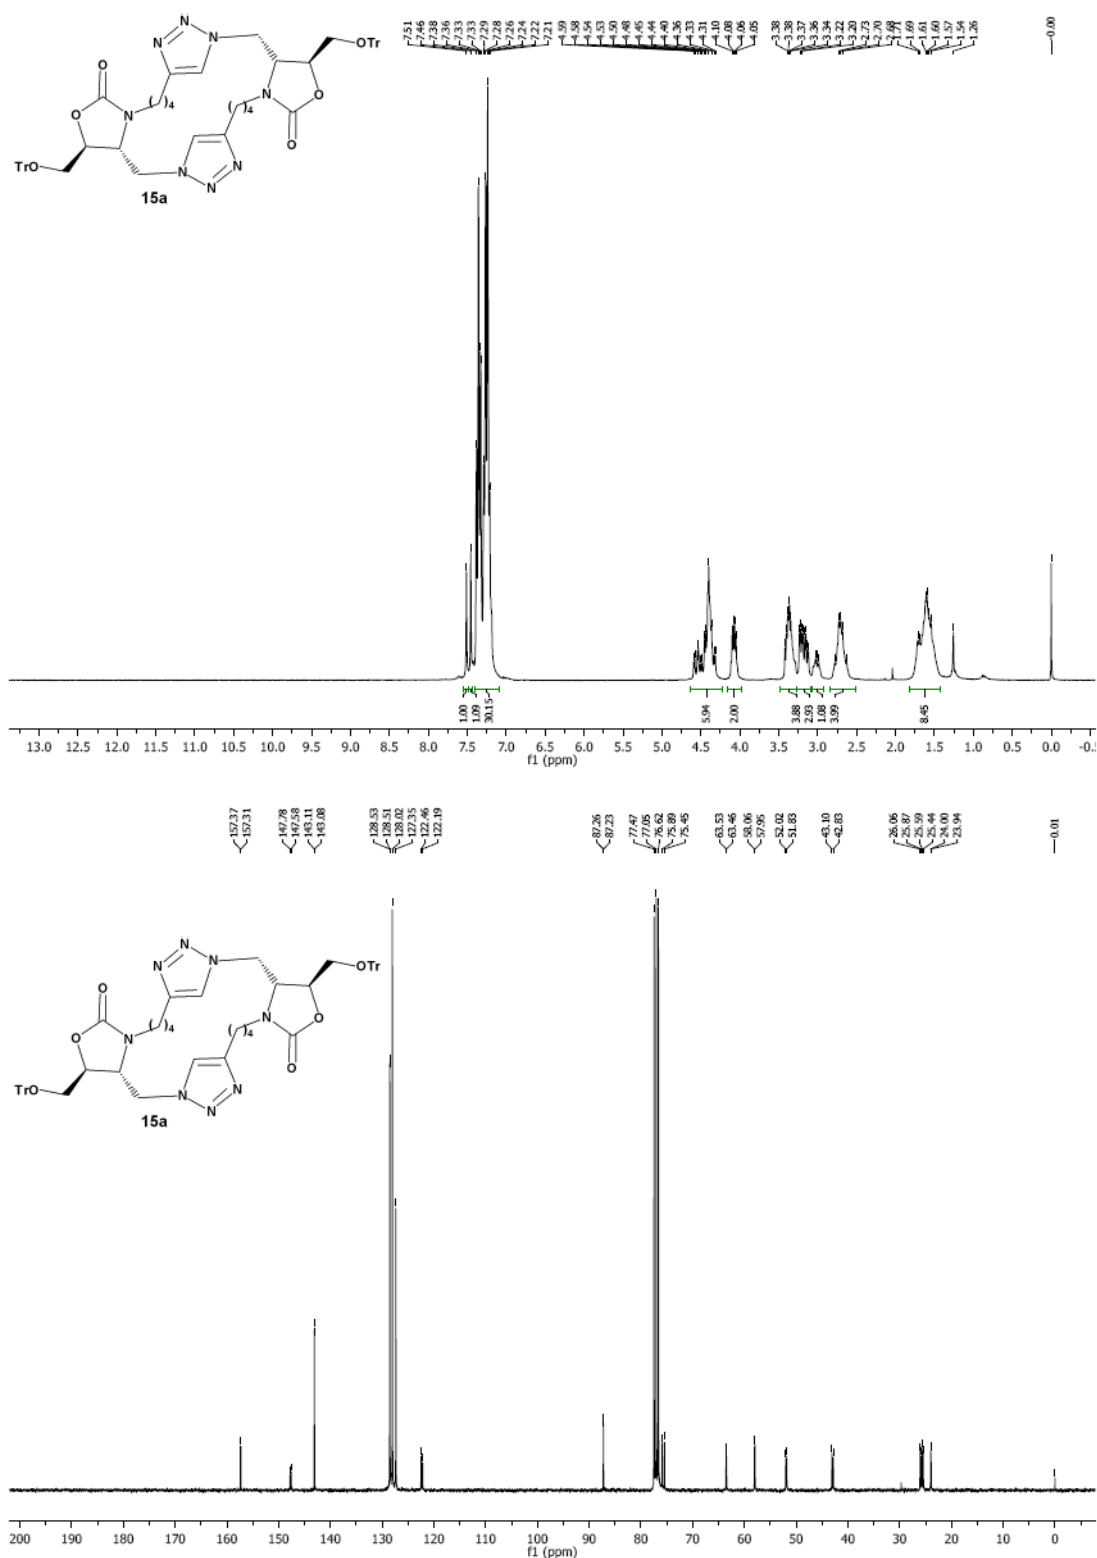



Figure 39.  $^1\text{H}$  and  $^{13}\text{C}$  NMR spectra for compound **15b** ( $\text{CDCl}_3$ )

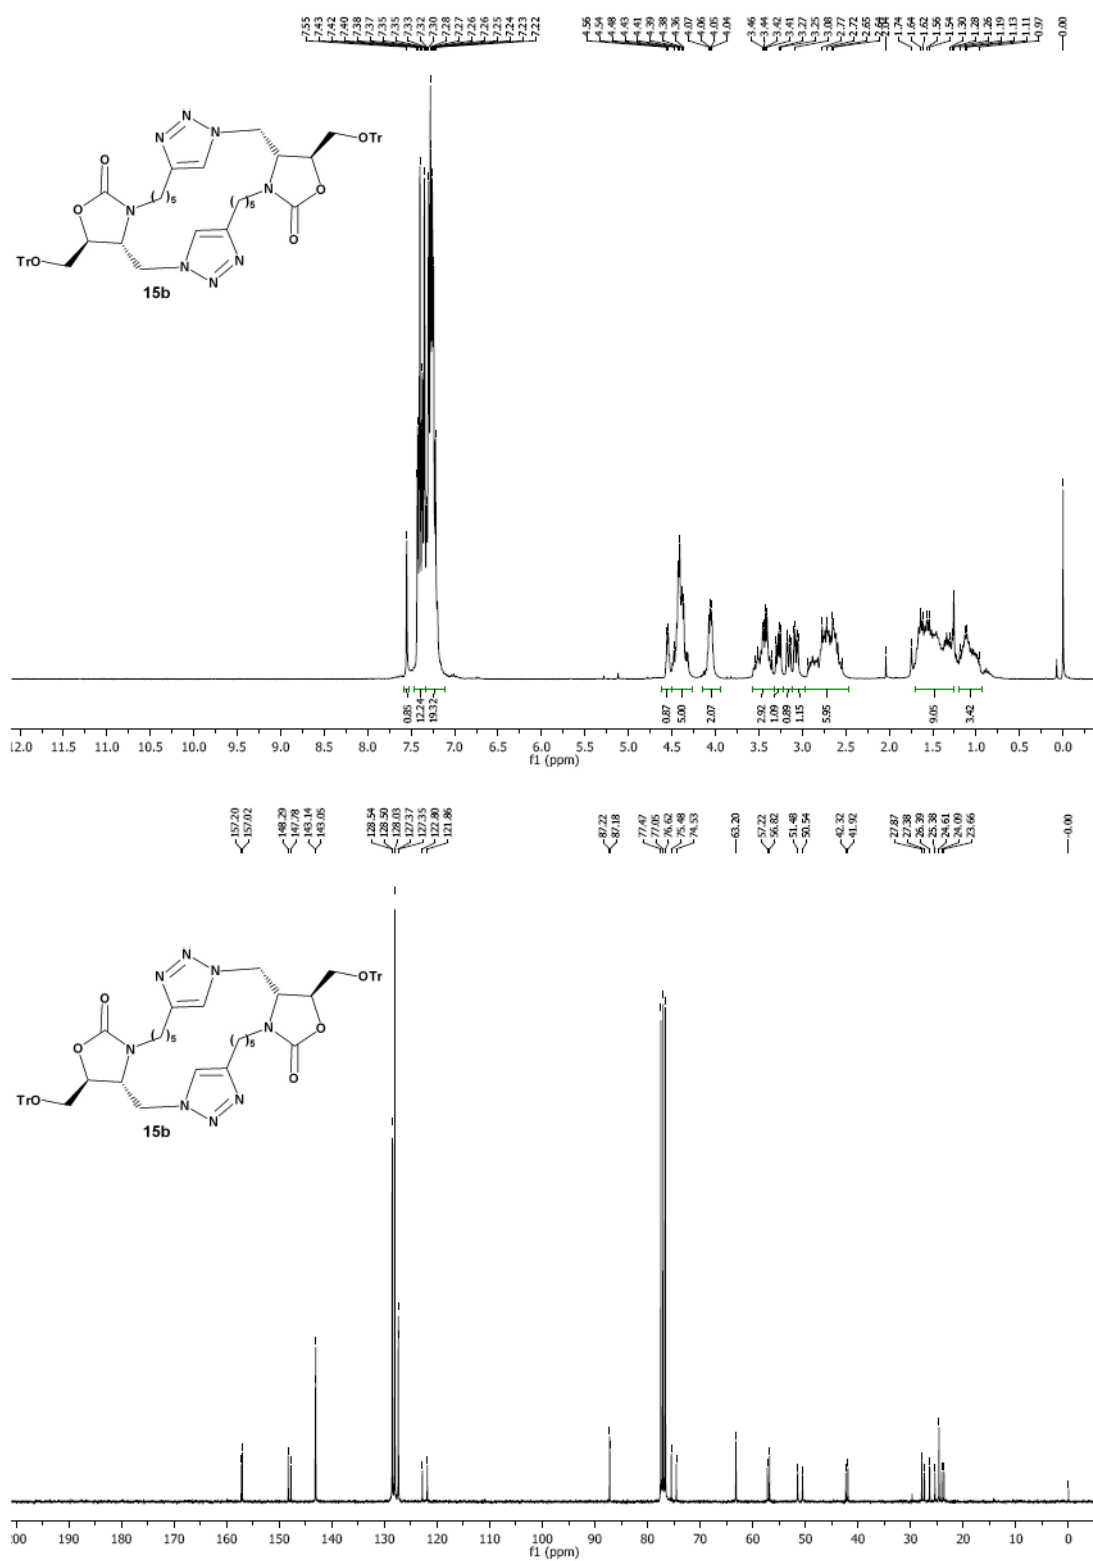

Figure 40.  $^1\text{H}$  and  $^{13}\text{C}$  NMR spectra for compound **15c** ( $\text{CDCl}_3$ )

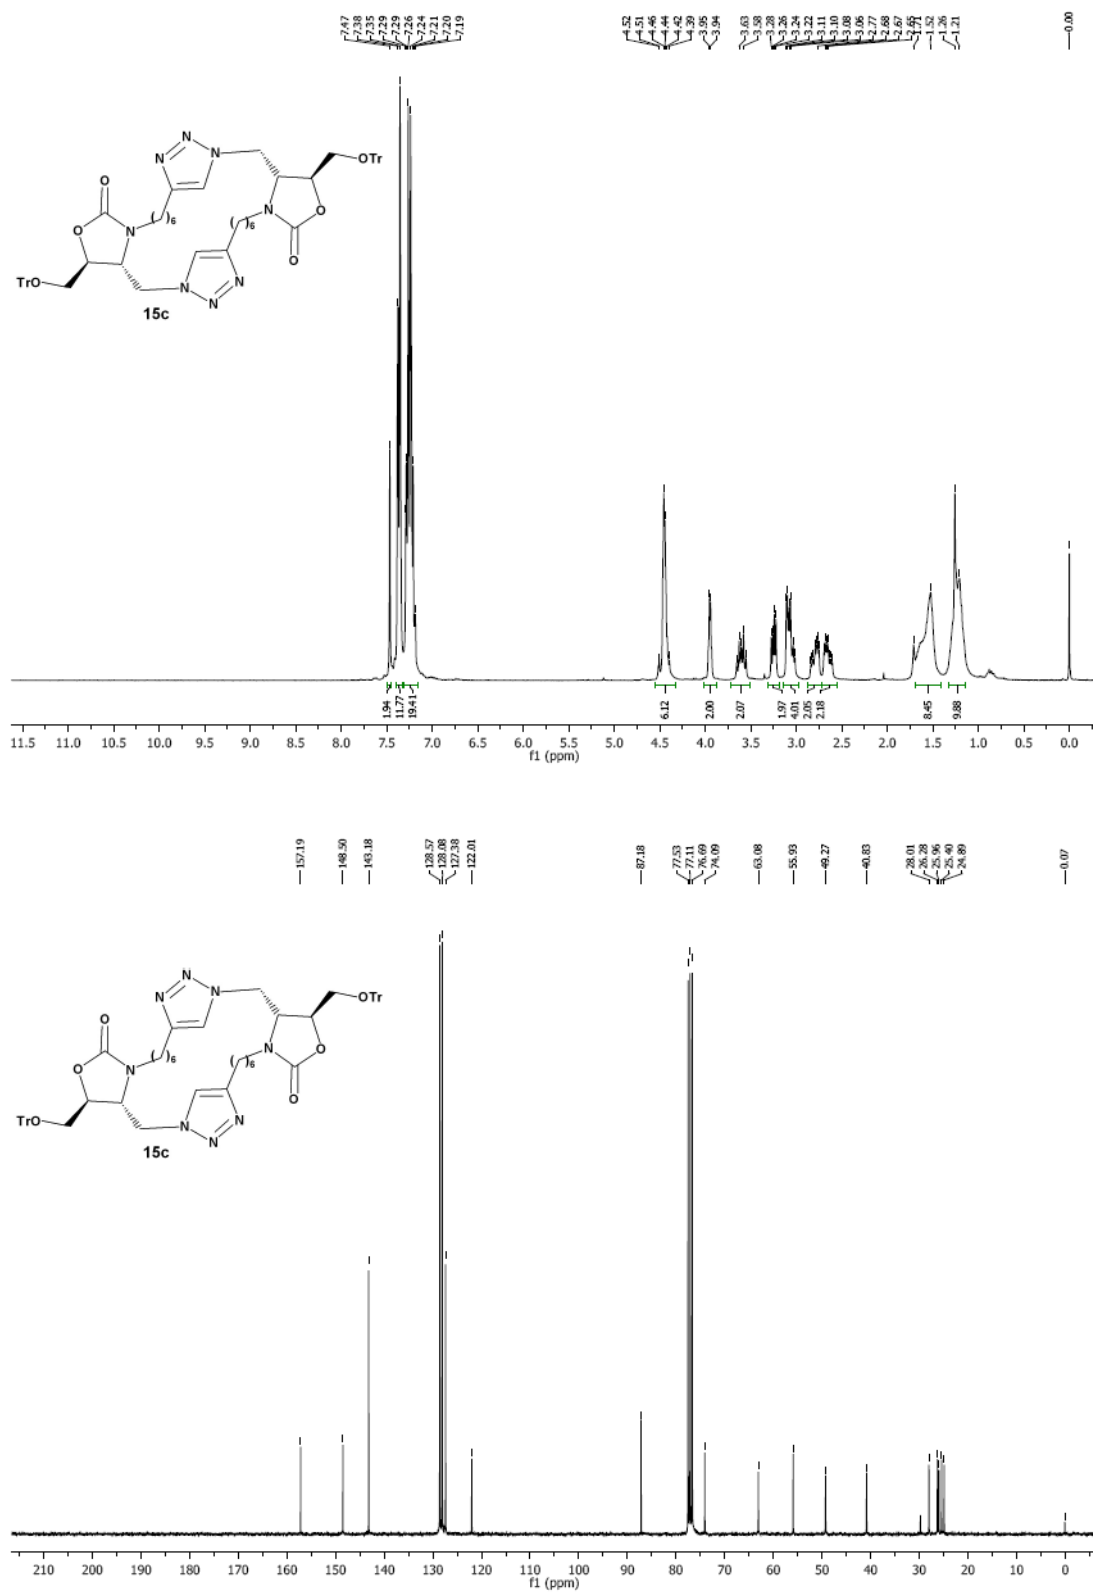

Figure 41.  $^1\text{H}$  and  $^{13}\text{C}$  NMR spectra for compound **15d** ( $\text{CDCl}_3$ )

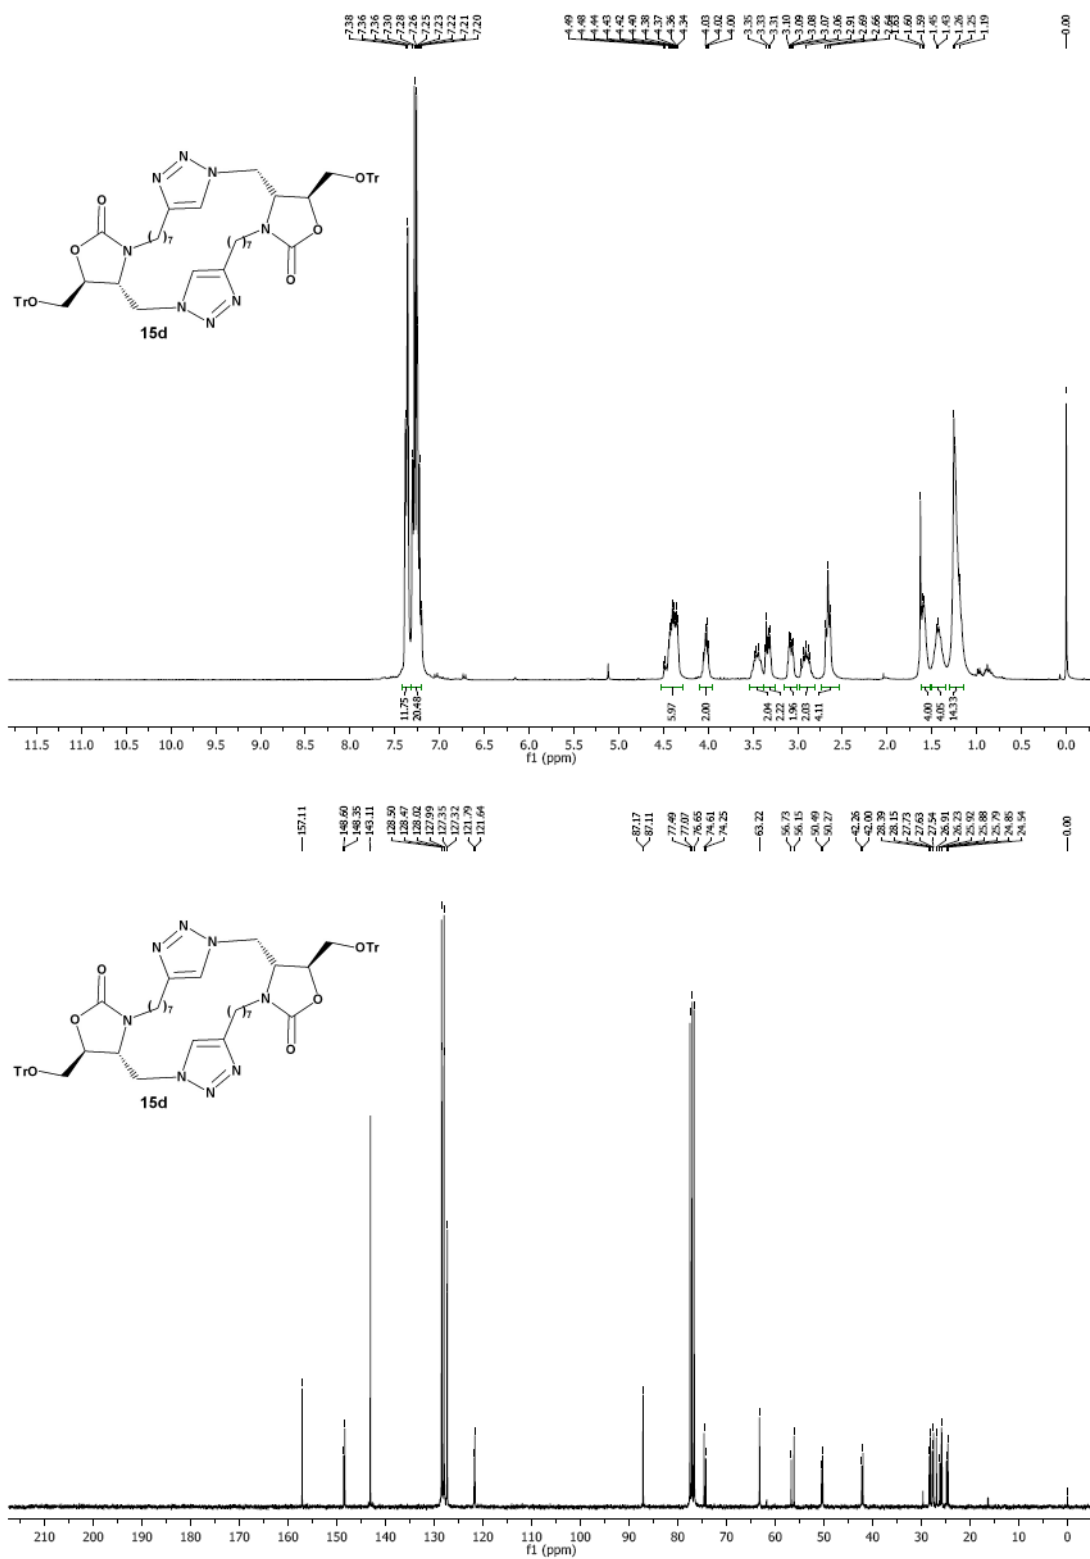

Figure 42.  $^1\text{H}$  and  $^{13}\text{C}$  NMR spectra for compound **8a** ( $\text{CDCl}_3$ )

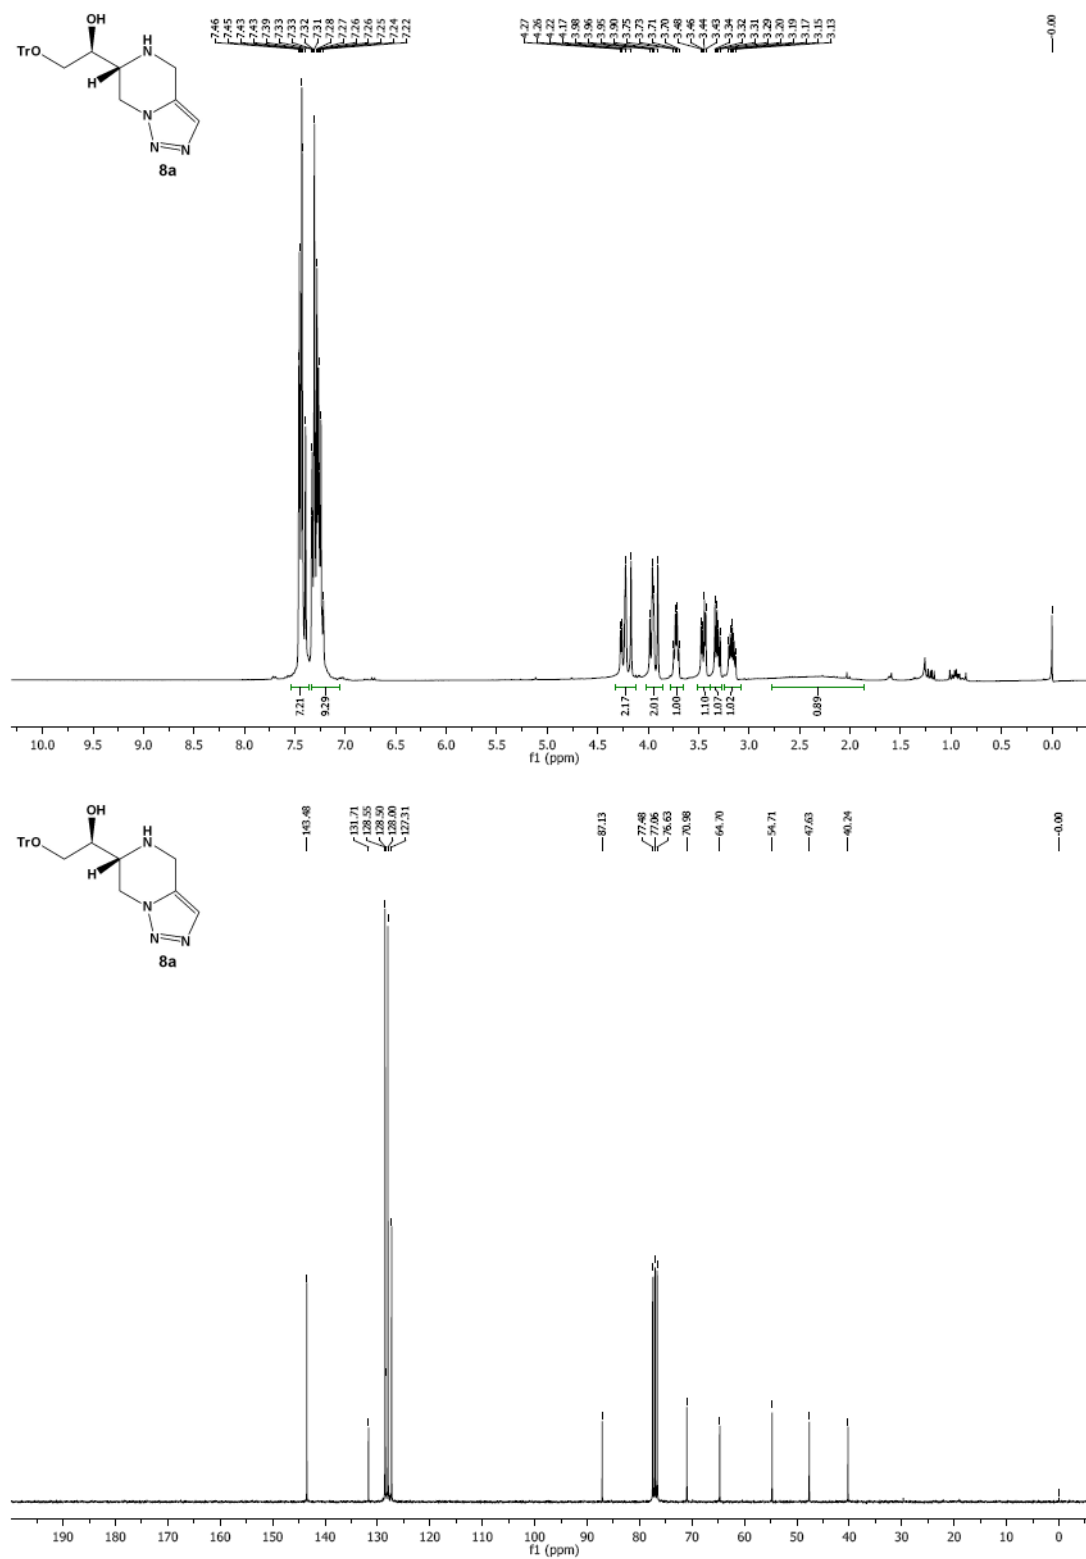

Figure 43.  $^1\text{H}$  and  $^{13}\text{C}$  NMR spectra for compound **8c** ( $\text{CDCl}_3$ )

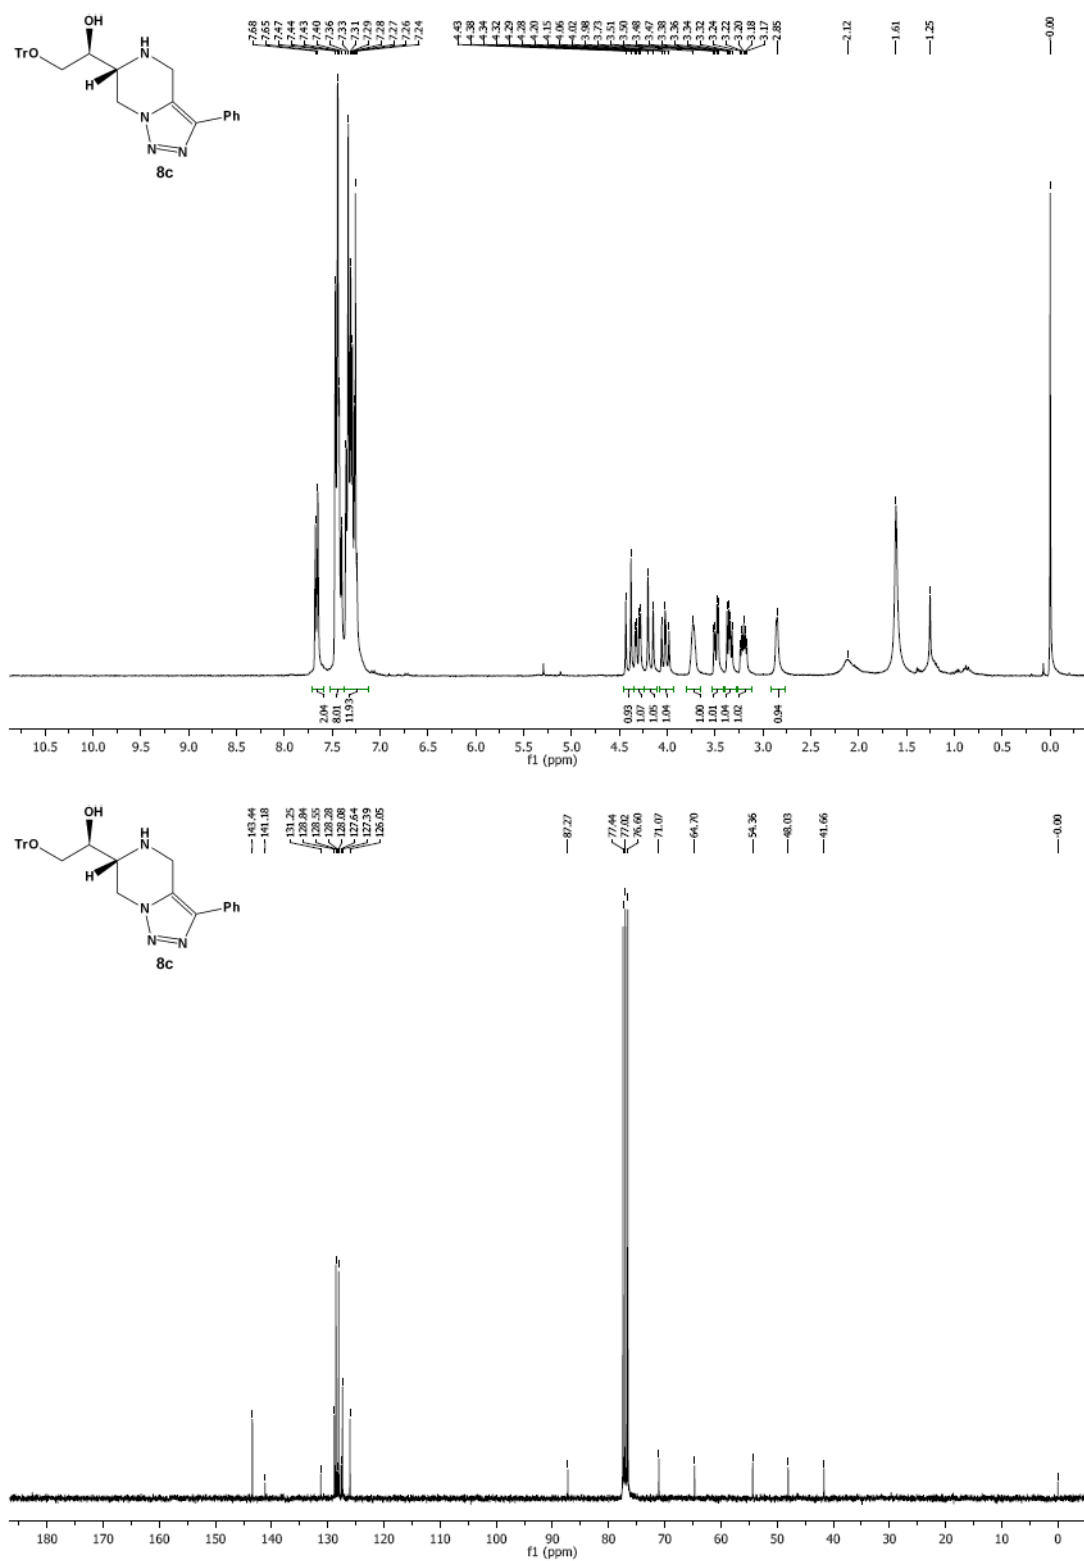

Figure 44.  $^1\text{H}$  and  $^{13}\text{C}$  NMR spectra for compound **8i** ( $\text{CDCl}_3$ )

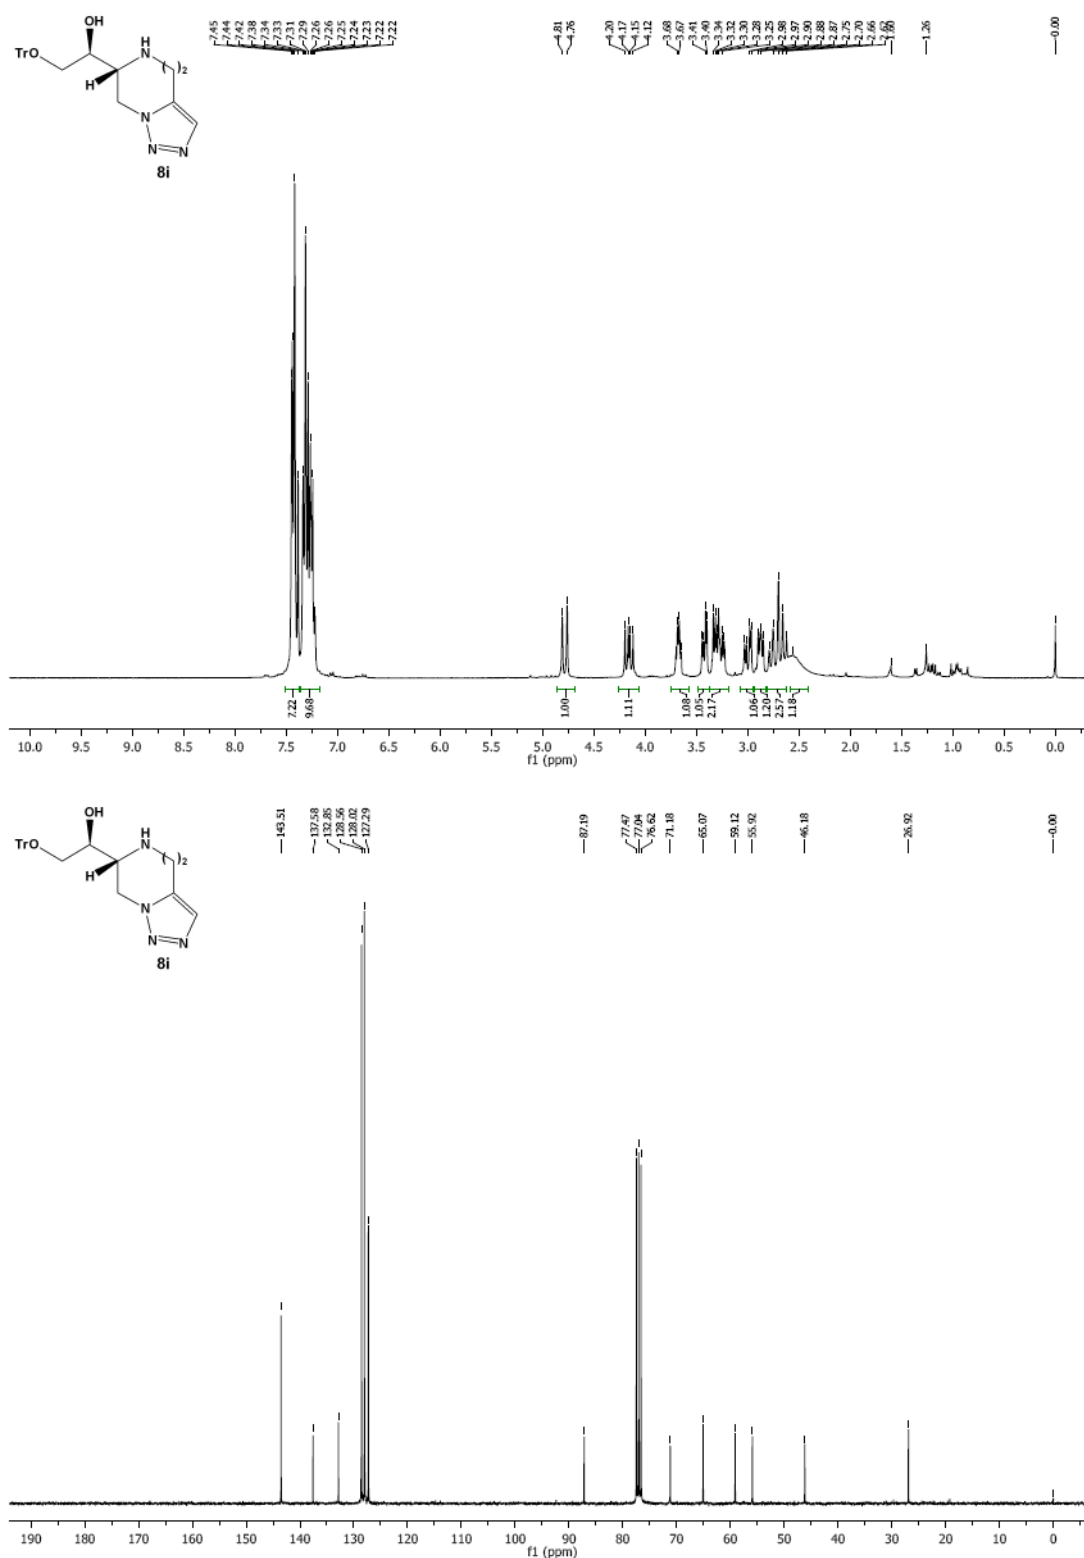

Figure 45.  $^1\text{H}$  and  $^{13}\text{C}$  NMR spectra for compound **8k** ( $\text{CDCl}_3$ )

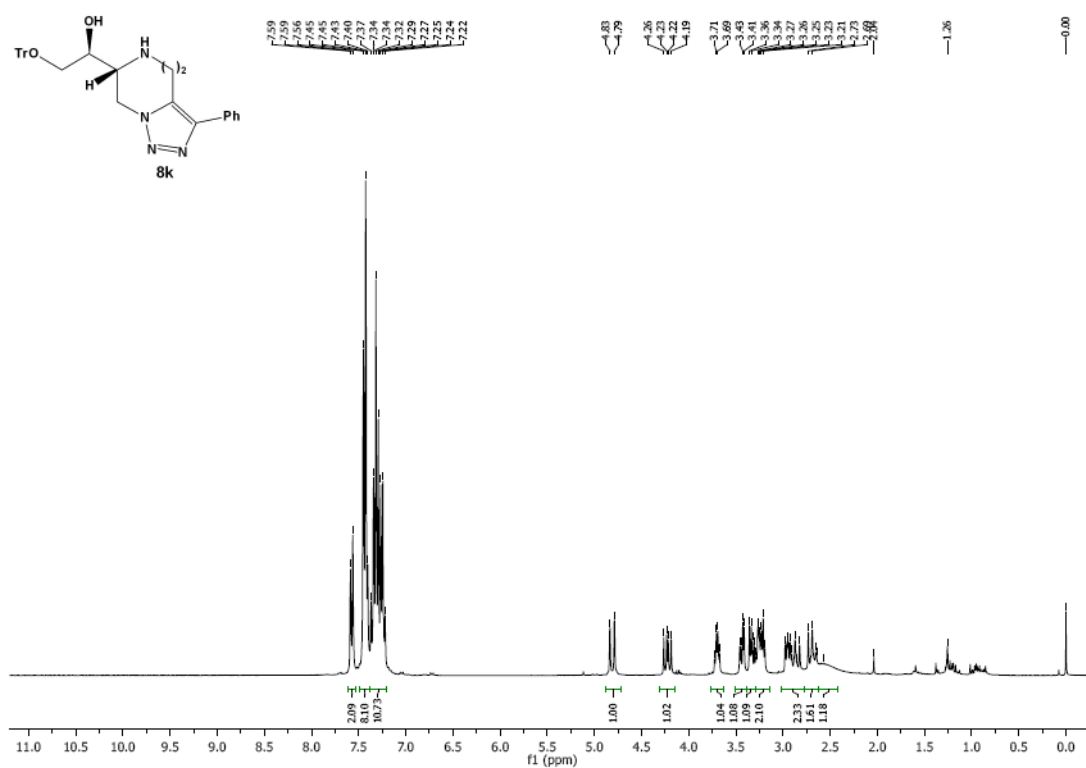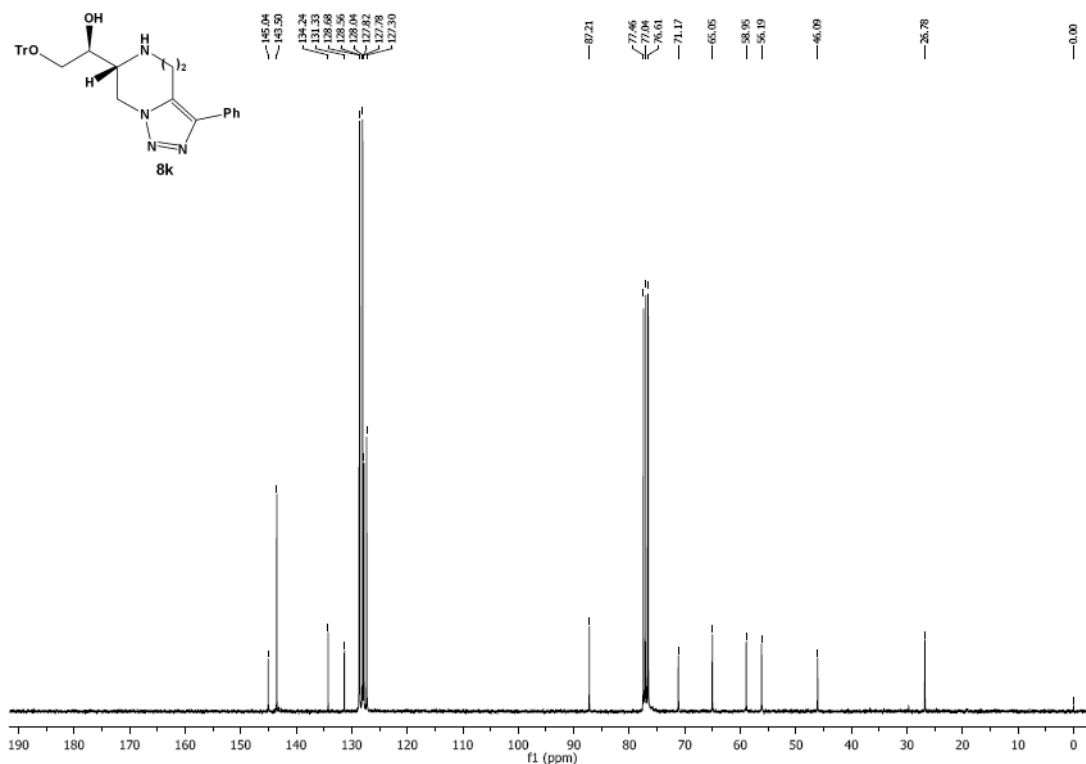

Figure 46.  $^1\text{H}$  and  $^{13}\text{C}$  NMR spectra for compound **81** ( $\text{CDCl}_3$ )

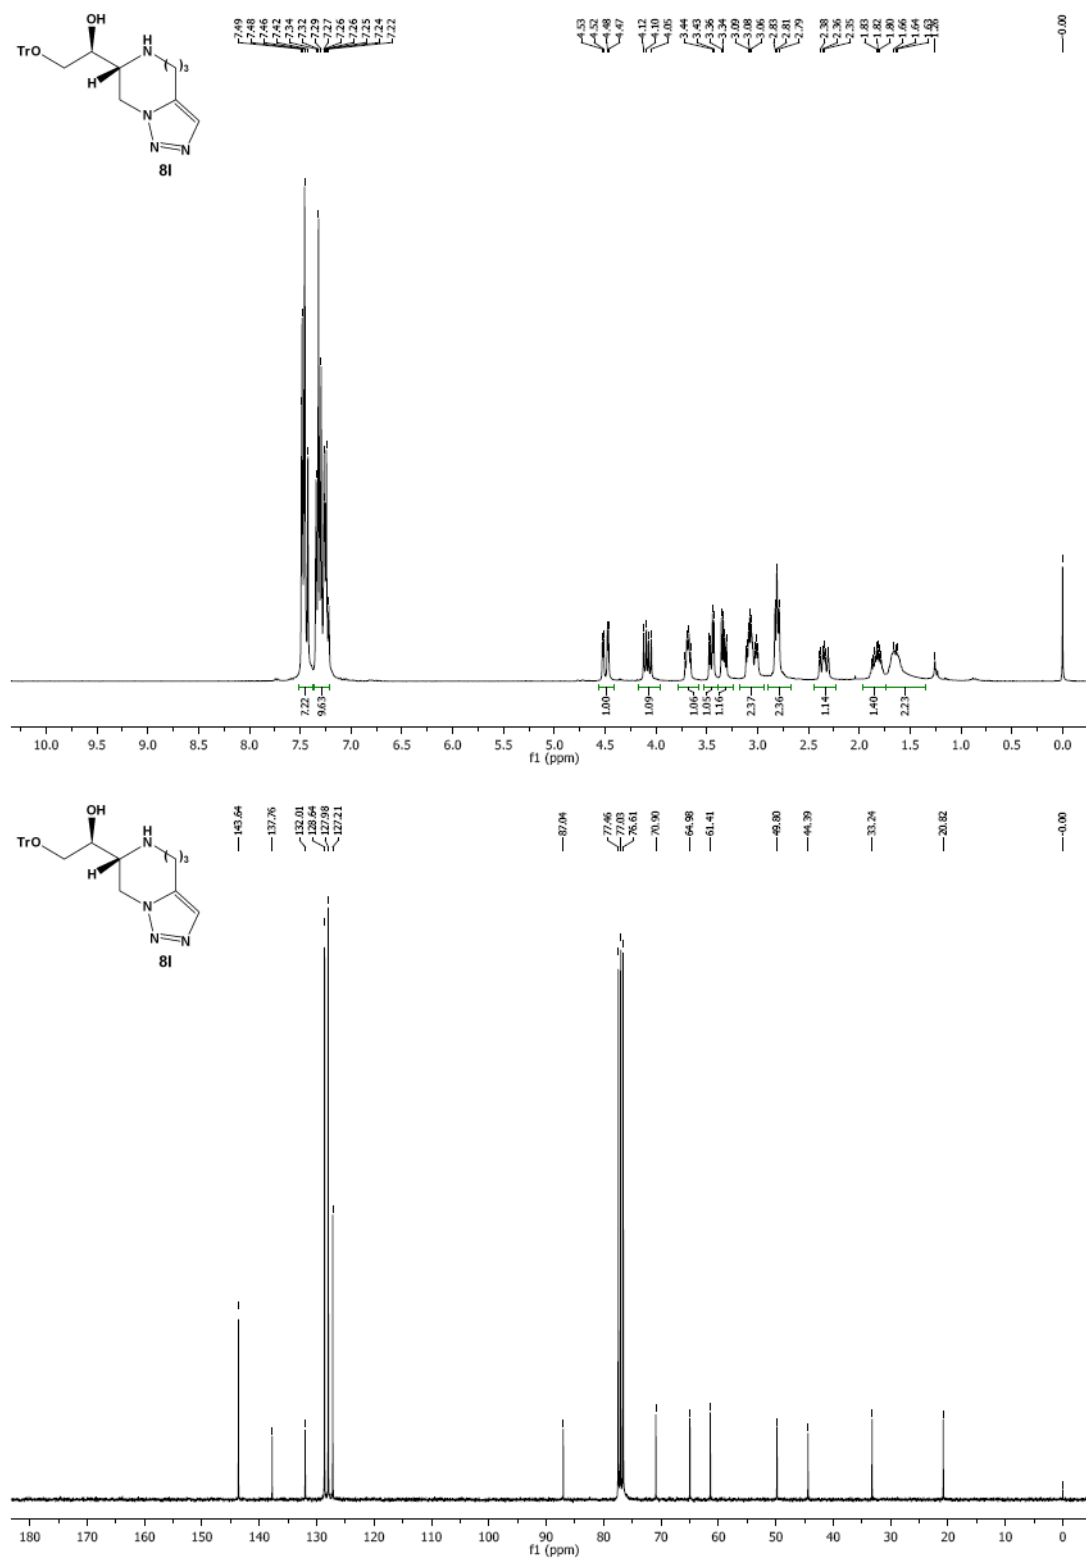



Figure 47.  $^1\text{H}$  and  $^{13}\text{C}$  NMR spectra for compound **8m** ( $\text{CDCl}_3$ )

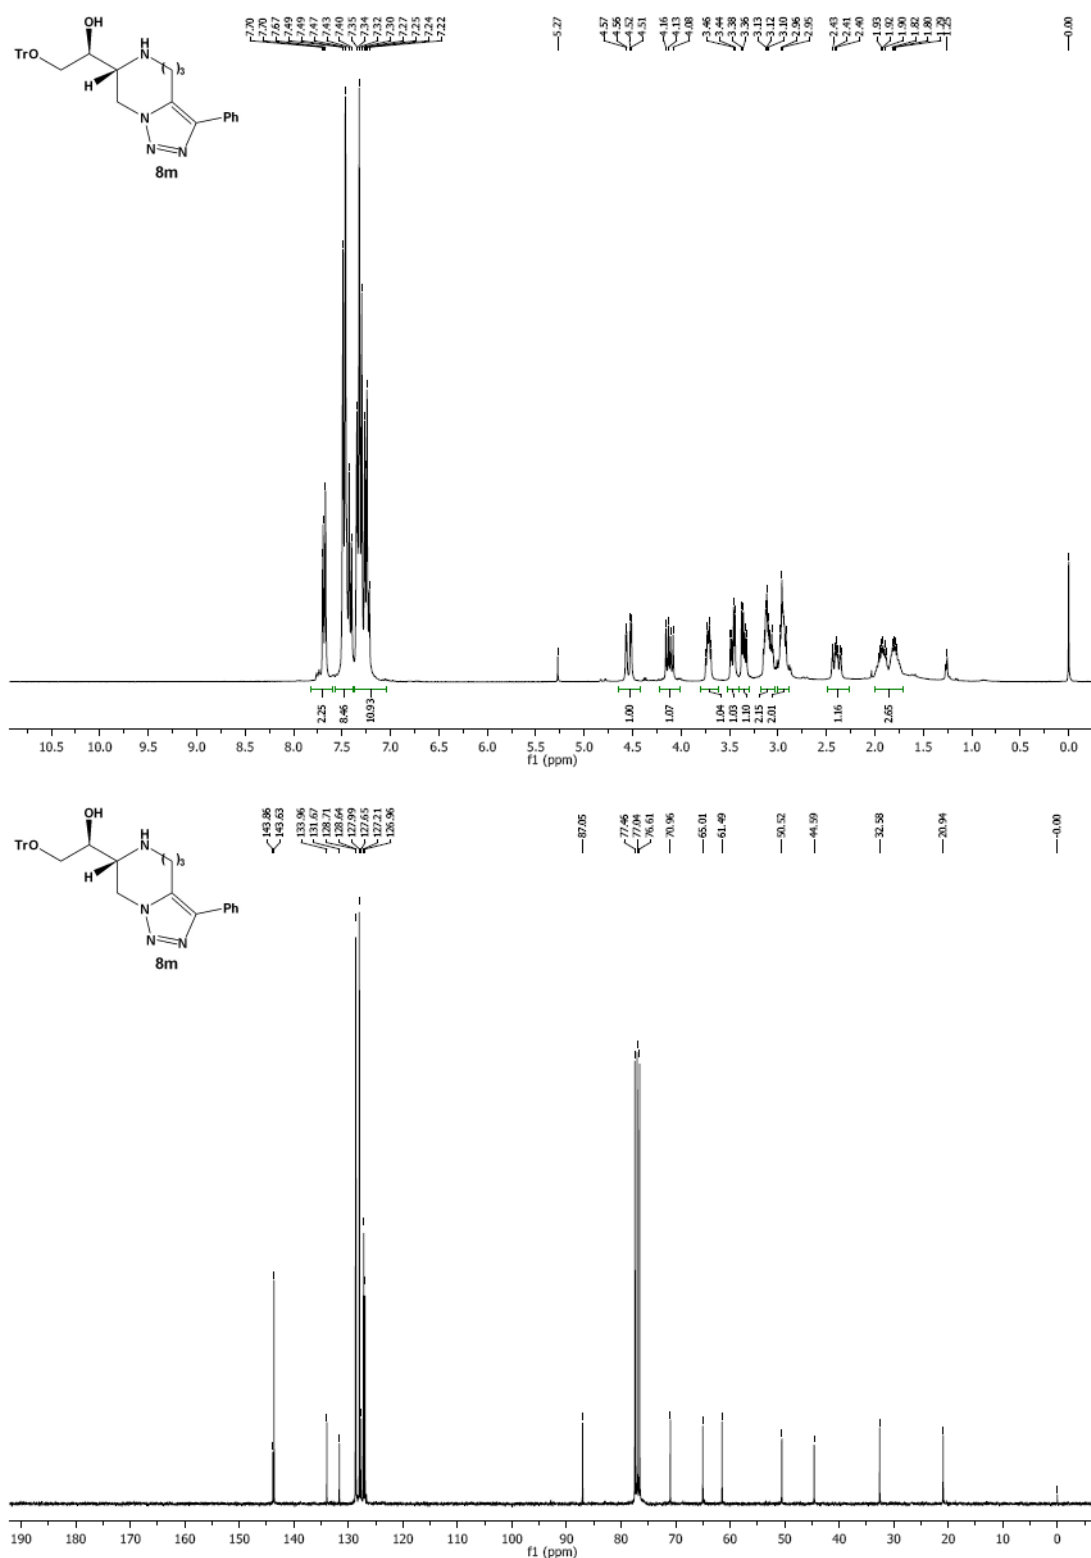

Figure 48.  $^1\text{H}$  and  $^{13}\text{C}$  NMR spectra for compound **8n** ( $\text{CDCl}_3$ )

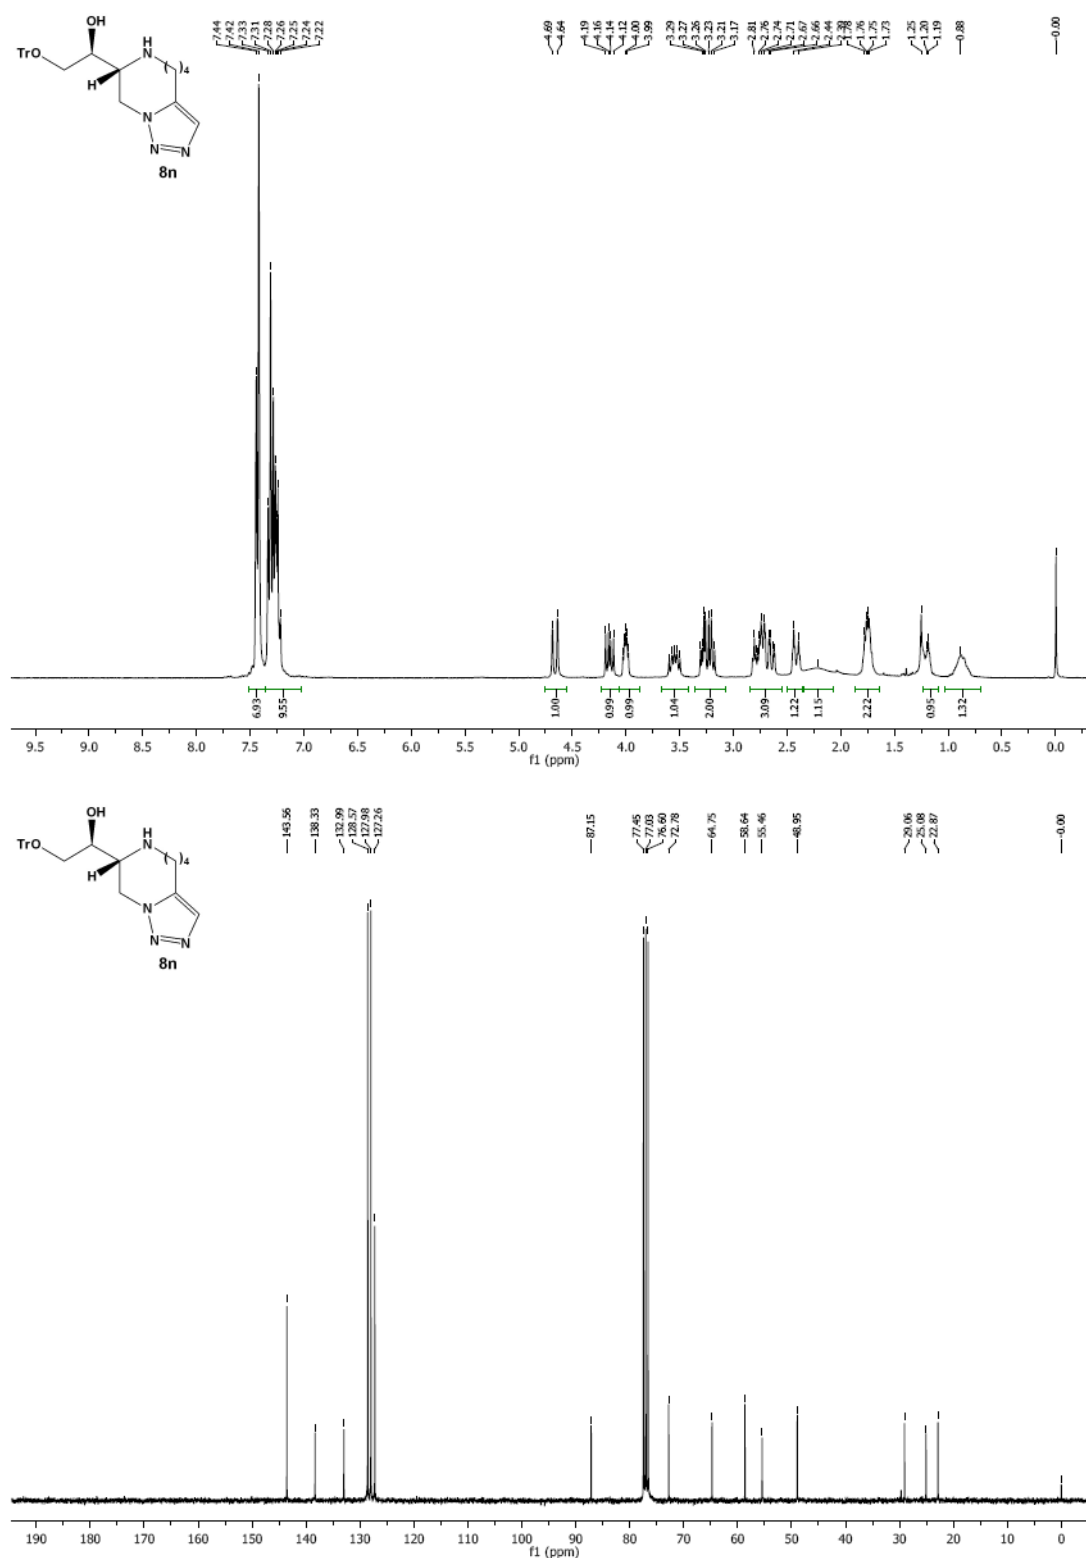

Figure 49.  $^1\text{H}$  and  $^{13}\text{C}$  NMR spectra for compound **8o** ( $\text{CDCl}_3$ )

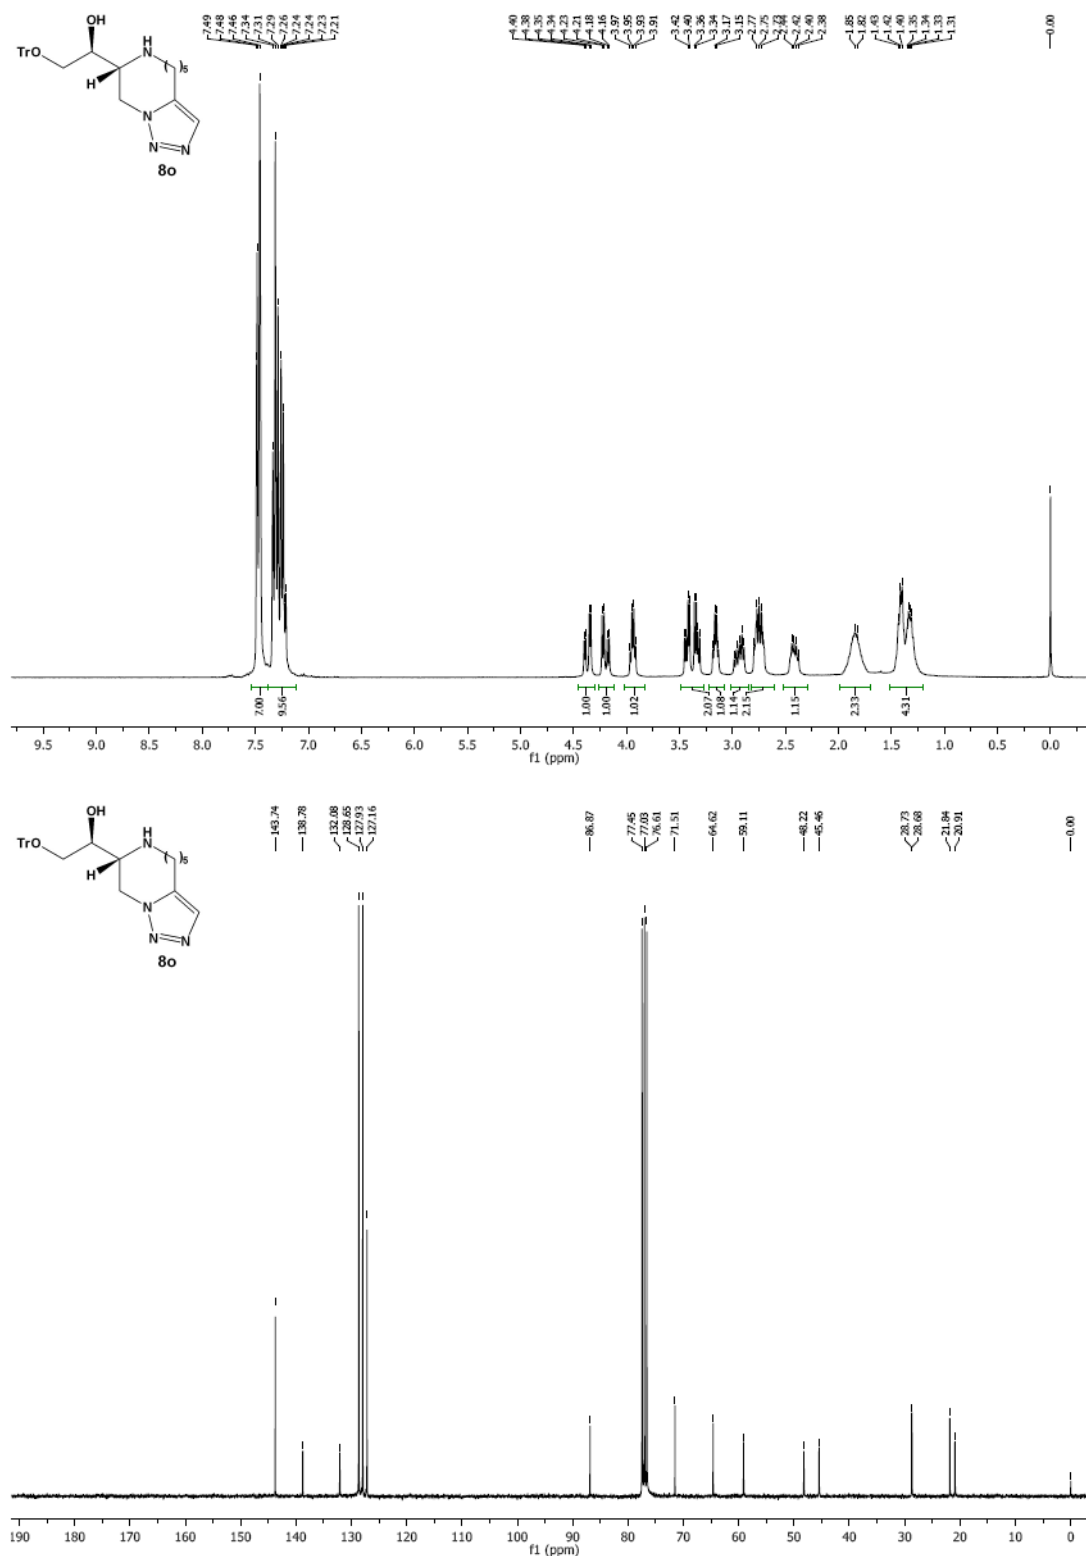

Figure 50.  $^1\text{H}$  and  $^{13}\text{C}$  NMR spectra for compound **8p** ( $\text{CDCl}_3$ )

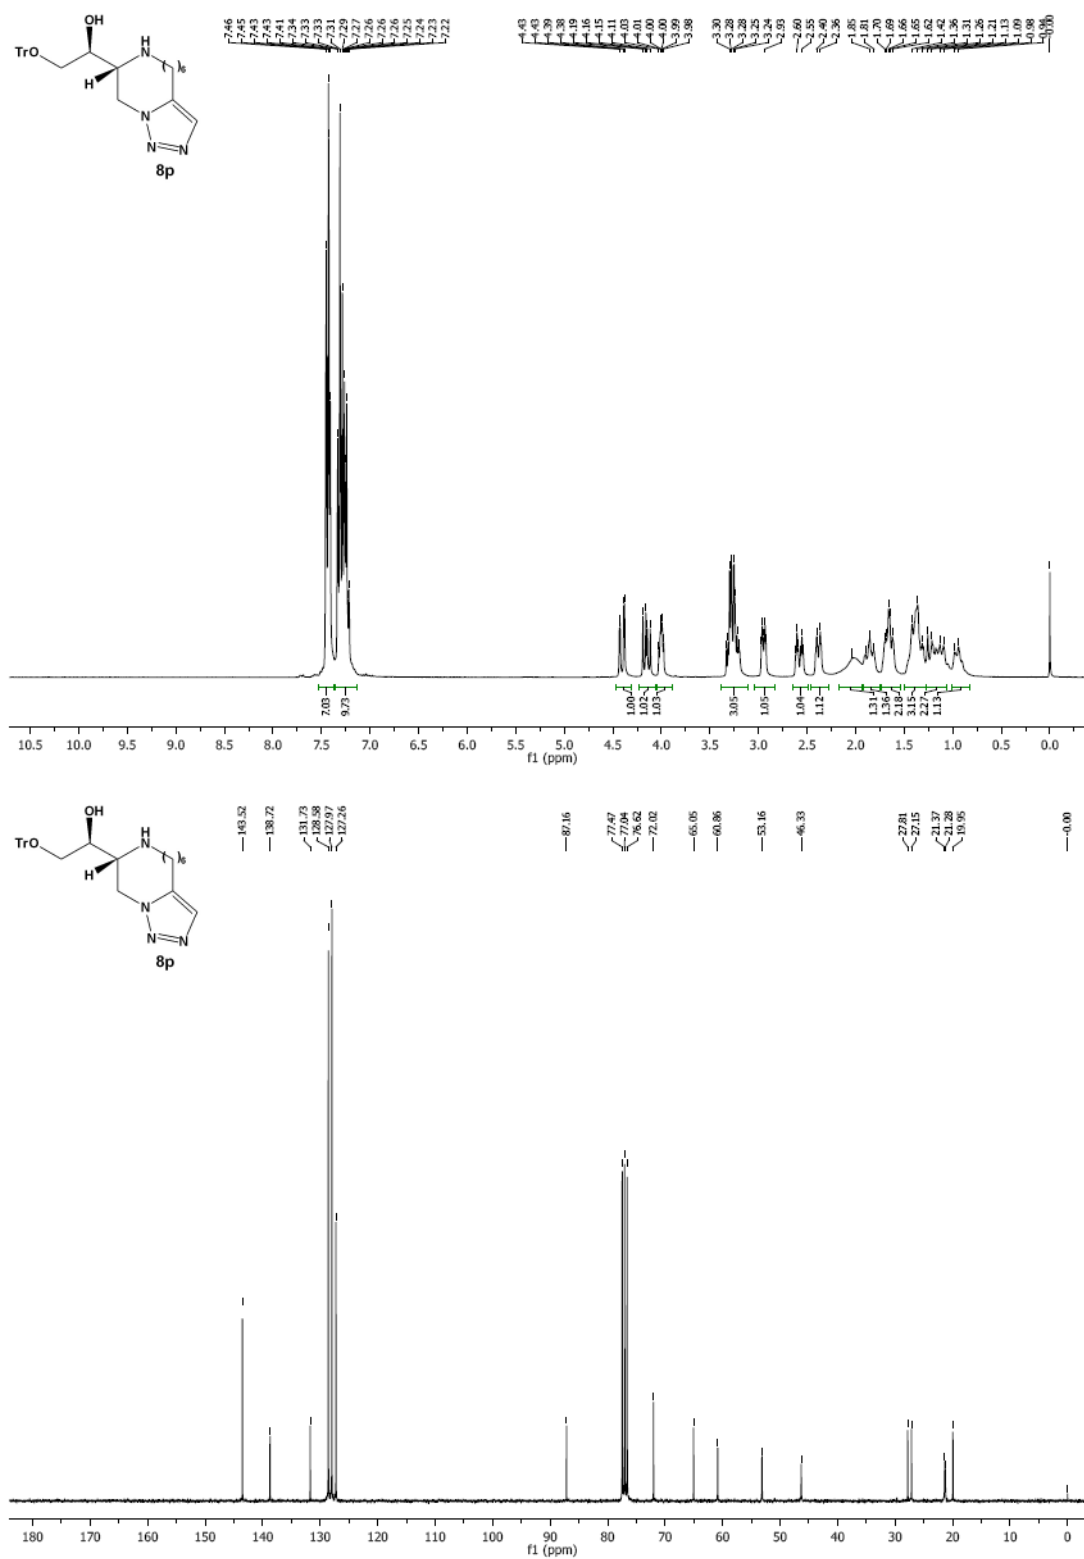

Figure S1.  $^1\text{H}$  and  $^{13}\text{C}$  NMR spectra for compound **8q** ( $\text{CDCl}_3$ )

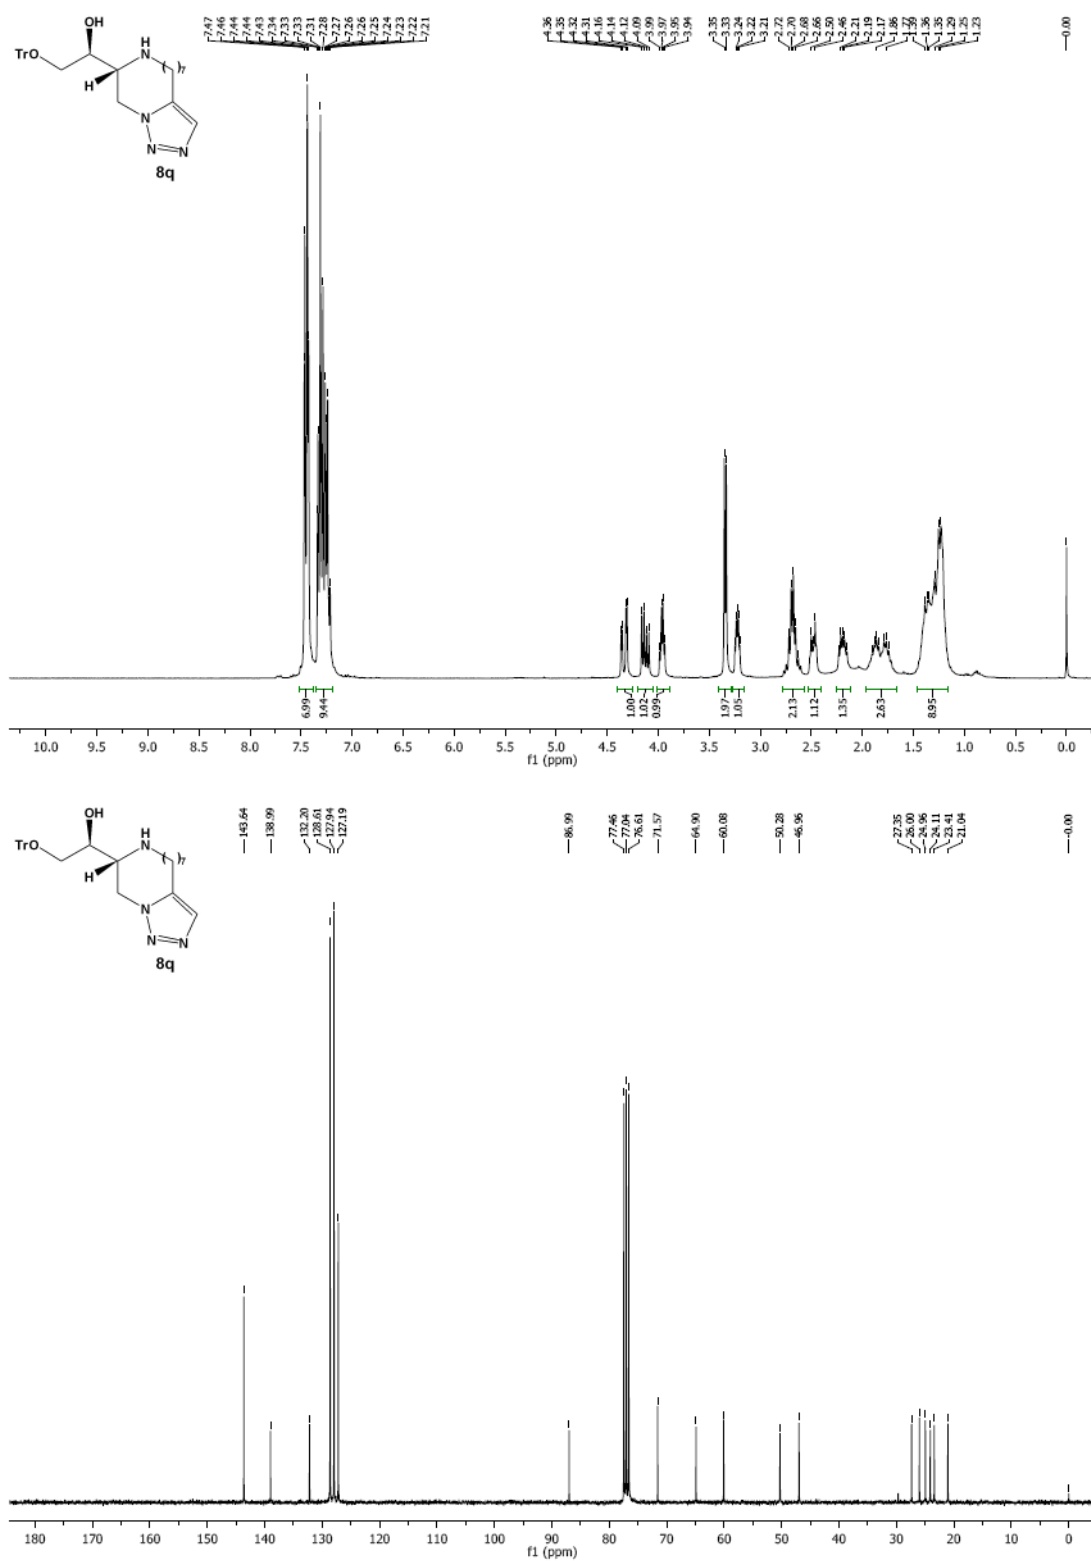

Supplement: c2ob07042a.pdf [file c2ob07042a.pdf]
